# Supplementary material
Source: PubMed Central journal article supplement (PMC7156920)

# THE LANCET HIV

## Supplementary appendix

This appendix formed part of the original submission and has been peer reviewed. We post it as supplied by the authors.

Supplement to: GBD 2017 HIV collaborators. Global, regional, and national incidence, prevalence, and mortality of HIV, 1980–2017, and forecasts to 2030, for 195 countries and territories: a systematic analysis for the Global Burden of Diseases, Injuries, and Risk Factors Study 2017. *Lancet HIV* 2019; published online Aug 19. [http://dx.doi.org/10.1016/S2352-3018\(19\)30196-1](http://dx.doi.org/10.1016/S2352-3018(19)30196-1).

Supplemental Results Appendix to Global, regional, and national incidence, prevalence, and mortality of HIV from 1980 to 2017 with forecasts to 2030, for 195 countries and territories: a systematic analysis for the Global Burden of Diseases, Injuries, and Risk Factors (GBD) 2017 Study

## Table of Contents

|                                                                                                                                                  |    |
|--------------------------------------------------------------------------------------------------------------------------------------------------|----|
| Appendix Table 1: Baseline ART Coverage (%) in 2010, and forecast ART coverage (%) in 2020 and 2030.....                                         | 3  |
| Appendix Table 2. Forecast number of deaths and percent change between 2010-2020 and 2010-2030.....                                              | 13 |
| Appendix Table 3. Forecast number of incident cases and percent change in incident cases between 2010-2020 and 2010-2030.....                    | 19 |
| Appendix Figure 1. Percentage of PLHIV on and off ART coverage in all GBD super-regions, by country, by sex, 2017.....                           | 25 |
| Appendix Figure 2. All-age rate of HIV incidence (A), prevalence (B), and mortality (C),2017.....                                                | 32 |
| Appendix Figure 3. Percentage of new HIV infections and HIV deaths occurring in each age group in Sub-Saharan Africa, by sex, 2007 and 2017..... | 33 |

**Appendix Table 1: Baseline ART Coverage (%) in 2010, and forecast ART coverage (%) in 2020 and 2030**

|                                                         | ART Coverage (%)       |                           |                        |
|---------------------------------------------------------|------------------------|---------------------------|------------------------|
|                                                         | Baseline (2010)        | 2020                      | 2030                   |
| <b>Global</b>                                           | 25.06<br>(23.2;26.8)   | 64.83<br>(61.08;67.03)    | 71.88<br>(68.22;75.03) |
| <b>Central Europe, Eastern Europe, and Central Asia</b> |                        |                           |                        |
| <b>Central Asia</b>                                     |                        |                           |                        |
| Armenia                                                 | 45.62<br>(32.85;61.06) | 80.8***<br>(70.35;84.42)  | 87.46<br>(79.94;91.01) |
| Azerbaijan                                              | 42.44<br>(30.61;56.81) | 81.96***<br>(79.75;83.41) | 87.23<br>(85.34;89.1)  |
| Georgia                                                 | 35.7<br>(20.78;60.53)  | 74.9<br>(53.46;83.23)     | 79.21<br>(62.08;85.61) |
| Kazakhstan                                              | 22.9<br>(15.85;30.51)  | 69.34<br>(58;77.87)       | 79.17<br>(69.16;86.55) |
| Kyrgyzstan                                              | 7.07<br>(4.07;11.2)    | 61.51<br>(41.91;76.16)    | 70.21<br>(51.78;82.96) |
| Mongolia                                                | 12.28<br>(5.08;26.14)  | 34.9<br>(14.69;76.69)     | 37.69<br>(18.53;78.48) |
| Tajikistan                                              | 10.38<br>(7.18;14.68)  | 76.14<br>(70.33;81.98)    | 80.45<br>(74.67;85.23) |
| Turkmenistan                                            | 0.31<br>(0.19;0.45)    | 2.15<br>(1.61;2.75)       | 4.97<br>(4.01;6.02)    |
| Uzbekistan                                              | 12.77<br>(9.62;16.76)  | 74.85<br>(65.06;84.64)    | 81.3<br>(74.34;86.04)  |
| <b>Central Europe</b>                                   |                        |                           |                        |
| Albania                                                 | 24.19<br>(20.26;28.48) | 50.66<br>(46.77;54.24)    | 61.03<br>(56.51;65.38) |
| Bosnia and Herzegovina                                  | 26.83<br>(22.32;32.2)  | 49.8<br>(45.89;53.6)      | 59.1<br>(54.44;63.46)  |
| Bulgaria                                                | 35.15<br>(25.14;44.31) | 71.02<br>(61.25;79.21)    | 78.19<br>(69.94;84.66) |
| Croatia                                                 | 55.08<br>(46.24;64.54) | 83.95***<br>(79.94;86.89) | 86.49<br>(83.28;88.55) |
| Czech Republic                                          | 72.27<br>(61.35;78.62) | 84.1***<br>(79.63;87.45)  | 87.36<br>(83.02;89.56) |
| Hungary                                                 | 52.08<br>(44.2;61.23)  | 77.53<br>(72.39;82.66)    | 79.45<br>(73.68;84.46) |
| Macedonia                                               | 48.88<br>(40.34;57.73) | 83.37***<br>(82.32;84.07) | 87.25<br>(85.69;89.02) |

|            |                        |                           |                           |
|------------|------------------------|---------------------------|---------------------------|
| Montenegro | 67.97<br>(58.39;72.33) | 81.51***<br>(78.81;84.99) | 85.63<br>(83.21;88.17)    |
| Poland     | 83.02<br>(77.15;86.69) | 87.09***<br>(85.99;89.5)  | 89.66***<br>(88.62;90.94) |
| Romania    | 70.86<br>(64.85;79.38) | 80.87***<br>(74.87;86.07) | 84.13<br>(79.22;87.92)    |
| Serbia     | 51.38<br>(30.63;65.24) | 71.23<br>(52.57;85.98)    | 74.9<br>(60.05;87.61)     |
| Slovakia   | 68.47<br>(56.54;76.12) | 85.69***<br>(84.86;86.46) | 88.39<br>(87.64;89.59)    |
| Slovenia   | 64.11<br>(55.35;74.25) | 86.38***<br>(84.22;88.05) | 89.64***<br>(87.75;91.03) |

### Eastern Europe

|                    |                        |                           |                           |
|--------------------|------------------------|---------------------------|---------------------------|
| Belarus            | 31.21<br>(22.47;42.18) | 68.66<br>(54.29;80.96)    | 79.86<br>(67.95;89.68)    |
| Estonia            | 69.61<br>(62.55;75.3)  | 86.25***<br>(85.19;87.21) | 89.97***<br>(89.08;91.27) |
| Latvia             | 26.96<br>(19.05;35.35) | 65.75<br>(54.76;77.97)    | 77.21<br>(66.98;87.64)    |
| Lithuania          | 11.29<br>(8.51;15.17)  | 54.15<br>(40.58;73.82)    | 62.3<br>(49.47;79.78)     |
| Moldova            | 20.55<br>(13.17;30.6)  | 62.66<br>(42.6;82.06)     | 71.93<br>(56;87.69)       |
| Russian Federation | 28.05<br>(18.83;38.21) | 68.28<br>(61.38;73.19)    | 81.14<br>(75.7;85.51)     |
| Ukraine            | 18.26<br>(12.58;24.52) | 67.31<br>(58.67;75.47)    | 79.52<br>(72.46;85.94)    |

### High-income

#### Australasia

|             |                        |                           |                           |
|-------------|------------------------|---------------------------|---------------------------|
| Australia   | 83.66<br>(71.95;88.81) | 87.21***<br>(83.08;88.73) | 87.14<br>(83.1;88.58)     |
| New Zealand | 82.1<br>(76.34;85.71)  | 90.03***<br>(87.66;92.74) | 90.53***<br>(88.67;92.76) |

#### High-income Asia-Pacific

|             |                        |                           |                        |
|-------------|------------------------|---------------------------|------------------------|
| Brunei      | 43.33<br>(38.47;47.8)  | 65.33<br>(59.2;70.52)     | 72.4<br>(65.02;78.49)  |
| Japan       | 73.36<br>(68.32;77.1)  | 86.54***<br>(85.41;88.44) | 88.17<br>(87.43;89.66) |
| South Korea | 41.03<br>(25.46;57.8)  | 45.89<br>(29.78;65.01)    | 50.37<br>(34.26;68.35) |
| Singapore   | 64.17<br>(42.73;82.79) | 76.9<br>(55.59;88.65)     | 80.67<br>(62.22;89.89) |

#### High-income North America

|           |                        |                           |                        |
|-----------|------------------------|---------------------------|------------------------|
| Canada    | 85.7<br>(73.95;90.86)  | 86.66***<br>(82.15;90.53) | 87.62<br>(84.01;90.9)  |
| Greenland | 50.11<br>(43.55;57.15) | 81.94***<br>(74.82;87.84) | 85.74<br>(77.63;91.8)  |
| USA       | 67.52<br>(62.17;72.72) | 88.59***<br>(86.75;91.21) | 89.36<br>(87.81;91.77) |

#### Southern Latin America

|           |                        |                        |                        |
|-----------|------------------------|------------------------|------------------------|
| Argentina | 43.34<br>(28.56;63.42) | 51.27<br>(34.14;72.15) | 58.73<br>(43.18;75.55) |
| Chile     | 51.46<br>(34.8;68.16)  | 68.95<br>(46.49;84.55) | 75.36<br>(55.81;87.16) |
| Uruguay   | 30.08<br>(21.17;43.61) | 64.98<br>(49.91;79.52) | 70.37<br>(57.12;82.36) |

#### Western Europe

|             |                        |                           |                           |
|-------------|------------------------|---------------------------|---------------------------|
| Andorra     | 74.13<br>(62.27;85.42) | 87.89***<br>(85.26;91.64) | 90.79***<br>(89.04;93.25) |
| Austria     | 82.43<br>(76.83;86.02) | 86.56***<br>(85.07;87.88) | 88.83<br>(87.48;90.17)    |
| Belgium     | 83.27<br>(77.7;87.16)  | 86.45***<br>(84.9;88.96)  | 88.2<br>(86.71;90.21)     |
| Cyprus      | 64.98<br>(57.9;71.99)  | 84.1***<br>(82.59;85.14)  | 87.93<br>(86.8;88.78)     |
| Denmark     | 64.45<br>(47.94;80.13) | 72.46<br>(62.03;86.17)    | 74.83<br>(65.05;87.26)    |
| Finland     | 81.68<br>(76.33;85.56) | 86.86***<br>(84.67;89.57) | 87.98<br>(85.91;90.3)     |
| France      | 69.09<br>(64.84;73.05) | 79.12<br>(73.64;83.57)    | 80.02<br>(73.96;84.61)    |
| Germany     | 61.05<br>(53.45;71.91) | 85.25***<br>(82.6;87.26)  | 86.17<br>(84.16;87.83)    |
| Greece      | 84.83<br>(83.71;85.58) | 86.8***<br>(86.01;87.63)  | 87.73<br>(87.27;88.24)    |
| Iceland     | 54.28<br>(45.98;62.8)  | 85.13***<br>(83.08;87.66) | 89.4<br>(88.28;90.42)     |
| Ireland     | 83.07<br>(77.65;87.13) | 86.54***<br>(85.36;89.19) | 88.2<br>(87.04;89.74)     |
| Israel      | 78.71<br>(73.53;83.72) | 85.15***<br>(82.92;86.81) | 86.44<br>(84.42;88.18)    |
| Italy       | 86.73<br>(82.97;88.81) | 87.9***<br>(86.34;89.11)  | 88.43<br>(87.03;89.81)    |
| Luxembourg  | 79.04<br>(71.94;84.52) | 85.67***<br>(83.73;88.64) | 88.78<br>(87.56;90.26)    |
| Malta       | 56.03<br>(45.35;67.7)  | 68.67<br>(59.83;84.13)    | 75.51<br>(68.53;87.14)    |
| Netherlands | 70.19<br>(57.41;85.46) | 81.72***<br>(75.65;88.88) | 82.78<br>(77.4;89.77)     |

|                |                        |                           |                           |
|----------------|------------------------|---------------------------|---------------------------|
| Norway         | 82.83<br>(77.28;86.64) | 86.17***<br>(85.07;87.44) | 88.5<br>(87.42;89.7)      |
| Portugal       | 86.63<br>(85.71;88.06) | 86.99***<br>(86.07;89.11) | 89.98***<br>(89.22;91.38) |
| Spain          | 88.74<br>(85.82;90.25) | 88.19***<br>(85.17;90.65) | 89.81***<br>(86.48;92.2)  |
| Sweden         | 73.12<br>(66.68;78.85) | 85.26***<br>(81.67;88.3)  | 87.8<br>(84.16;90.5)      |
| Switzerland    | 88.11<br>(87.31;89.67) | 88.02***<br>(86.89;91.48) | 88.22<br>(87.11;91.53)    |
| United Kingdom | 81.34<br>(76.73;85.19) | 88.97***<br>(88.07;89.87) | 90.32***<br>(89.61;91.04) |

### Latin America and Caribbean

#### Andean Latin America

|         |                        |                        |                        |
|---------|------------------------|------------------------|------------------------|
| Bolivia | 16.82<br>(3.17;47.47)  | 50.42<br>(11.75;84.64) | 57.83<br>(18.86;86.94) |
| Ecuador | 33.67<br>(23.24;44.1)  | 57.52<br>(42.87;71.34) | 63.71<br>(50.08;75.9)  |
| Peru    | 39.73<br>(30.11;52.06) | 66.43<br>(50.21;80.28) | 72.11<br>(58.78;83.88) |

#### Caribbean

|                     |                        |                           |                        |
|---------------------|------------------------|---------------------------|------------------------|
| Antigua and Barbuda | 0.04<br>(0.04;0.05)    | 1.79<br>(1.54;2.06)       | 3.09<br>(2.66;3.59)    |
| The Bahamas         | 61.72<br>(49.19;71.17) | 81.8***<br>(73.72;84.67)  | 87.28<br>(81.19;89.94) |
| Barbados            | 78.39<br>(75.24;80.37) | 85.83***<br>(78.85;88.83) | 88.99<br>(83.82;91.3)  |
| Belize              | 42.09<br>(31.72;54.27) | 53.99<br>(43.97;64.59)    | 60.82<br>(52.2;69.96)  |
| Bermuda             | 0.05<br>(0.04;0.06)    | 1.5<br>(1.37;1.65)        | 3.09<br>(2.7;3.49)     |
| Cuba                | 49.7<br>(35.5;71.23)   | 70.61<br>(53.56;83.18)    | 77.73<br>(62.82;88.69) |
| Dominica            | 0.04<br>(0.03;0.05)    | 1.92<br>(1.6;2.27)        | 3.44<br>(2.91;4.01)    |
| Dominican Republic  | 23.54<br>(18.07;29.91) | 51.31<br>(39.15;63.54)    | 60.87<br>(49.51;71.64) |
| Grenada             | 0.04<br>(0.03;0.05)    | 1.88<br>(1.63;2.15)       | 3.5<br>(3.13;3.9)      |
| Guyana              | 35.47<br>(30.92;41.94) | 55.9<br>(49.84;62.95)     | 61.51<br>(55.59;68.18) |
| Haiti               | 19.68<br>(17.2;22.47)  | 62.71<br>(55.58;70.54)    | 71.35<br>(65.37;77.62) |
| Jamaica             | 49.08<br>(39.49;56.72) | 77.98<br>(65.21;84.69)    | 83.36<br>(73.07;88.55) |

|                                  |                        |                           |                        |
|----------------------------------|------------------------|---------------------------|------------------------|
| Puerto Rico                      | 0.05<br>(0.04;0.06)    | 1.42<br>(1.3;1.54)        | 3<br>(2.66;3.38)       |
| Saint Lucia                      | 0.04<br>(0.04;0.05)    | 1.6<br>(1.4;1.82)         | 3.01<br>(2.62;3.44)    |
| Saint Vincent and the Grenadines | 0.04<br>(0.04;0.05)    | 1.77<br>(1.51;2.03)       | 3.35<br>(2.87;3.86)    |
| Suriname                         | 36.13<br>(29.38;43.22) | 76.32<br>(65;83.04)       | 81.85<br>(73.02;87.24) |
| Trinidad and Tobago              | 60.58<br>(51.17;66.53) | 82.52***<br>(73.93;86.27) | 88.1<br>(82.09;90.83)  |
| Virgin Islands                   | 0.04<br>(0.04;0.05)    | 1.59<br>(1.4;1.78)        | 3.26<br>(2.88;3.71)    |

### Central Latin America

|             |                        |                           |                        |
|-------------|------------------------|---------------------------|------------------------|
| Colombia    | 35.26<br>(25.18;46.72) | 77.86<br>(64.61;83.71)    | 83.35<br>(73.07;87.98) |
| Costa Rica  | 57.81<br>(44.06;68.38) | 83.93***<br>(73.2;87.45)  | 86.57<br>(78.56;88.81) |
| El Salvador | 44.55<br>(37.88;52.96) | 58<br>(49.92;68.12)       | 63.56<br>(55.44;73.58) |
| Guatemala   | 55.39<br>(35.36;74.66) | 61.92<br>(39.9;78.49)     | 63.68<br>(44.6;79.09)  |
| Honduras    | 82.63<br>(80.97;83.82) | 85.25***<br>(83.88;86.84) | 87.3<br>(85.79;88.49)  |
| Mexico      | 46.45<br>(35.55;58.36) | 65.86<br>(53.5;78.28)     | 71.03<br>(61.08;81.23) |
| Nicaragua   | 20.41<br>(15.51;26.9)  | 34.37<br>(27.92;42.81)    | 45.29<br>(37.99;54.63) |
| Panama      | 47.6<br>(37.32;56.67)  | 67.19<br>(52.35;79.68)    | 76.79<br>(65.09;85.72) |
| Venezuela   | 62.03<br>(50.14;72.75) | 80.67***<br>(72.09;83.92) | 84.16<br>(78.06;86.45) |

### Tropical Latin America

|          |                       |                        |                        |
|----------|-----------------------|------------------------|------------------------|
| Brazil   | 47<br>(40.79;53.56)   | 57.12<br>(50.73;65.24) | 63.03<br>(57.32;71.46) |
| Paraguay | 27.4<br>(21.95;34.83) | 46.15<br>(38.11;55.68) | 51.75<br>(43.85;62.67) |

### North Africa and Middle East

|             |                        |                        |                        |
|-------------|------------------------|------------------------|------------------------|
| Afghanistan | 4.64<br>(0.47;14.82)   | 33.52<br>(6.28;82.8)   | 42.46<br>(11.28;88.24) |
| Algeria     | 42.79<br>(7.97;80)     | 75.46<br>(37;93.27)    | 79.7<br>(47.78;96.85)  |
| Bahrain     | 32.26<br>(23.65;41.08) | 54.13<br>(40.94;65.39) | 57.28<br>(44.23;67.81) |
| Egypt       | 23.6<br>(16.63;30.43)  | 71.97<br>(61.47;78.62) | 77.88<br>(68.34;83.37) |



|                      |                        |                          |                        |
|----------------------|------------------------|--------------------------|------------------------|
| Iran                 | 19.74<br>(14.05;25.64) | 48.26<br>(41.53;54.87)   | 57.66<br>(50.81;64.77) |
| Iraq                 | 0.02<br>(0.02;0.03)    | 8.5<br>(6.82;10.31)      | 14.13<br>(11.2;17.24)  |
| Jordan               | 38.82<br>(31.85;47.84) | 47.95<br>(36.96;58.83)   | 51.24<br>(40.2;63.49)  |
| Kuwait               | 77.92<br>(72.59;83.74) | 84.6***<br>(80.38;86.01) | 84.74<br>(81.07;86.07) |
| Lebanon              | 53.47<br>(12;83.78)    | 59.75<br>(19.08;84.31)   | 66.69<br>(25.78;88.48) |
| Libya                | 0.01<br>(0.01;0.02)    | 5.24<br>(2.52;8.45)      | 9.98<br>(5.74;14.59)   |
| Morocco              | 40.18<br>(6.22;83.61)  | 73.85<br>(29.61;90.55)   | 77.68<br>(39.04;91.61) |
| Palestine            | 0.02<br>(0.02;0.03)    | 8.15<br>(6.87;9.19)      | 13.83<br>(12.06;15.66) |
| Oman                 | 42.41<br>(33.68;51.36) | 42.75<br>(28.04;65.39)   | 47.56<br>(33.64;70.35) |
| Qatar                | 58.08<br>(50.63;64.39) | 56.39<br>(46.6;63.55)    | 56.89<br>(46.99;64.33) |
| Saudi Arabia         | 0.02<br>(0.01;0.02)    | 3.97<br>(2.3;5.75)       | 6.35<br>(4.68;8.34)    |
| Sudan                | 2.82<br>(2.36;3.34)    | 15.1<br>(11.28;18.86)    | 23.47<br>(18.64;28.7)  |
| Syria                | 16.22<br>(9.78;21.63)  | 61.96<br>(41.26;74.19)   | 72.71<br>(55.16;81.68) |
| Tunisia              | 31.4<br>(5.81;79.56)   | 46.14<br>(11.74;85.82)   | 54.54<br>(17.44;91.35) |
| Turkey               | 46.09<br>(36.87;52.96) | 47.56<br>(33.96;59.62)   | 55.64<br>(42.27;66.87) |
| United Arab Emirates | 0.01<br>(0;0.02)       | 2.24<br>(1.25;4.34)      | 3.31<br>(2.09;7.2)     |
| Yemen                | 25.1<br>(2.77;73.24)   | 50.81<br>(10.24;86.45)   | 57.6<br>(15.02;91.35)  |

### South Asia

|            |                        |                        |                        |
|------------|------------------------|------------------------|------------------------|
| Bangladesh | 19.44<br>(1.72;76.86)  | 43.17<br>(8.92;85.55)  | 50.51<br>(12.95;89.73) |
| Bhutan     | 8.31<br>(0.63;48.01)   | 12.49<br>(2.15;55.73)  | 17.01<br>(4.21;61.54)  |
| India      | 21.76<br>(19.17;24.21) | 73.81<br>(66.61;79.14) | 73.88<br>(66.07;79.4)  |
| Nepal      | 24.33<br>(2.15;86.1)   | 55.18<br>(14.45;89.88) | 57.85<br>(17.46;89.81) |
| Pakistan   | 13.31<br>(1.11;64.58)  | 30.36<br>(4.61;78.03)  | 38.53<br>(7.85;84.8)   |

## Southeast Asia, East Asia, and Oceania

### East Asia

|                            |                        |                       |                       |
|----------------------------|------------------------|-----------------------|-----------------------|
| China                      | 29.04<br>(23.31;34.49) | 38.78<br>(33.41;48.4) | 45.35<br>(40.12;56.1) |
| North Korea                | 29.63<br>(16.85;44.93) | 34.89<br>(14.88;59.2) | 40.14<br>(21.82;65.2) |
| Taiwan (Province of China) | 29.9<br>(22.45;37.06)  | 42.52<br>(35.1;51.73) | 54.66<br>(45.9;65.73) |

### Oceania

|                                |                       |                       |                        |
|--------------------------------|-----------------------|-----------------------|------------------------|
| American Samoa                 | 0<br>(0;0)            | 0.96<br>(0.92;1.02)   | 1.57<br>(1.43;1.77)    |
| Federated States of Micronesia | 0<br>(0;0)            | 1.07<br>(1;1.15)      | 1.99<br>(1.69;2.44)    |
| Fiji                           | 27.77<br>(21.1;33.21) | 56.51<br>(47.2;64.51) | 64.67<br>(55.73;72.29) |
| Guam                           | 0<br>(0;0)            | 1<br>(0.97;1.04)      | 1.64<br>(1.51;1.85)    |
| Kiribati                       | 0<br>(0;0)            | 0.89<br>(0.87;0.91)   | 1.32<br>(1.21;1.48)    |
| Marshall Islands               | 0<br>(0;0)            | 0.95<br>(0.88;1.04)   | 1.54<br>(1.34;1.81)    |
| Northern Mariana Islands       | 0<br>(0;0)            | 1.03<br>(0.99;1.09)   | 2.12<br>(1.85;2.45)    |
| Papua New Guinea               | 22.23<br>(7.02;76.88) | 69.6<br>(29.96;89.8)  | 73.77<br>(37.57;90.38) |
| Samoa                          | 0<br>(0;0)            | 0.93<br>(0.84;1.02)   | 1.47<br>(1.23;1.8)     |
| Solomon Islands                | 0<br>(0;0)            | 0.92<br>(0.84;1.01)   | 1.42<br>(1.23;1.67)    |
| Tonga                          | 0<br>(0;0)            | 0.94<br>(0.9;1)       | 1.47<br>(1.35;1.65)    |
| Vanuatu                        | 0<br>(0;0)            | 0.94<br>(0.85;1.05)   | 1.54<br>(1.3;2.01)     |

### Southeast Asia

|           |                        |                        |                        |
|-----------|------------------------|------------------------|------------------------|
| Cambodia  | 46.3<br>(36.47;61.92)  | 77.74<br>(62.6;89.18)  | 85.08<br>(70.85;94.8)  |
| Indonesia | 20.89<br>(14.53;27.07) | 50.72<br>(39.16;61.13) | 59.17<br>(44.51;70.92) |
| Laos      | 44.74<br>(3.09;85.73)  | 66.98<br>(13.44;89.91) | 71.03<br>(19.69;90.19) |
| Malaysia  | 35.08<br>(28.22;42.22) | 79.27<br>(69.92;83.88) | 83.23<br>(74.5;87.53)  |
| Maldives  | 28.25<br>(22.86;32.78) | 31.98<br>(23;40.13)    | 39.58<br>(32.2;46.08)  |

|             |                        |                          |                        |
|-------------|------------------------|--------------------------|------------------------|
| Mauritius   | 35.83<br>(26.73;46.45) | 83.36***<br>(74.6;86.22) | 86.71<br>(80.77;89.15) |
| Myanmar     | 11.63<br>(10.2;13.23)  | 69.62<br>(63.22;76.41)   | 74.05<br>(68.19;79.76) |
| Philippines | 1.72<br>(0.98;2.56)    | 24.37<br>(13.26;38.39)   | 34.24<br>(20.81;49.71) |
| Sri Lanka   | 21.18<br>(14.48;28.05) | 62.56<br>(53.34;72.19)   | 70.58<br>(62.33;79.06) |
| Seychelles  | 0.02<br>(0.01;0.02)    | 2.7<br>(2.2;3.26)        | 8.17<br>(7.37;8.97)    |
| Thailand    | 41.01<br>(36.19;46.49) | 67.72<br>(59.26;73.68)   | 73.75<br>(67.18;78.92) |
| Timor-Leste | 0.01<br>(0.01;0.03)    | 7.04<br>(2.72;14.42)     | 14.08<br>(7.47;28.52)  |
| Vietnam     | 20.29<br>(14.38;25.53) | 42.23<br>(31.81;50.23)   | 51.29<br>(41.01;58.63) |

### Sub-Saharan Africa

#### Central sub-Saharan Africa

|                          |                        |                           |                        |
|--------------------------|------------------------|---------------------------|------------------------|
| Angola                   | 8.96<br>(6.83;11.5)    | 30.75<br>(24.54;37.76)    | 40.18<br>(32.39;50.15) |
| Central African Republic | 8.85<br>(7.75;10.05)   | 33.97<br>(26.35;43.5)     | 43.77<br>(33.72;58.09) |
| Congo (Brazzaville)      | 16.16<br>(13.34;19.18) | 31.94<br>(26.75;37.85)    | 39.48<br>(33.6;45.89)  |
| DR Congo                 | 7.64<br>(6.39;9.01)    | 53.02<br>(42.66;63.17)    | 63.3<br>(51.05;76.61)  |
| Equatorial Guinea        | 10.88<br>(9.21;12.74)  | 46.67<br>(33.95;59.22)    | 59.48<br>(45.66;72.21) |
| Gabon                    | 27.14<br>(22.06;32.88) | 84.83***<br>(75.52;90.38) | 88.29<br>(81.67;93.09) |

#### Eastern sub-Saharan Africa

|            |                        |                          |                        |
|------------|------------------------|--------------------------|------------------------|
| Burundi    | 17.25<br>(14.71;19.7)  | 65.35<br>(51.96;77.09)   | 70.41<br>(56.37;83.22) |
| Comoros    | 63.36<br>(10.11;91.44) | 63.75<br>(14.74;81.54)   | 70.51<br>(20.23;86.54) |
| Djibouti   | 8.58<br>(5.95;11.84)   | 29.11<br>(19.17;42.53)   | 39.28<br>(27.84;53.82) |
| Eritrea    | 12.61<br>(10.29;15.22) | 37.09<br>(27.59;48.26)   | 46.73<br>(35.07;61.93) |
| Ethiopia   | 27.77<br>(23.44;32.11) | 80.74***<br>(68.8;89.15) | 81.34<br>(69.2;91.35)  |
| Kenya      | 24.48<br>(22.16;26.83) | 56.93<br>(48.85;62.95)   | 65.9<br>(58.78;70.87)  |
| Madagascar | 0.71<br>(0.58;0.85)    | 10.12<br>(4.24;16.48)    | 17.86<br>(11.6;26.33)  |

|             |                        |                           |                          |
|-------------|------------------------|---------------------------|--------------------------|
| Malawi      | 22.21<br>(19.97;24.48) | 72.19<br>(65.16;78.52)    | 79.82<br>(72.7;86.5)     |
| Mozambique  | 11.81<br>(10.45;13.18) | 54.78<br>(46.8;63.78)     | 64.52<br>(57;72.51)      |
| Rwanda      | 44.1<br>(39.64;48.54)  | 81.98***<br>(73.7;87.98)  | 85.4<br>(78.32;90.26)    |
| Somalia     | 3.49<br>(0.53;12.13)   | 26.5<br>(5.01;69.72)      | 33.4<br>(10.64;74.09)    |
| South Sudan | 5.21<br>(0.72;24.85)   | 47.37<br>(12.68;89.13)    | 57.12<br>(23.51;90.58)   |
| Tanzania    | 16.27<br>(13.35;19.72) | 73.74<br>(60.08;85.1)     | 80.77<br>(67.46;92.68)   |
| Uganda      | 19.55<br>(17.2;22.47)  | 78<br>(67.17;84.54)       | 84.1<br>(75.05;91.72)    |
| Zambia      | 31.54<br>(28.69;34.27) | 86.63***<br>(78.72;92.37) | 91.75***<br>(85.5;96.33) |

#### Southern sub-Saharan Africa

|              |                        |                           |                           |
|--------------|------------------------|---------------------------|---------------------------|
| Botswana     | 49.49<br>(45.08;53.91) | 87.42***<br>(83.04;90.89) | 90.82***<br>(87.68;93.5)  |
| Lesotho      | 27.34<br>(24.91;29.68) | 70.91<br>(66.28;75.49)    | 82.03<br>(79.37;84.59)    |
| Namibia      | 37.4<br>(33.66;41.18)  | 81.23***<br>(73.35;88.57) | 90.01***<br>(84.55;95.26) |
| South Africa | 17.86<br>(16.64;19.13) | 72.76<br>(67.93;77.93)    | 84.71<br>(78.92;90.43)    |
| Swaziland    | 26.97<br>(24.77;29.34) | 94.47***<br>(89.28;97.49) | 97.36***<br>(93.88;99.35) |
| Zimbabwe     | 25.16<br>(20.96;29.99) | 85.43***<br>(76.29;92.83) | 88.55<br>(80.79;97.26)    |

#### Western sub-Saharan Africa

|               |                        |                        |                        |
|---------------|------------------------|------------------------|------------------------|
| Benin         | 31.03<br>(26.62;36.19) | 60.09<br>(51.04;69.98) | 66.42<br>(57.19;76.85) |
| Burkina Faso  | 28.03<br>(23.49;34.21) | 68.61<br>(56.88;78.83) | 74.28<br>(61.37;87.92) |
| Cameroon      | 14.97<br>(13.38;16.7)  | 43.52<br>(36.74;51.62) | 53.4<br>(45.46;64.39)  |
| Cape Verde    | 16.01<br>(12.3;20.24)  | 45.28<br>(35.44;55.65) | 55.85<br>(45.76;66.29) |
| Chad          | 23.26<br>(17.34;29.83) | 47.26<br>(37.6;57.75)  | 54.87<br>(44.68;66.53) |
| Cote d'Ivoire | 18.7<br>(14.02;25.86)  | 47.15<br>(36.44;61.98) | 55.87<br>(44.89;74.12) |
| The Gambia    | 8.04<br>(6.12;10.16)   | 35.96<br>(27.51;46.44) | 45.18<br>(35.24;59.19) |
| Ghana         | 11.22<br>(9.57;13)     | 39.98<br>(33.17;47.38) | 50.79<br>(43.36;58.75) |

|                       |                        |                           |                        |
|-----------------------|------------------------|---------------------------|------------------------|
| Guinea                | 18.97<br>(15.85;22.72) | 57.75<br>(46.62;71.46)    | 63.01<br>(51.68;75.67) |
| Guinea-Bissau         | 9.14<br>(7.2;11.47)    | 41.35<br>(31.12;54.36)    | 49.35<br>(37.8;64.13)  |
| Liberia               | 9.98<br>(8.39;11.59)   | 31.86<br>(24.2;40.4)      | 37.5<br>(29.16;47.75)  |
| Mali                  | 21.31<br>(18.29;25.09) | 42.3<br>(36.07;49.36)     | 47.93<br>(40.89;55.43) |
| Mauritania            | 79.76<br>(35.98;89.89) | 80.82***<br>(45.12;90.06) | 81.93<br>(48.89;91.44) |
| Niger                 | 12.93<br>(10.91;15.13) | 41.83<br>(34.75;49.27)    | 46.83<br>(39.07;54.98) |
| Nigeria               | 14.26<br>(12.71;15.74) | 38.41<br>(33.27;43.43)    | 46.56<br>(40.47;52.8)  |
| Sao Tome and Principe | 87.69<br>(83.94;91.37) | 83.86***<br>(79.02;89.83) | 83.24<br>(79.26;88.74) |
| Senegal               | 23.51<br>(19.6;27.94)  | 48.39<br>(40.49;58.1)     | 51.68<br>(43.62;60.9)  |
| Sierra Leone          | 8.39<br>(6.97;10.11)   | 40.34<br>(31.24;53.38)    | 49.75<br>(38.76;67.7)  |
| Togo                  | 13.95<br>(11.38;16.88) | 59.65<br>(48.94;70.51)    | 68.16<br>(56.42;82.73) |

Appendix Table 2: Forecast number of deaths and percent change between 2010-2020 and 2010-2030

|                                                         | 2010 (95% UI)                |  | 2020 (95% UI)                  |                           | 2030 (95% UI)                   |                           |
|---------------------------------------------------------|------------------------------|--|--------------------------------|---------------------------|---------------------------------|---------------------------|
|                                                         | Number of cases              |  | Number of cases                | Percent Change            | Number of cases                 | Percent Change            |
| <b>Central Europe, Eastern Europe, and Central Asia</b> |                              |  |                                |                           |                                 |                           |
| <b>Central Asia</b>                                     |                              |  |                                |                           |                                 |                           |
| Armenia                                                 | 11.76<br>(11.16;12.38)       |  | 24.68<br>(20.04;28.68)         | 109.8<br>(72.06;145.92)   | 33.38<br>(24.8;42.32)           | 183.77<br>(108.02;265.01) |
| Azerbaijan                                              | 43.96<br>(33.55;56.63)       |  | 38.09<br>(28.77;45.82)         | -13.35<br>(-40.11;29.25)  | 55.77<br>(33.95;72.79)          | 26.86<br>(-23.85;96.86)   |
| Georgia                                                 | 14.48<br>(13.81;15.16)       |  | 38.68<br>(11.66;47.16)         | 167.15<br>(-20.88;231.21) | 57.11<br>(18.11;73.25)          | 294.41<br>(25.93;412.24)  |
| Kazakhstan                                              | 303.99<br>(293.24;315.3)     |  | 287.15<br>(237.89;335.52)      | -5.54<br>(-21.74;10.63)   | 510.62<br>(292.61;710.2)        | 67.97<br>(-3.23;132.6)    |
| Kyrgyzstan                                              | 123.97<br>(119.23;128.59)    |  | 191.82<br>(161.97;222.85)      | 54.73<br>(31;80.35)       | 261.88<br>(200.51;341.68)       | 111.24<br>(60.74;177.87)  |
| Mongolia                                                | 8.46<br>(3.81;14.47)         |  | 25.49<br>(5.48;51.77)          | 201.3<br>(17.98;355.08)   | 41.39<br>(11.61;84.48)          | 389.24<br>(123.71;805.95) |
| Tajikistan                                              | 113.47<br>(100.42;126.6)     |  | 64.7<br>(43.69;88.03)          | -42.98<br>(-62.37;-17.11) | 101.39<br>(52.19;153.67)        | -10.65<br>(-55.87;42.39)  |
| Turkmenistan                                            | 120.65<br>(115.41;126.15)    |  | 108.44<br>(101.79;115.46)      | -10.12<br>(-16.56;-2.65)  | 155.92<br>(133.4;185.91)        | 29.23<br>(9.59;56.63)     |
| Uzbekistan                                              | 536.49<br>(518.24;554.68)    |  | 626.2<br>(532.11;738.82)       | 16.72<br>(-2.15;37.41)    | 809.26<br>(536.42;1141.11)      | 50.84<br>(0.11;111.96)    |
| <b>Central Europe</b>                                   |                              |  |                                |                           |                                 |                           |
| Albania                                                 | 1.79<br>(1.69;1.89)          |  | 1.14<br>(0.94;1.38)            | -36.34<br>(-46.37;-25.34) | 1.31<br>(0.97;1.63)             | -26.46<br>(-45.42;-10.95) |
| Bosnia and Herzegovina                                  | 2.26<br>(2.03;2.49)          |  | 1.37<br>(1.16;1.61)            | -39.35<br>(-47.8;-30.9)   | 1.62<br>(1.32;1.92)             | -27.99<br>(-41.13;-16.7)  |
| Bulgaria                                                | 72.83<br>(70.15;75.82)       |  | 44.22<br>(38.75;49.85)         | -39.27<br>(-47.09;-31.12) | 41.91<br>(26.82;54.95)          | -42.46<br>(-63.3;-23.79)  |
| Croatia                                                 | 12.6<br>(12.12;13.1)         |  | 8.17<br>(6.77;9.17)            | -35.19<br>(-46.55;-26.73) | 8.15<br>(4.87;10.56)            | -35.29<br>(-61.26;-15.77) |
| Czech Republic                                          | 18.6<br>(17.9;19.31)         |  | 23.42<br>(20.93;26.1)          | 25.92<br>(11.24;41.14)    | 25.63<br>(19.8;30.76)           | 37.76<br>(6.19;66.19)     |
| Hungary                                                 | 66.93<br>(64.05;70.08)       |  | 32.41<br>(25.44;39.57)         | -51.59<br>(-62.31;-40.49) | 36.1<br>(19.18;53.23)           | -46.06<br>(-71.56;-19.96) |
| Macedonia                                               | 2.01<br>(1.65;2.43)          |  | 1.61<br>(1.26;1.93)            | -19.65<br>(-33.57;-6.29)  | 1.66<br>(1.17;2.07)             | -17.51<br>(-39.6;2.39)    |
| Montenegro                                              | 1.45<br>(1.2;1.73)           |  | 1.07<br>(0.78;1.41)            | -26.25<br>(-47.67;-3.09)  | 1.05<br>(0.72;1.44)             | -27.49<br>(-51.25;-0.35)  |
| Poland                                                  | 168.51<br>(162.78;174.8)     |  | 141.23<br>(121.67;156.99)      | -16.19<br>(-28.13;-6.05)  | 137.19<br>(94.99;166.72)        | -18.59<br>(-43.67;0.04)   |
| Romania                                                 | 111.42<br>(107.66;115.04)    |  | 109.62<br>(68.14;164.69)       | -1.62<br>(-39.37;48.33)   | 103.84<br>(57.97;187.52)        | -6.8<br>(-48.34;66.9)     |
| Serbia                                                  | 62.72<br>(41.5;139.8)        |  | 56.27<br>(14.3;140.92)         | -10.28<br>(-69.53;60.29)  | 48.92<br>(8.06;129.08)          | -22.01<br>(-81.7;48.95)   |
| Slovakia                                                | 3.85<br>(3.21;4.51)          |  | 3.96<br>(2.7;5.12)             | 2.72<br>(-25.11;21.44)    | 4.39<br>(2.42;5.92)             | 13.87<br>(-31.6;42.97)    |
| Slovenia                                                | 1.3<br>(1.24;1.35)           |  | 2.22<br>(1.76;2.52)            | 71.69<br>(35.21;95.88)    | 2.17<br>(1.3;2.88)              | 67.17<br>(1.01;122.88)    |
| <b>Eastern Europe</b>                                   |                              |  |                                |                           |                                 |                           |
| Belarus                                                 | 360.07<br>(345.92;373.97)    |  | 314.93<br>(235.14;390.55)      | -12.54<br>(-34.63;8.58)   | 535.67<br>(330.97;888.68)       | 48.77<br>(-8.81;146.82)   |
| Estonia                                                 | 42.23<br>(40;44.67)          |  | 36.78<br>(32.35;40.07)         | -12.91<br>(-23.66;-3.53)  | 34.89<br>(22.63;41.43)          | -17.39<br>(-46.35;-1.08)  |
| Latvia                                                  | 127.6<br>(122.62;132.6)      |  | 112.76<br>(102.27;125.25)      | -11.63<br>(-20.5;-0.68)   | 136.08<br>(100.28;164.04)       | 6.64<br>(-21.34;29)       |
| Lithuania                                               | 86.8<br>(82.82;90.94)        |  | 54.06<br>(43.96;63.29)         | -37.71<br>(-49.85;-25.95) | 52.58<br>(26.98;69.96)          | -39.42<br>(-68.9;-18.99)  |
| Moldova                                                 | 216.06<br>(206.32;225.7)     |  | 148.52<br>(110.61;179.97)      | -31.26<br>(-49.2;-16.12)  | 206.14<br>(158.83;261.64)       | -4.59<br>(-26.45;21.4)    |
| Russian Federation                                      | 12189.47<br>(12111.77;12268) |  | 21794.62<br>(19635.27;24520.3) | 78.8<br>(60.73;101.26)    | 38904.42<br>(30026.56;49570.05) | 219.16<br>(146.28;307.44) |
| Ukraine                                                 | 8611.58<br>(8429.82;8793.75) |  | 4639.95<br>(3714.91;5538.06)   | -46.12<br>(-57.02;-35.69) | 6871.41<br>(3845.82;8900)       | -20.21<br>(-55.45;3.32)   |
| <b>High-income</b>                                      |                              |  |                                |                           |                                 |                           |
| <b>Australasia</b>                                      |                              |  |                                |                           |                                 |                           |
| Australia                                               | 85.59<br>(83.19;88.27)       |  | 75.68<br>(70.89;79.75)         | -11.58<br>(-17.96;-6.08)  | 85.27<br>(76.79;93.74)          | -0.38<br>(-11.1;9.91)     |
| New Zealand                                             | 15.93<br>(15.39;16.48)       |  | 9.31<br>(8.04;10.41)           | -41.55<br>(-49.48;-34.37) | 11.88<br>(8.57;14.34)           | -25.42<br>(-46.01;-9.27)  |
| <b>High-income Asia-Pacific</b>                         |                              |  |                                |                           |                                 |                           |
| Brunei                                                  | 4.96<br>(4.56;5.32)          |  | 4.7<br>(3.87;5.53)             | -5.25<br>(-20.57;9.73)    | 5.39<br>(3.94;6.8)              | 8.61<br>(-20.12;34.56)    |

|                                    |                              |                              |                           |                              |                           |
|------------------------------------|------------------------------|------------------------------|---------------------------|------------------------------|---------------------------|
| Japan                              | 237.09<br>(233.7;240.52)     | 198.64<br>(194.26;202.88)    | -16.22<br>(-18.55;-14.1)  | 193.44<br>(182.33;201.94)    | -18.41<br>(-23.58;-14.52) |
| South Korea                        | 157.77<br>(150.21;166.41)    | 142.87<br>(75.07;201.09)     | -9.44<br>(-52.91;28.55)   | 151.95<br>(25.51;309.7)      | -3.69<br>(-84.38;96.34)   |
| Singapore                          | 35.26<br>(32.95;37.53)       | 23.07<br>(14.36;35.8)        | -34.57<br>(-59.91;1.18)   | 20.34<br>(11.32;41.02)       | -42.3<br>(-68.22;17.05)   |
| <b>High-income North America</b>   |                              |                              |                           |                              |                           |
| Canada                             | 334.77<br>(322.51;347.76)    | 263.77<br>(214.03;293.95)    | -21.21<br>(-35.83;-11.48) | 317.33<br>(228.68;375.33)    | -5.21<br>(-32.2;12.11)    |
| Greenland                          | 2.79<br>(2.44;3.07)          | 1.51<br>(1.2;03)             | -45.84<br>(-63.96;-29.78) | 1.55<br>(0.95;2.23)          | -44.7<br>(-65.4;-20.5)    |
| USA                                | 9065.41<br>(8997.77;9134.48) | 6885.81<br>(6121.15;7475.24) | -24.04<br>(-32.3;-17.47)  | 6162.75<br>(4110.4;7977.87)  | -32.02<br>(-54.69;-11.95) |
| <b>Southern Latin America</b>      |                              |                              |                           |                              |                           |
| Argentina                          | 1569.32<br>(1543.54;1597.42) | 1228.1<br>(1061.2;1479.11)   | -21.74<br>(-32.37;-6.05)  | 1006.19<br>(735.02;1517.93)  | -35.88<br>(-53.36;-3.19)  |
| Chile                              | 455.1<br>(445.74;463.84)     | 436.75<br>(341.41;539.42)    | -4.03<br>(-25.22;18.85)   | 455.29<br>(317.78;629.55)    | 0.04<br>(-30.74;38.04)    |
| Uruguay                            | 194.55<br>(190.63;198.81)    | 155.71<br>(139.41;177.51)    | -19.97<br>(-28.52;-8.58)  | 155.08<br>(119.85;197.65)    | -20.29<br>(-38.53;1.27)   |
| <b>Western Europe</b>              |                              |                              |                           |                              |                           |
| Andorra                            | 0.91<br>(0.09;3.86)          | 0.45<br>(0.06;1.93)          | -50.09<br>(-62.83;-19.43) | 0.42<br>(0.04;1.9)           | -53.38<br>(-72.1;-20.83)  |
| Austria                            | 45.8<br>(43.79;47.88)        | 39.12<br>(33.68;43.98)       | -14.6<br>(-27.51;-2.68)   | 43.27<br>(33.92;52.39)       | -5.53<br>(-26.2;14.18)    |
| Belgium                            | 84.85<br>(81.84;88.11)       | 62.6<br>(56.79;67.45)        | -26.23<br>(-33.36;-19.53) | 64.99<br>(51.77;73.97)       | -23.41<br>(-39.81;-12.52) |
| Cyprus                             | 2.43<br>(2.14;2.71)          | 2.08<br>(1.8;2.36)           | -14.49<br>(-29.21;2.48)   | 2.64<br>(2.2;3.08)           | 8.41<br>(-13.02;32.64)    |
| Denmark                            | 42.25<br>(40.46;44.05)       | 20.29<br>(11.6;29.26)        | -51.98<br>(-72.54;-30.18) | 23.42<br>(13.94;33.12)       | -44.56<br>(-66.61;-21.96) |
| Finland                            | 12.32<br>(11.77;12.88)       | 6.21<br>(5.44;6.82)          | -49.6<br>(-56.21;-44.36)  | 6.2<br>(4.56;7.32)           | -49.67<br>(-63.45;-40.08) |
| France                             | 592.8<br>(574.81;609.68)     | 270.47<br>(158.58;415.98)    | -54.37<br>(-73.3;-29.85)  | 236.13<br>(155.41;362.06)    | -60.17<br>(-74.05;-39.08) |
| Germany                            | 574.01<br>(554.65;591.42)    | 466.18<br>(416.33;499.17)    | -18.78<br>(-27.55;-12.13) | 498.86<br>(409.37;568.37)    | -13.09<br>(-28.54;-0.37)  |
| Greece                             | 23.04<br>(22.03;24.09)       | 30.42<br>(28.82;32.06)       | 32.04<br>(22.6;42)        | 31.49<br>(28.77;36.51)       | 36.67<br>(22.94;59.06)    |
| Iceland                            | 1.15<br>(1.09;1.21)          | 0.96<br>(0.83;1.08)          | -16.14<br>(-28.38;-4.59)  | 1.25<br>(0.89;1.53)          | 8.38<br>(-21.62;33.6)     |
| Ireland                            | 13.49<br>(12.86;14.19)       | 9.47<br>(8.01;10.81)         | -29.77<br>(-41.26;-19.51) | 9.84<br>(6.61;12.24)         | -27.04<br>(-52.33;-8.32)  |
| Israel                             | 33.52<br>(32.26;34.86)       | 46.09<br>(41.69;50.76)       | 37.5<br>(24.26;52.02)     | 56.26<br>(47.8;63.6)         | 67.84<br>(42.26;90.98)    |
| Italy                              | 833.98<br>(809.97;856.6)     | 638.34<br>(581.48;690.36)    | -23.46<br>(-30.46;-16.55) | 669.93<br>(579.83;769.6)     | -19.67<br>(-30.59;-7.26)  |
| Luxembourg                         | 2.61<br>(2.49;2.74)          | 2.6<br>(2.21;2.86)           | -0.39<br>(-15.79;11.01)   | 3.04<br>(2.22;3.54)          | 16.24<br>(-15.15;37.06)   |
| Malta                              | 1.9<br>(1.81;1.99)           | 1.28<br>(0.91;1.82)          | -32.49<br>(-52.85;-3.43)  | 1.58<br>(1.17;2.19)          | -17.18<br>(-39.33;15.53)  |
| Netherlands                        | 61.89<br>(59.3;64.5)         | 43.14<br>(21.11;56.5)        | -30.29<br>(-66.17;-8.49)  | 37.22<br>(12.02;55.22)       | -39.86<br>(-80.69;-10.32) |
| Norway                             | 16.96<br>(16.61;17.33)       | 14.91<br>(13.42;16.1)        | -12.1<br>(-20.92;-4.62)   | 16.71<br>(13.48;18.98)       | -1.5<br>(-20.07;12.39)    |
| Portugal                           | 714.06<br>(690.42;737.83)    | 488.89<br>(440.82;522.5)     | -31.53<br>(-38.86;-26.29) | 453.12<br>(367.48;508.45)    | -36.54<br>(-49.13;-28.49) |
| Spain                              | 1050.85<br>(1016.79;1086.3)  | 467.74<br>(264.51;694.08)    | -55.49<br>(-74.92;-33.57) | 365.2<br>(204.08;589.65)     | -65.25<br>(-80.61;-43.32) |
| Sweden                             | 25.29<br>(24.61;26.01)       | 23.09<br>(19.95;25.6)        | -8.73<br>(-21.06;1.65)    | 24.9<br>(18.47;29.26)        | -1.54<br>(-27.04;16.2)    |
| Switzerland                        | 47.83<br>(45.74;49.99)       | 32.59<br>(26.37;36.47)       | -31.85<br>(-44.95;-22.62) | 31.9<br>(20.7;38.67)         | -33.31<br>(-56.59;-18.81) |
| United Kingdom                     | 342.74<br>(340.87;344.99)    | 255.09<br>(237.16;268.68)    | -25.57<br>(-30.82;-21.55) | 284.7<br>(255.74;307.9)      | -16.94<br>(-25.47;-10.15) |
| <b>Latin America and Caribbean</b> |                              |                              |                           |                              |                           |
| <b>Andean Latin America</b>        |                              |                              |                           |                              |                           |
| Bolivia                            | 939.36<br>(79.52;3507.03)    | 1293.4<br>(50.67;6106.27)    | 37.69<br>(-72.33;170.06)  | 1712.49<br>(69.24;7477.4)    | 82.3<br>(-65.88;647.35)   |
| Ecuador                            | 958.35<br>(928.92;990.42)    | 1060.12<br>(973.88;1149.66)  | 10.62<br>(0.72;20.74)     | 1345.87<br>(1205.42;1506.12) | 40.44<br>(25.03;57.61)    |
| Peru                               | 1518.11<br>(1320.27;1825.04) | 2333.02<br>(1113.88;3693.53) | 53.68<br>(-21.56;116.4)   | 2586.33<br>(1212.43;4177.76) | 70.37<br>(-13.53;147.15)  |
| <b>Caribbean</b>                   |                              |                              |                           |                              |                           |
| Antigua and Barbuda                | 7.6<br>(7.45;7.73)           | 7.87<br>(7.57;8.25)          | 3.6<br>(-0.58;8.83)       | 10.08<br>(8.99;11.75)        | 32.65<br>(18.36;55.38)    |
| The Bahamas                        | 116.17<br>(114.06;118.46)    | 100.81<br>(87.11;120.04)     | -13.23<br>(-24.98;3.36)   | 110.27<br>(79.29;141.79)     | -5.09<br>(-31.52;21.48)   |
| Barbados                           | 30.1<br>(29.51;30.7)         | 20.36<br>(16.84;23.65)       | -32.33<br>(-44.04;-21.17) | 16.73<br>(11.51;21.58)       | -44.41<br>(-61.53;-27.71) |
| Belize                             | 75.47<br>(74.13;76.85)       | 81.58<br>(74.26;90.29)       | 8.08<br>(-2.1;19.8)       | 108.51<br>(86.27;124.8)      | 43.78<br>(14.67;65.75)    |
| Bermuda                            | 7.22<br>(7.08;7.36)          | 6.82<br>(6.59;7.08)          | -5.45<br>(-9.02;-1.28)    | 8.26<br>(7.52;9.15)          | 14.39<br>(3.87;27.29)     |

|                                     |                                 |                                 |                           |                                 |                            |
|-------------------------------------|---------------------------------|---------------------------------|---------------------------|---------------------------------|----------------------------|
| Cuba                                | 226.67<br>(221.9;231.46)        | 411.89<br>(343.02;500.66)       | 81.71<br>(51.26;121.66)   | 519.94<br>(389.45;773.75)       | 129.38<br>(70.54;246.1)    |
| Dominica                            | 5.16<br>(5.06;5.26)             | 5.33<br>(5.02;5.81)             | 3.31<br>(-3.17;12.84)     | 6.59<br>(5.65;8.34)             | 27.69<br>(8.98;61.81)      |
| Dominican Republic                  | 3430.14<br>(2607.57;4594.14)    | 2233.97<br>(1389.59;3365.06)    | -34.87<br>(-50.65;-21.63) | 1814.65<br>(756.06;3206.28)     | -47.1<br>(-73.06;-25.35)   |
| Grenada                             | 6.48<br>(6.36;6.61)             | 6.26<br>(6.05;6.51)             | -3.49<br>(-7.44;0.76)     | 7.38<br>(6.52;8.35)             | 13.87<br>(0.46;28.7)       |
| Guyana                              | 216.36<br>(212.58;220.59)       | 176.17<br>(146.95;208.78)       | -18.58<br>(-32.29;-3.55)  | 176.45<br>(132.29;232.07)       | -18.45<br>(-38.85;7.3)     |
| Haiti                               | 8076.39<br>(6776.91;9867.04)    | 3514.27<br>(2681.38;4527.81)    | -56.49<br>(-63.63;-48.52) | 2943.66<br>(1962.82;4165.46)    | -63.55<br>(-74;-52.43)     |
| Jamaica                             | 611.79<br>(601.85;621.95)       | 411.25<br>(355.66;453.31)       | -32.78<br>(-41.66;-25.73) | 421.82<br>(329.75;478.2)        | -31.05<br>(-46.15;-21.55)  |
| Puerto Rico                         | 358.72<br>(352.28;365.46)       | 213.71<br>(181.77;232.34)       | -40.43<br>(-49.15;-35.07) | 227.2<br>(143.16;273.55)        | -36.67<br>(-59.81;-23.19)  |
| Saint Lucia                         | 8.12<br>(7.97;8.26)             | 7.87<br>(7.58;8.22)             | -3.12<br>(-7.31;1.53)     | 9.36<br>(8.32;10.74)            | 15.29<br>(2.64;31.8)       |
| Saint Vincent and the Grenadines    | 20.89<br>(20.49;21.3)           | 19.83<br>(19.05;20.73)          | -5.05<br>(-9.15;-0.35)    | 21.4<br>(19.14;24.33)           | 2.44<br>(-8.63;16.09)      |
| Suriname                            | 120.34<br>(118.18;122.54)       | 83.6<br>(74.41;91.92)           | -30.53<br>(-38.52;-23.6)  | 66.21<br>(47.93;88.42)          | -44.98<br>(-60.48;-26.42)  |
| Trinidad and Tobago                 | 226.68<br>(222.87;230.86)       | 164.51<br>(149.01;180.27)       | -27.43<br>(-34.12;-20.48) | 117.51<br>(87.44;149.55)        | -48.16<br>(-61.56;-34.05)  |
| Virgin Islands                      | 10.01<br>(9.83;10.19)           | 9.78<br>(8.75;11.08)            | -2.35<br>(-13.08;11.18)   | 12.62<br>(9.61;17.15)           | 26.08<br>(-3.79;71.09)     |
| <b>Central Latin America</b>        |                                 |                                 |                           |                                 |                            |
| Colombia                            | 2797.59<br>(2733.2;2864.6)      | 2659.99<br>(2276.16;2917.04)    | -4.92<br>(-18.54;4.62)    | 3103.18<br>(2424.88;3515.17)    | 10.92<br>(-13.34;25.53)    |
| Costa Rica                          | 157.05<br>(151.3;163.5)         | 138.78<br>(111.41;157.29)       | -11.63<br>(-29.13;1.41)   | 134.85<br>(78.65;169.87)        | -14.13<br>(-50.7;9.35)     |
| El Salvador                         | 665.93<br>(457.91;904.55)       | 722.66<br>(304.79;1061.45)      | 8.52<br>(-34.87;33.98)    | 682.7<br>(217.8;1070.03)        | 2.52<br>(-52.8;33.74)      |
| Guatemala                           | 756.27<br>(735.96;775.05)       | 739.13<br>(616.92;843.04)       | -2.27<br>(-18.87;12.24)   | 973.61<br>(606.36;1359.68)      | 28.74<br>(-19.44;80.41)    |
| Honduras                            | 86.17<br>(71.55;108.69)         | 78.02<br>(58.67;101.79)         | -9.46<br>(-29.62;10.89)   | 88.54<br>(60.93;122.23)         | 2.75<br>(-27.45;35.76)     |
| Mexico                              | 5734.4<br>(5687.89;5782.66)     | 5692.38<br>(5364.49;6078.03)    | -0.73<br>(-6.47;5.98)     | 7413.67<br>(6476.18;8048.81)    | 29.28<br>(13.02;40.46)     |
| Nicaragua                           | 269.79<br>(192.22;333.76)       | 700.7<br>(411.13;978.62)        | 159.72<br>(90.1;248.89)   | 1036.59<br>(658.02;1469.39)     | 284.22<br>(171.89;430.33)  |
| Panama                              | 550.87<br>(532.91;567.68)       | 457.25<br>(414.29;508.66)       | -17<br>(-25.34;-7.09)     | 512.39<br>(440.88;601.32)       | -6.99<br>(-20.79;10.38)    |
| Venezuela                           | 1938.11<br>(1892.25;1985.88)    | 2079.13<br>(1608.82;2348.36)    | 7.28<br>(-17.59;21.93)    | 2404.36<br>(1497.02;2906.45)    | 24.06<br>(-23.59;51.05)    |
| <b>Tropical Latin America</b>       |                                 |                                 |                           |                                 |                            |
| Brazil                              | 15274.42<br>(15125.54;15420.65) | 15166.73<br>(14040.07;16700.74) | -0.71<br>(-7.91;9.58)     | 20953.11<br>(15334.27;23966.54) | 37.18<br>(0.17;57.3)       |
| Paraguay                            | 464.91<br>(300;590.44)          | 796.92<br>(427;1117.66)         | 71.41<br>(27.21;116.8)    | 980.35<br>(511.08;1385.49)      | 110.87<br>(52.27;174.57)   |
| <b>North Africa and Middle East</b> |                                 |                                 |                           |                                 |                            |
| Afghanistan                         | 169.04<br>(15.05;691.79)        | 426.11<br>(10.59;1859.85)       | 152.08<br>(-65.27;654.57) | 735.5<br>(20.08;2803.24)        | 335.12<br>(-41.08;2918.83) |
| Algeria                             | 355.24<br>(16.99;1926.41)       | 356.2<br>(19.09;2017.98)        | 0.27<br>(-73.54;136.92)   | 451.83<br>(11.11;2416.23)       | 27.19<br>(-83.34;638.43)   |
| Bahrain                             | 13.92<br>(12.71;14.9)           | 11.07<br>(8.89;13.35)           | -20.44<br>(-31.83;-3.49)  | 15.98<br>(11.68;20.3)           | 14.82<br>(-12.4;44.9)      |
| Egypt                               | 104.44<br>(90.7;118.47)         | 71.5<br>(50.11;101.16)          | -31.54<br>(-46.12;-12.47) | 101.98<br>(64.71;148.88)        | -2.36<br>(-33.54;31.6)     |
| Iran                                | 452.24<br>(430.97;473.58)       | 892.01<br>(765.35;1018.78)      | 97.24<br>(72.27;122.6)    | 1448.24<br>(1078.97;1787.89)    | 220.23<br>(140.69;297.35)  |
| Iraq                                | 74.53<br>(61.12;95.48)          | 128.95<br>(90.47;187.96)        | 73.03<br>(35.91;114.31)   | 196.58<br>(129.76;296.79)       | 163.77<br>(90.53;267.18)   |
| Jordan                              | 14.27<br>(12.49;16)             | 23.88<br>(17.13;31.06)          | 67.39<br>(24.11;106.89)   | 29.45<br>(19.39;39.59)          | 106.37<br>(38.14;167.32)   |
| Kuwait                              | 4.84<br>(4.31;5.49)             | 5.07<br>(4.41;5.82)             | 4.74<br>(-12.74;25.64)    | 5.65<br>(4.81;6.66)             | 16.74<br>(-4.91;42.29)     |
| Lebanon                             | 88.76<br>(4.61;426.32)          | 130.4<br>(4.13;631.43)          | 46.92<br>(-50.45;310.14)  | 131.92<br>(4.11;596.29)         | 48.63<br>(-58.77;890.78)   |
| Libya                               | 70.13<br>(7.53;299.75)          | 122.86<br>(11.16;466.47)        | 75.19<br>(-17.68;392.06)  | 172.7<br>(13.5;562.18)          | 146.25<br>(-12.08;1307.96) |
| Morocco                             | 889.73<br>(27.01;4608.83)       | 627.98<br>(15.21;3930.67)       | -29.42<br>(-83.21;50.18)  | 714.44<br>(12.56;4503.98)       | -19.7<br>(-85.9;189.37)    |
| Palestine                           | 8.52<br>(7.73;9.26)             | 11.58<br>(9.66;13.71)           | 35.85<br>(21.14;51.83)    | 17.61<br>(13.97;22.42)          | 106.63<br>(70.61;160.78)   |
| Oman                                | 61.72<br>(35.22;82.69)          | 167.73<br>(87.2;247.73)         | 171.75<br>(22.57;271.49)  | 350.67<br>(185.67;560.14)       | 468.16<br>(164.43;981.76)  |
| Qatar                               | 6.47<br>(5.23;7.38)             | 6.19<br>(4.82;7.43)             | -4.2<br>(-16.04;9.48)     | 7.62<br>(5.91;9.58)             | 17.8<br>(-1.73;41.58)      |
| Saudi Arabia                        | 419.63<br>(363.84;513.4)        | 558.22<br>(412.25;721.93)       | 33.03<br>(3.27;68.21)     | 732.97<br>(497.94;1086.52)      | 74.67<br>(20.67;163.95)    |
| Sudan                               | 4628.5<br>(3565.73;5971.88)     | 5212.84<br>(3797.35;6998.14)    | 12.62<br>(-8.89;36.98)    | 5357.18<br>(2660.22;8672.96)    | 15.74<br>(-37.79;81.15)    |
| Syria                               | 21.96<br>(18.76;26.92)          | 10.77<br>(7.5;17.4)             | -50.96<br>(-62.41;-28.98) | 19.65<br>(12.83;32.85)          | -10.48<br>(-36.66;36.75)   |



|                                               |                                    |                                 |                            |                                 |                             |
|-----------------------------------------------|------------------------------------|---------------------------------|----------------------------|---------------------------------|-----------------------------|
| Tunisia                                       | 119.07<br>(6.24;599.9)             | 213.12<br>(7.25;862.86)         | 78.98<br>(-51.17;445.75)   | 306.87<br>(12.35;1091.2)        | 157.73<br>(-20.17;2157.57)  |
| Turkey                                        | 106.57<br>(90.68;124.98)           | 202.02<br>(156.71;247.28)       | 89.57<br>(48;129.77)       | 256.96<br>(188.85;345.58)       | 141.12<br>(81.21;219.3)     |
| United Arab Emirates                          | 106.88<br>(10.81;460.05)           | 248.35<br>(14.12;1141.37)       | 132.36<br>(-26.18;695.54)  | 516.24<br>(22.59;2281.88)       | 383.02<br>(5.06;2345.23)    |
| Yemen                                         | 264.99<br>(12.28;1238.03)          | 468.31<br>(7.49;2327.78)        | 76.73<br>(-68.85;602.56)   | 772.91<br>(12.7;3178.84)        | 191.68<br>(-57.02;3294.63)  |
| <b>South Asia</b>                             |                                    |                                 |                            |                                 |                             |
| Bangladesh                                    | 379.3<br>(3.69;1937.21)            | 673.57<br>(6.43;3343.53)        | 77.58<br>(-61.62;899.2)    | 841.97<br>(8.05;3979.09)        | 121.98<br>(-64.62;2506.01)  |
| Bhutan                                        | 45.13<br>(0.75;225.87)             | 93.42<br>(3.09;376.51)          | 107.02<br>(-7.34;1108.78)  | 126.59<br>(4.58;455.15)         | 180.53<br>(0.37;3522.34)    |
| India                                         | 132108.58<br>(125968.23;139057.07) | 35653.95<br>(29851.83;41591.05) | -73.01<br>(-77.15;-68.64)  | 31642.47<br>(21845.06;48219.55) | -76.05<br>(-83.39;-63.94)   |
| Nepal                                         | 3206.58<br>(34.32;16948.31)        | 2485.86<br>(10.31;13354.02)     | -22.48<br>(-96.58;51.37)   | 2842.62<br>(7.54;16556.76)      | -11.35<br>(-97.68;80.72)    |
| Pakistan                                      | 1819.14<br>(23.83;9670.32)         | 7006.48<br>(127.66;29968.47)    | 285.15<br>(22.28;3825.63)  | 11332.35<br>(247.67;41701.03)   | 522.95<br>(73.5;12410.29)   |
| <b>Southeast Asia, East Asia, and Oceania</b> |                                    |                                 |                            |                                 |                             |
| <b>East Asia</b>                              |                                    |                                 |                            |                                 |                             |
| China                                         | 19833.77<br>(19344.05;20455.45)    | 32673.47<br>(28616.16;38444.21) | 64.74<br>(43.58;95.06)     | 34126<br>(23910.17;44773.58)    | 72.06<br>(19.7;125.38)      |
| North Korea                                   | 477.8<br>(7.7;2989.05)             | 886.68<br>(8.78;5288.9)         | 85.58<br>(-65.03;396.23)   | 1029.3<br>(7.17;5821.79)        | 115.42<br>(-73.29;1755.87)  |
| Taiwan (Province of China)                    | 175.11<br>(165.51;185.29)          | 150.05<br>(112.91;205.72)       | -14.31<br>(-36.47;17.67)   | 80.45<br>(34.24;144.5)          | -54.06<br>(-80.34;-17.4)    |
| <b>Oceania</b>                                |                                    |                                 |                            |                                 |                             |
| American Samoa                                | 0.32<br>(0.27;0.4)                 | 0.4<br>(0.31;0.51)              | 25.04<br>(2.92;53.68)      | 0.69<br>(0.47;0.97)             | 111.7<br>(50.61;201.42)     |
| Federated States of Micronesia                | 12.62<br>(0.19;65.34)              | 49.32<br>(1.84;174.17)          | 290.79<br>(66.83;6795.74)  | 92.24<br>(2.83;337.73)          | 630.97<br>(142.63;21891.84) |
| Fiji                                          | 12.27<br>(9.77;15.42)              | 12.82<br>(8.73;21.01)           | 4.47<br>(-18.38;42.84)     | 16.82<br>(11.08;25.61)          | 37.07<br>(4.18;85.32)       |
| Guam                                          | 3.96<br>(3.33;4.8)                 | 4.94<br>(3.8;6.29)              | 24.7<br>(1.4;47.83)        | 7.3<br>(4.97;10.48)             | 84.19<br>(28.62;161.56)     |
| Kiribati                                      | 0.56<br>(0.48;0.68)                | 0.53<br>(0.43;0.67)             | -5.03<br>(-14.64;10.27)    | 0.7<br>(0.47;1.17)              | 25.43<br>(-10.69;103.05)    |
| Marshall Islands                              | 1.8<br>(0.03;12.13)                | 3.79<br>(0.17;18.88)            | 110.31<br>(-13.94;2920.32) | 7.33<br>(0.35;33.49)            | 306.02<br>(21.92;11857.98)  |
| Northern Mariana Islands                      | 0.49<br>(0.41;0.59)                | 0.63<br>(0.47;0.81)             | 26.93<br>(2.57;56.05)      | 1.43<br>(0.9;2.15)              | 190.53<br>(87.89;342.33)    |
| Papua New Guinea                              | 2450.82<br>(1067.96;5509.02)       | 1302.09<br>(487.84;4103.79)     | -46.87<br>(-71.92;-16.7)   | 1484.72<br>(367.5;5082.24)      | -39.42<br>(-78.92;10.57)    |
| Samoa                                         | 6.36<br>(0.12;42.55)               | 12.66<br>(0.55;59.24)           | 99.07<br>(-22.13;2825.68)  | 21.09<br>(0.86;101.98)          | 231.64<br>(-7.73;9388.74)   |
| Solomon Islands                               | 18.59<br>(0.35;123.76)             | 39.79<br>(1.78;208.53)          | 114.06<br>(-9.94;3598.32)  | 73.78<br>(3.09;347.12)          | 296.91<br>(17.65;13592.08)  |
| Tonga                                         | 1.12<br>(0.88;1.43)                | 1.56<br>(1.22)                  | 39.53<br>(14.06;72.53)     | 2.75<br>(1.87;3.88)             | 146.44<br>(73.43;254.31)    |
| Vanuatu                                       | 9.21<br>(0.18;55.3)                | 18.9<br>(0.95;88.43)            | 105.27<br>(-10.73;2657.98) | 35.5<br>(1.55;173.72)           | 285.44<br>(17.14;10401.83)  |
| <b>Southeast Asia</b>                         |                                    |                                 |                            |                                 |                             |
| Cambodia                                      | 3028.23<br>(2057.95;4101.98)       | 1036.19<br>(486.9;1753.19)      | -65.78<br>(-79.98;-47.65)  | 614.69<br>(142.78;1472.76)      | -79.7<br>(-94.14;-57.02)    |
| Indonesia                                     | 4088.61<br>(3775.54;4521.61)       | 6726.54<br>(5851.13;7917.85)    | 64.52<br>(49.05;89.23)     | 8949.7<br>(7670.32;12139.88)    | 118.89<br>(94.9;205.31)     |
| Laos                                          | 477.66<br>(2.41;3670.72)           | 556.85<br>(3.9;4706.72)         | 16.58<br>(-72.67;669.44)   | 717.57<br>(2.69;5620.34)        | 50.23<br>(-82.91;1630.87)   |
| Malaysia                                      | 2072.91<br>(1765.39;2377.55)       | 1298.77<br>(744.87;1869.73)     | -37.35<br>(-59.32;-12.45)  | 1528.1<br>(803.26;2352)         | -26.28<br>(-55.54;11.96)    |
| Maldives                                      | 0.54<br>(0.49;0.6)                 | 0.74<br>(0.64;0.84)             | 36.87<br>(17.85;60.67)     | 0.91<br>(0.79;1.05)             | 68.78<br>(43.38;99.7)       |
| Mauritius                                     | 69.2<br>(65.19;73.41)              | 87.14<br>(72.84;102.03)         | 25.92<br>(5.06;48.43)      | 100.89<br>(75.68;128.05)        | 45.79<br>(9.71;85.76)       |
| Myanmar                                       | 15513.05<br>(12886.16;18817.17)    | 4321.09<br>(3031.61;5793.64)    | -72.15<br>(-78.82;-63.49)  | 4026.19<br>(2375.84;5848.41)    | -74.05<br>(-84.03;-62.48)   |
| Philippines                                   | 4298.61<br>(4223.01;4372.08)       | 4847.1<br>(4279.91;5651.72)     | 12.76<br>(-0.93;31.74)     | 8647.68<br>(6134.25;12564.85)   | 101.17<br>(42.86;191.32)    |
| Sri Lanka                                     | 74.01<br>(63.65;87.34)             | 54.67<br>(30.8;84.81)           | -26.14<br>(-55.53;13.62)   | 84.64<br>(41.93;143.44)         | 14.37<br>(-41.57;92.75)     |
| Seychelles                                    | 5.15<br>(4.94;5.52)                | 5.88<br>(5.24;6.74)             | 14.13<br>(4.81;24.03)      | 6.2<br>(5.4;7.43)               | 20.46<br>(7.65;40.17)       |
| Thailand                                      | 16920.36<br>(13432.04;21890.47)    | 15403.95<br>(10403.95;24136.35) | -8.96<br>(-39.68;18.9)     | 12630.2<br>(6914.17;22639)      | -25.36<br>(-59.33;10.47)    |
| Timor-Leste                                   | 216.89<br>(4.93;1270.32)           | 229.2<br>(0.55;1316.87)         | 5.68<br>(-95.44;128.3)     | 272.94<br>(0;1506.96)           | 25.85<br>(-100;298.65)      |
| Vietnam                                       | 10127<br>(8797.79;12003.53)        | 10474.28<br>(8004.58;14463.24)  | 3.43<br>(-11.32;22.79)     | 10706.14<br>(7984.95;15197.33)  | 5.72<br>(-13.38;31.13)      |
| <b>Sub-Saharan Africa</b>                     |                                    |                                 |                            |                                 |                             |
| <b>Central sub-Saharan Africa</b>             |                                    |                                 |                            |                                 |                             |
| Angola                                        | 12971.63<br>(9770.16;16930.73)     | 15148.26<br>(10567.52;20446.23) | 16.78<br>(-6.07;40.49)     | 15796.87<br>(5302.74;27404.73)  | 21.78<br>(-53.96;97.58)     |

|                                    |                                    |                                   |                              |                                   |                              |
|------------------------------------|------------------------------------|-----------------------------------|------------------------------|-----------------------------------|------------------------------|
| Central African Republic           | 10548.72<br>(8695.9;12642.72)      | 4716.76<br>(3636.21;6244.11)      | -55.29<br>(-63.52;-43.75)    | 3820.82<br>(1796.96;7079.78)      | -63.78<br>(-82.58;-32.62)    |
| Congo (Brazzaville)                | 5618.37<br>(4531.7;6861.83)        | 5309.34<br>(4048.25;6752.54)      | -5.5<br>(-17.55;4.68)        | 5445.94<br>(3538.07;7613.83)      | -3.07<br>(-28.55;18.33)      |
| DR Congo                           | 42001.78<br>(34533.83;50396.39)    | 13539.61<br>(9287.5;18613.25)     | -67.76<br>(-75.6;-58.54)     | 11497.4<br>(4732.09;20322.97)     | -72.63<br>(-88.53;-56.39)    |
| Equatorial Guinea                  | 1639.21<br>(1253.66;2138.24)       | 1576.78<br>(891.63;2461.16)       | -3.81<br>(-38.67;39.58)      | 1350.7<br>(249.85;2992.31)        | -17.6<br>(-82.6;77.95)       |
| Gabon                              | 2333.85<br>(1783.28;3051.4)        | 494.35<br>(210.77;867.59)         | -78.82***<br>(-90.38;-66.71) | 318.02<br>(69.7;769.49)           | -86.37<br>(-96.77;-70.82)    |
| <b>Eastern sub-Saharan Africa</b>  |                                    |                                   |                              |                                   |                              |
| Burundi                            | 8821.18<br>(7850.09;9945.39)       | 2062.27<br>(1451.15;2909.91)      | -76.62***<br>(-82.99;-68.25) | 1797.43<br>(865.89;3164.6)        | -79.62<br>(-89.75;-64.51)    |
| Comoros                            | 1.17<br>(0.02;8.39)                | 2.59<br>(0.07;15.48)              | 121.45<br>(-46.33;10326.88)  | 6.17<br>(0.13;41.3)               | 426.48<br>(-6.4;51542.73)    |
| Djibouti                           | 967.9<br>(749.96;1256.44)          | 671.76<br>(446.94;975.26)         | -30.6<br>(-45.7;-15.76)      | 659.92<br>(272.46;1154.34)        | -31.82<br>(-69.2;7.41)       |
| Eritrea                            | 2820.88<br>(2337.79;3381.45)       | 1492.29<br>(1082.76;1997.1)       | -47.1<br>(-57.24;-35.79)     | 1313.57<br>(651.92;2149.51)       | -53.43<br>(-76.08;-25.19)    |
| Ethiopia                           | 49414.68<br>(43852.47;55575.28)    | 7484.62<br>(3927.29;11856.23)     | -84.85***<br>(-91.44;-76.99) | 5015.9<br>(1784.04;10007.73)      | -89.85***<br>(-96.12;-80.67) |
| Kenya                              | 78721.66<br>(74421.7;83426.91)     | 46376.49<br>(40006.99;53966.39)   | -41.09<br>(-47.85;-32.82)    | 42381.52<br>(32364.73;54653.73)   | -46.16<br>(-58.38;-31.14)    |
| Madagascar                         | 2825.61<br>(2264.83;3501.24)       | 3230.13<br>(1768.92;8112.34)      | 14.32<br>(-32.52;203.76)     | 7713.62<br>(1678.52;34620.14)     | 172.99<br>(-37.78;1187.32)   |
| Malawi                             | 60026.65<br>(51683.94;71264.73)    | 23763.48<br>(19526.01;28794.55)   | -60.41<br>(-66.19;-53.05)    | 16367.48<br>(10057.17;23545.17)   | -72.73<br>(-81.66;-62.62)    |
| Mozambique                         | 89990.75<br>(74176.39;110239.25)   | 53570.23<br>(36702.6;73889.16)    | -40.47<br>(-54.45;-27.66)    | 47322.45<br>(23377.46;76986.64)   | -47.41<br>(-71.42;-24.89)    |
| Rwanda                             | 6952.76<br>(5951.1;8260.49)        | 3226<br>(2517.95;4077.39)         | -53.6<br>(-61.58;-46.03)     | 2339.35<br>(1405.91;3428.69)      | -66.35<br>(-78.26;-54.31)    |
| Somalia                            | 3254.45<br>(1275.66;9110.74)       | 2225.93<br>(331.7;7692.32)        | -31.6<br>(-78.56;-7.32)      | 2632.87<br>(100.44;9919.79)       | -19.1<br>(-93.77;28.17)      |
| South Sudan                        | 6187.44<br>(2289.23;15862.05)      | 3820.75<br>(1088.57;12517.45)     | -38.25<br>(-67.9;-18.38)     | 4071.87<br>(82.7;15834.99)        | -34.19<br>(-97.78;5.89)      |
| Tanzania                           | 91291.33<br>(72450.12;112245.55)   | 26566.25<br>(17724.15;38167.17)   | -70.9<br>(-79.93;-58.32)     | 23117.07<br>(7720.98;49368.01)    | -74.68<br>(-90.91;-43.34)    |
| Uganda                             | 67453.37<br>(56794.76;80714.09)    | 27127.72<br>(21147.49;37683.1)    | -59.78<br>(-67.74;-44.7)     | 21526.34<br>(11567.59;46200.3)    | -68.09<br>(-81.99;-32.41)    |
| Zambia                             | 43419.7<br>(36440.72;53109.12)     | 10102.75<br>(5265.47;17140.14)    | -76.73***<br>(-87.32;-65.49) | 7191.88<br>(3430.48;14789.54)     | -83.44<br>(-91.62;-70.29)    |
| <b>Southern sub-Saharan Africa</b> |                                    |                                   |                              |                                   |                              |
| Botswana                           | 9667.53<br>(7899.53;12157)         | 3393.32<br>(1957.04;5175.81)      | -64.9<br>(-78.33;-51.87)     | 1916.2<br>(681.24;4050.79)        | -80.18<br>(-92.82;-61.48)    |
| Lesotho                            | 12118.12<br>(9978.01;15252.06)     | 5380.44<br>(4050.54;7007.08)      | -55.6<br>(-63.94;-48.59)     | 4282.37<br>(2893.17;5980.37)      | -64.66<br>(-75.18;-53.49)    |
| Namibia                            | 8148.77<br>(6653.24;10121.39)      | 3171.36<br>(1883.28;4735.1)       | -61.08<br>(-74.38;-49.33)    | 2326.97<br>(835.96;4306.82)       | -71.44<br>(-88.59;-54.28)    |
| South Africa                       | 293922.36<br>(264332.99;330383.16) | 88312.74<br>(62791.25;114544.86)  | -69.95<br>(-77.37;-62.84)    | 52735.24<br>(26265.27;85378.82)   | -82.06<br>(-90.88;-72.32)    |
| eSwatini                           | 8543.85<br>(6892.66;10751.97)      | 1403.69<br>(940.56;1895.37)       | -83.57***<br>(-88.25;-77.94) | 575.64<br>(247.54;1099.25)        | -93.26***<br>(-96.96;-86.72) |
| Zimbabwe                           | 67092.11<br>(53252.06;83154.01)    | 17071.48<br>(11660.85;23818.12)   | -74.56***<br>(-82.44;-63.94) | 15494.74<br>(5203.54;31262.08)    | -76.91<br>(-92.31;-52.05)    |
| <b>Western sub-Saharan Africa</b>  |                                    |                                   |                              |                                   |                              |
| Benin                              | 2712.5<br>(2209.95;3361.69)        | 1806.71<br>(1267.18;2493.97)      | -33.39<br>(-47.35;-20.09)    | 1654.73<br>(885.4;2603.62)        | -39<br>(-63.55;-17.17)       |
| Burkina Faso                       | 6146.42<br>(4903.1;7472.46)        | 2255.55<br>(1526.75;3184.93)      | -63.3<br>(-72.26;-53.33)     | 1639.97<br>(554.19;3064.03)       | -73.32<br>(-89.76;-53.75)    |
| Cameroon                           | 33180.22<br>(27123.71;40520.18)    | 21905<br>(16313.05;28763.77)      | -33.98<br>(-45.37;-23.4)     | 18369.74<br>(9437.63;29016.55)    | -44.64<br>(-69.13;-21.34)    |
| Cape Verde                         | 166.76<br>(120.11;234.55)          | 123.43<br>(76.88;190.88)          | -25.98<br>(-42.34;-8.82)     | 141.75<br>(73.49;230.31)          | -14.99<br>(-45.16;15.72)     |
| Chad                               | 7336.77<br>(5522.07;9886.09)       | 5802.05<br>(4145.59;7987.97)      | -20.92<br>(-37.36;-4.34)     | 5952.09<br>(2501.58;9724.67)      | -18.87<br>(-60.45;20.98)     |
| Cote d'Ivoire                      | 33451.95<br>(24462.06;43189.47)    | 19952.42<br>(12762.71;30209.57)   | -40.35<br>(-56.91;-15.56)    | 25532.28<br>(8743.7;46256.83)     | -23.67<br>(-71.37;34.26)     |
| The Gambia                         | 1109.14<br>(824.08;1487.14)        | 858.59<br>(557.09;1235.65)        | -22.59<br>(-40.11;-5.82)     | 824.31<br>(263.89;1470.76)        | -25.68<br>(-71.15;14.5)      |
| Ghana                              | 20982.77<br>(17201.41;25642.49)    | 13336.6<br>(10110.48;17617.26)    | -36.44<br>(-45.9;-27.39)     | 12860.17<br>(7165.02;19907.51)    | -38.71<br>(-63.87;-12.05)    |
| Guinea                             | 5036.82<br>(4041.03;6333.64)       | 2141.62<br>(1286.72;3203.64)      | -57.48<br>(-71.06;-45.55)    | 1988.53<br>(798.3;3435.94)        | -60.52<br>(-82.54;-39.58)    |
| Guinea-Bissau                      | 2006.71<br>(1477.28;2680.29)       | 1266.4<br>(796.12;1873.95)        | -36.89<br>(-51.38;-22.73)    | 1251.47<br>(541.77;2123.31)       | -37.64<br>(-69.4;-8.96)      |
| Liberia                            | 2772.26<br>(2253.74;3316.17)       | 1712.37<br>(1291.21;2248.4)       | -38.23<br>(-50.34;-23.93)    | 1779.02<br>(957.41;2906.11)       | -35.83<br>(-63.15;0.09)      |
| Mali                               | 5907.6<br>(4828.65;7319.49)        | 4919.43<br>(3467.24;6651.79)      | -16.73<br>(-33.98;-1.65)     | 4939.93<br>(2742.77;7510.91)      | -16.38<br>(-48.36;10.31)     |
| Mauritania                         | 20.06<br>(0.56;151.36)             | 23.78<br>(0.75;200.02)            | 18.57<br>(-56.99;761.1)      | 35.13<br>(0.88;277.7)             | 75.15<br>(-53.17;1455.08)    |
| Niger                              | 3991.63<br>(3401.89;4760.52)       | 1812.17<br>(1425.18;2262.03)      | -54.6<br>(-61.62;-47.29)     | 1647.81<br>(998.25;2457.06)       | -58.72<br>(-73.7;-43.3)      |
| Nigeria                            | 210794.59<br>(171252.54;256867.14) | 150944.81<br>(112848.96;192956.1) | -28.39<br>(-39.77;-19.76)    | 147417.36<br>(88878.48;211887.41) | -30.07<br>(-53.96;-11.02)    |
| Sao Tome and Principe              | 0.31<br>(0.18;0.53)                | 0.2<br>(0.08;0.37)                | -34.67<br>(-65;3.94)         | 0.27<br>(0.08;0.55)               | -12.73<br>(-66.67;78.26)     |

|              |                               |                              |                           |                              |                           |
|--------------|-------------------------------|------------------------------|---------------------------|------------------------------|---------------------------|
| Senegal      | 2785.84<br>(2266.3;3436.11)   | 1803.71<br>(1365.43;2424.43) | -35.25<br>(-45.15;-25.33) | 2023.39<br>(1319.94;2957.85) | -27.37<br>(-47.58;-3.88)  |
| Sierra Leone | 3246.43<br>(2446.17;4213.92)  | 2043.77<br>(1375.77;2871.05) | -37.05<br>(-54.79;-17.95) | 1860.26<br>(621.26;3716.91)  | -42.7<br>(-79.03;8.91)    |
| Togo         | 9226.31<br>(7501.72;11582.09) | 3173.5<br>(2154.62;4354.26)  | -65.6<br>(-73.56;-57.66)  | 2338.99<br>(921.33;4152.6)   | -74.65<br>(-89.35;-58.23) |

\*\*\*Meets Target

UI = Uncertainty Interval

Appendix Table 3: Forecast number of incident cases and percent change in incident cases between 2010-2020 and 2010-2030

|                                                         | 2010 (95% UI)                   |                                    | 2020 (95% UI)             |                                   | 2030 (95% UI)             |                |
|---------------------------------------------------------|---------------------------------|------------------------------------|---------------------------|-----------------------------------|---------------------------|----------------|
|                                                         | Number of cases                 |                                    | Number of cases           | Percent Change                    | Number of cases           | Percent Change |
| <b>Central Europe, Eastern Europe, and Central Asia</b> |                                 |                                    |                           |                                   |                           |                |
| <b>Central Asia</b>                                     |                                 |                                    |                           |                                   |                           |                |
| Armenia                                                 | 113.49<br>(82.51;155.71)        | 176.64<br>(128.56;259.74)          | 55.64<br>(12.25;134.63)   | 188.28<br>(142.78;268.53)         | 65.9<br>(20.45;148.78)    |                |
| Azerbaijan                                              | 173.68<br>(109.11;228.55)       | 353.64<br>(233.64;527.2)           | 103.61<br>(45.88;185.5)   | 339.56<br>(223.71;501.43)         | 95.51<br>(41.56;213.61)   |                |
| Georgia                                                 | 552.86<br>(369.63;838.69)       | 426.16<br>(277.47;710.14)          | -22.92<br>(-37.51;-5.25)  | 475.39<br>(311.5;793.05)          | -14.01<br>(-29.45;4.75)   |                |
| Kazakhstan                                              | 851.37<br>(719.84;1030.11)      | 2555.89<br>(1726.17;3309.45)       | 200.21<br>(111.51;273.49) | 2408.92<br>(1659.17;3051.95)      | 182.95<br>(101.13;248.84) |                |
| Kyrgyzstan                                              | 510.82<br>(351.63;743.61)       | 936.76<br>(596.86;1455.91)         | 83.38<br>(17.39;179.85)   | 1074.5<br>(700.17;1632.68)        | 110.35<br>(34.86;225.95)  |                |
| Mongolia                                                | 44<br>(15.71;91.43)             | 70.85<br>(17.56;156.16)            | 61.02<br>(-9.79;153.28)   | 97.59<br>(26.25;204.03)           | 121.79<br>(33.74;240.89)  |                |
| Tajikistan                                              | 271.05<br>(195.07;332.97)       | 674.77<br>(364.81;952.82)          | 148.95<br>(71.69;242.25)  | 829.2<br>(492.18;1191.42)         | 205.92<br>(115.11;327.53) |                |
| Turkmenistan                                            | 108.73<br>(92.44;139.36)        | 177.19<br>(135.26;259.74)          | 62.97<br>(35.2;103.63)    | 259.56<br>(197.91;385.65)         | 138.73<br>(97.66;199.54)  |                |
| Uzbekistan                                              | 796.65<br>(113.59;1302.66)      | 2398.88<br>(734.08;4032.67)        | 201.12<br>(27.6;2405)     | 2740.39<br>(1022.03;4485.46)      | 243.99<br>(67.85;2698.03) |                |
| <b>Central Europe</b>                                   |                                 |                                    |                           |                                   |                           |                |
| Albania                                                 | 2.4<br>(1.94;3.19)              | 2.88<br>(2.23;4.01)                | 20.15<br>(8.01;35.08)     | 2.68<br>(2.15;3.63)               | 11.6<br>(-2.76;27.99)     |                |
| Bosnia and Herzegovina                                  | 3.25<br>(2.64;4.07)             | 3.56<br>(2.62;4.69)                | 9.55<br>(-5.28;24.4)      | 3.97<br>(3.01;4.99)               | 22.06<br>(6.92;37.72)     |                |
| Bulgaria                                                | 98.53<br>(88.4;112.53)          | 125.61<br>(95.99;158.81)           | 27.48<br>(-4.29;62.52)    | 125.13<br>(96.78;182.28)          | 26.99<br>(-4.99;91.58)    |                |
| Croatia                                                 | 45.91<br>(32.69;62.05)          | 46.08<br>(26.43;62.32)             | 0.37<br>(-35.41;45.18)    | 44.79<br>(27.94;60.06)            | -2.43<br>(-29.92;38.7)    |                |
| Czech Republic                                          | 109.4<br>(72.54;155.57)         | 111.87<br>(52.34;174.38)           | 2.25<br>(-37.93;21.32)    | 111.26<br>(59.97;166.03)          | 1.7<br>(-25.2;17.89)      |                |
| Hungary                                                 | 89.42<br>(68.77;116.9)          | 140.05<br>(94.93;211.97)           | 56.62<br>(29.51;94.56)    | 167.72<br>(113.62;256.51)         | 87.57<br>(56.55;134.19)   |                |
| Macedonia                                               | 8.31<br>(6.19;10.16)            | 9.41<br>(7.14;12.06)               | 13.33<br>(-3.76;29.43)    | 9.22<br>(6.87;11.59)              | 11<br>(-0.61;23.73)       |                |
| Montenegro                                              | 5.87<br>(4.49;7.16)             | 6.56<br>(5.03;8.38)                | 11.69<br>(-10.86;27.96)   | 6.37<br>(4.91;8.12)               | 8.47<br>(-12.24;23.12)    |                |
| Poland                                                  | 681.86<br>(401.99;1151.95)      | 674.35<br>(348.44;1179.13)         | -1.1<br>(-28.22;14.14)    | 641.19<br>(389.25;1067.54)        | -5.96<br>(-17.55;13.75)   |                |
| Romania                                                 | 1199.06<br>(967.29;1432.68)     | 941.63<br>(704.03;1167.66)         | -21.47<br>(-35.05;-3.86)  | 1001.52<br>(798.12;1205.34)       | -16.47<br>(-27.68;-2.22)  |                |
| Serbia                                                  | 173.83<br>(123.61;251.5)        | 140.99<br>(91.71;227.43)           | -18.89<br>(-36.29;1.87)   | 171.91<br>(110.6;276.78)          | -1.1<br>(-23.49;25.4)     |                |
| Slovakia                                                | 24.91<br>(18.9;33.02)           | 23.28<br>(16.98;32.28)             | -6.55<br>(-16.79;9.79)    | 22.45<br>(16.92;29.89)            | -9.89<br>(-17.35;5.64)    |                |
| Slovenia                                                | 11.6<br>(8.11;16.88)            | 12.39<br>(8.62;18.5)               | 6.79<br>(-8.64;24.48)     | 12.97<br>(9.63;19.51)             | 11.79<br>(-4.54;43.74)    |                |
| <b>Eastern Europe</b>                                   |                                 |                                    |                           |                                   |                           |                |
| Belarus                                                 | 1024.89<br>(874.35;1259.12)     | 2505.67<br>(1695.72;3519.11)       | 144.48<br>(69.22;233.9)   | 2114.07<br>(1452.22;2894.38)      | 106.27<br>(45.62;173.97)  |                |
| Estonia                                                 | 275.16<br>(229.92;329.47)       | 208.19<br>(158.36;272.5)           | -24.34<br>(-44.27;10.18)  | 207.36<br>(174.69;250.13)         | -24.64<br>(-38.86;-1.83)  |                |
| Latvia                                                  | 278.68<br>(247.01;331.43)       | 436.09<br>(328.01;508.82)          | 56.49<br>(5.47;85.71)     | 351.66<br>(261.59;404.65)         | 26.19<br>(-16.49;51.04)   |                |
| Lithuania                                               | 162.1<br>(120.25;203.38)        | 149.18<br>(45.76;217.73)           | -7.97<br>(-66.05;11.83)   | 138.28<br>(51.17;193.19)          | -14.7<br>(-62.41;2.83)    |                |
| Moldova                                                 | 624.31<br>(440.25;880.39)       | 786.49<br>(570.85;1103.18)         | 25.98<br>(5.39;49.75)     | 765.08<br>(568.94;1050.1)         | 22.55<br>(-0.08;49.87)    |                |
| Russian Federation                                      | 61827.71<br>(48996.61;77237.63) | 141267.28<br>(115071.78;173465.44) | 128.49<br>(76.19;194.9)   | 118615.82<br>(98296.54;140999.41) | 91.85<br>(47.98;158.47)   |                |
| Ukraine                                                 | 8145.07<br>(5448.83;9714.34)    | 27454.77<br>(18396.96;34764.1)     | 237.07<br>(154.06;375.66) | 22940.9<br>(14730.74;28842.96)    | 181.65<br>(123.85;281.99) |                |
| <b>High-income</b>                                      |                                 |                                    |                           |                                   |                           |                |
| <b>Australasia</b>                                      |                                 |                                    |                           |                                   |                           |                |
| Australia                                               | 1025<br>(635.46;1554.31)        | 1508.62<br>(887.93;2197.94)        | 47.18<br>(30.01;75)       | 1810.93<br>(1102.65;2618.36)      | 76.68<br>(54.95;110.03)   |                |
| New Zealand                                             | 190.59<br>(101.36;295.29)       | 208.91<br>(101.96;332.05)          | 9.61<br>(-25.92;49.52)    | 276.32<br>(135.98;431.21)         | 44.98<br>(0.66;97.16)     |                |
| <b>High-income Asia-Pacific</b>                         |                                 |                                    |                           |                                   |                           |                |
| Brunei                                                  | 24.59<br>(14.49;38.94)          | 36.33<br>(20.5;58.13)              | 47.73<br>(19.77;68.49)    | 38.24<br>(22.74;60.03)            | 55.51<br>(28.03;80)       |                |

|                                    |                                |                                 |                           |                                  |                          |
|------------------------------------|--------------------------------|---------------------------------|---------------------------|----------------------------------|--------------------------|
| Japan                              | 1527.03<br>(1059.1;2130.27)    | 1391.76<br>(745.78;2022.49)     | -8.86<br>(-35.64;4.19)    | 1328.38<br>(778.78;1929.35)      | -13.01<br>(-32.64;-2.21) |
| South Korea                        | 1397.69<br>(678.13;2610.27)    | 1425.31<br>(336.18;2773.11)     | 1.98<br>(-73.59;78.21)    | 1763.43<br>(413.9;3374.91)       | 26.17<br>(-67.04;120.85) |
| Singapore                          | 144.09<br>(74.63;237.03)       | 198.44<br>(106.19;308.08)       | 37.71<br>(16.28;75.05)    | 277.61<br>(153.84;428.95)        | 92.66<br>(59.25;154)     |
| <b>High-income North America</b>   |                                |                                 |                           |                                  |                          |
| Canada                             | 2096<br>(1174.39;3210)         | 4028.32<br>(1725.36;6624.51)    | 92.19<br>(23.62;144.52)   | 5317.77<br>(2293.94;8645.27)     | 153.71<br>(64.25;216.07) |
| Greenland                          | 7.58<br>(4.39;12.23)           | 11.63<br>(4.94;19.01)           | 53.33<br>(-6.33;80.63)    | 14.01<br>(6.28;22.56)            | 84.73<br>(19.48;122.2)   |
| USA                                | 39513<br>(24086.87;60204.76)   | 57180.66<br>(21291.95;91742.03) | 44.71<br>(-22.9;73.1)     | 73931.07<br>(28330.51;119130.85) | 87.11<br>(2.54;122.59)   |
| <b>Southern Latin America</b>      |                                |                                 |                           |                                  |                          |
| Argentina                          | 10712.74<br>(5002.14;18382.79) | 12821.53<br>(6612.22;21877.64)  | 19.68<br>(6.05;36.57)     | 13501.18<br>(7439.69;22629.67)   | 26.03<br>(11.21;50.66)   |
| Chile                              | 2963.62<br>(1632.35;4925.14)   | 4107.26<br>(2167.43;6742.56)    | 38.59<br>(27.62;49.54)    | 4145.51<br>(2275.14;6627.52)     | 39.88<br>(31.7;49.83)    |
| Uruguay                            | 388.47<br>(280.05;543.68)      | 869.88<br>(669.81;1126.82)      | 123.92<br>(71.24;204.79)  | 921.13<br>(700;1299.05)          | 137.11<br>(72.82;245.43) |
| <b>Western Europe</b>              |                                |                                 |                           |                                  |                          |
| Andorra                            | 4.64<br>(0.26;20.9)            | 4.76<br>(0.27;22.12)            | 2.73<br>(-31.62;59.46)    | 4.69<br>(0.28;21.96)             | 1.21<br>(-30.31;61.56)   |
| Austria                            | 650.8<br>(333.84;1040.52)      | 739.69<br>(404.68;1130.52)      | 13.66<br>(-9.06;65.49)    | 778.45<br>(422.66;1294.12)       | 19.61<br>(-5.48;83.81)   |
| Belgium                            | 997<br>(457.82;1742.86)        | 1210.57<br>(486.89;1942.97)     | 21.42<br>(-12.87;74.83)   | 1329.63<br>(589.41;2128.76)      | 33.36<br>(-3.29;93.52)   |
| Cyprus                             | 80<br>(45.35;126.25)           | 116.82<br>(83.36;165.79)        | 46.03<br>(18.36;97)       | 124.11<br>(90.09;174.39)         | 55.14<br>(26.71;111.81)  |
| Denmark                            | 386.37<br>(243.09;565.64)      | 433.62<br>(221.9;668.75)        | 12.23<br>(-31.71;49.89)   | 474.06<br>(251.88;716.19)        | 22.69<br>(-23.47;64.07)  |
| Finland                            | 174<br>(81.05;300.62)          | 160.88<br>(45.36;276.74)        | -7.54<br>(-59.62;55.18)   | 164.35<br>(52.84;273.35)         | -5.55<br>(-52.61;54.75)  |
| France                             | 3921<br>(2142.49;6420.98)      | 5536.48<br>(2803.48;9167.1)     | 41.2<br>(16.5;73.36)      | 6571.04<br>(3378.8;11101.29)     | 67.59<br>(35.38;105.37)  |
| Germany                            | 5915.97<br>(3040.44;9154.08)   | 7168.96<br>(4234.6;10267.86)    | 21.18<br>(-9.81;87.61)    | 8503.65<br>(5026.21;11900.9)     | 43.74<br>(9.36;117.96)   |
| Greece                             | 691<br>(497.12;1065.77)        | 513.76<br>(330.16;842.92)       | -25.65<br>(-36.65;-10.77) | 501<br>(331.39;788.76)           | -27.5<br>(-36.49;-16.37) |
| Iceland                            | 12<br>(6.7;17.83)              | 20.56<br>(9.87;30.79)           | 71.34<br>(7.91;139.61)    | 21<br>(11.04;31.39)              | 75.02<br>(28.56;146.96)  |
| Ireland                            | 486<br>(229.81;774.48)         | 548.69<br>(215.13;851.89)       | 12.9<br>(-24.4;44.04)     | 622.92<br>(278.27;953.13)        | 28.17<br>(-4.31;69.44)   |
| Israel                             | 598.97<br>(313.78;968.61)      | 734.37<br>(396.36;1038.34)      | 22.61<br>(-9.85;86.46)    | 889.53<br>(502.3;1273.38)        | 48.51<br>(15.74;119.15)  |
| Italy                              | 5523.25<br>(3083.72;8186.98)   | 7893.24<br>(4724.57;11974.53)   | 42.91<br>(9.25;102.73)    | 9151.79<br>(5758.04;13564.01)    | 65.7<br>(26.71;137.24)   |
| Luxembourg                         | 57<br>(27.96;90.84)            | 99.73<br>(45.07;146.62)         | 74.96<br>(22.65;144.05)   | 109.72<br>(53.86;160.53)         | 92.5<br>(39.64;165.46)   |
| Malta                              | 67.64<br>(38.13;103.86)        | 97.21<br>(52.37;152.74)         | 43.71<br>(31.57;56.51)    | 89.38<br>(48.95;138.62)          | 32.13<br>(22.25;42.59)   |
| Netherlands                        | 947.11<br>(606.65;1266.42)     | 583.64<br>(292.45;880.96)       | -38.38<br>(-65.9;-0.85)   | 688.56<br>(346.4;1036.35)        | -27.3<br>(-61.21;17.65)  |
| Norway                             | 226.95<br>(119.56;356.83)      | 301.36<br>(163.98;451.38)       | 32.79<br>(5.31;76.06)     | 335.61<br>(182.07;500.99)        | 47.88<br>(17.24;95.9)    |
| Portugal                           | 5927<br>(3216.4;8508.34)       | 6762.85<br>(3460.81;9899.57)    | 14.1<br>(-10.78;45.24)    | 5151.88<br>(2584.39;7483.35)     | -13.08<br>(-32.41;14.24) |
| Spain                              | 3694.66<br>(1845.46;5966.82)   | 6738.49<br>(2884.48;12444.53)   | 82.38<br>(48.88;119.08)   | 7036.14<br>(3077.14;12741.8)     | 90.44<br>(52.13;130.62)  |
| Sweden                             | 447<br>(249.04;681.65)         | 660.99<br>(313.15;1013.58)      | 47.87<br>(4.34;76.31)     | 662.59<br>(333.31;1002.99)       | 48.23<br>(8.55;73.15)    |
| Switzerland                        | 588.35<br>(294.18;866.98)      | 733.29<br>(253.63;1126.57)      | 24.63<br>(-15.46;47.47)   | 936.43<br>(312.18;1416.55)       | 59.16<br>(8.07;91.74)    |
| United Kingdom                     | 6088<br>(3450.51;8884.71)      | 7316.94<br>(4307.7;10374.73)    | 20.19<br>(4.66;37.61)     | 7891.02<br>(4774.19;11149.16)    | 29.62<br>(13.89;49.37)   |
| <b>Latin America and Caribbean</b> |                                |                                 |                           |                                  |                          |
| <b>Andean Latin America</b>        |                                |                                 |                           |                                  |                          |
| Bolivia                            | 2263.76<br>(261.96;8692.58)    | 2847.05<br>(328.51;11144.45)    | 25.77<br>(-21.28;76.69)   | 3585.21<br>(476.53;13165.67)     | 58.37<br>(11.94;134.79)  |
| Ecuador                            | 2493.67<br>(1997.24;3344.43)   | 3349.02<br>(2709.91;4275.23)    | 34.3<br>(16.45;51.91)     | 3779.36<br>(3190.54;4660.74)     | 51.56<br>(28.65;75)      |
| Peru                               | 6342.4<br>(5028.63;8378.15)    | 7504.36<br>(5235.31;11576.45)   | 18.32<br>(-5.52;52.81)    | 8778.81<br>(6541.15;12493.24)    | 38.41<br>(19.26;67.59)   |
| <b>Caribbean</b>                   |                                |                                 |                           |                                  |                          |
| Antigua and Barbuda                | 8.4<br>(7.51;10.4)             | 9.98<br>(8.35;13.08)            | 18.8<br>(2.85;40.92)      | 13.87<br>(11.55;18.15)           | 64.97<br>(41.86;96.78)   |
| The Bahamas                        | 236.72<br>(216.79;267.05)      | 363.86<br>(306.14;469.52)       | 53.71<br>(27.65;100.72)   | 333.73<br>(270.55;438.36)        | 40.98<br>(11.14;90.8)    |
| Barbados                           | 64.97<br>(54.96;84.57)         | 67.95<br>(47.89;93.46)          | 4.59<br>(-23.07;36.83)    | 56.03<br>(39.66;74.82)           | -13.76<br>(-35.39;12.34) |
| Belize                             | 151.61<br>(136.6;172.4)        | 273.53<br>(228.4;337.27)        | 80.41<br>(57.66;110.33)   | 286.06<br>(248.1;342.69)         | 88.67<br>(66.22;113.87)  |
| Bermuda                            | 6.58<br>(5.78;7.26)            | 6.61<br>(5.84;7.57)             | 0.58<br>(-12;18.68)       | 10<br>(8.78;11.62)               | 52<br>(31.34;83.98)      |

|                                     |                                 |                                 |                            |                                  |                           |
|-------------------------------------|---------------------------------|---------------------------------|----------------------------|----------------------------------|---------------------------|
| Cuba                                | 2252.53<br>(1415.25;3200.19)    | 2820.47<br>(1569.55;4377.65)    | 25.21<br>(3.68;49.51)      | 2680.86<br>(1495.28;4178.78)     | 19.02<br>(-0.32;44.09)    |
| Dominica                            | 7.06<br>(5.89;9.72)             | 7.23<br>(5.72;10.31)            | 2.47<br>(-9.96;19.69)      | 9.91<br>(7.87;13.75)             | 40.4<br>(22.71;63.89)     |
| Dominican Republic                  | 4469.58<br>(2861.94;6256.74)    | 4212.9<br>(2641.88;6341.49)     | -5.74<br>(-25.94;24.55)    | 4002.33<br>(2462.15;6055.52)     | -10.45<br>(-30.2;17.61)   |
| Grenada                             | 7.98<br>(7.12;9.58)             | 7.25<br>(6.18;9.16)             | -9.1<br>(-21.1;6.76)       | 10.78<br>(9.19;13.37)            | 35.1<br>(16.79;59.13)     |
| Guyana                              | 811.03<br>(547.04;1034.93)      | 634.78<br>(458.09;798.33)       | -21.73<br>(-33.83;-4.61)   | 655.27<br>(422.28;871.73)        | -19.21<br>(-33.5;-1.59)   |
| Haiti                               | 11026.56<br>(8897.46;13756.17)  | 9247.65<br>(6862.17;12115.12)   | -16.13<br>(-30.21;0.96)    | 9248.96<br>(6674.68;12383.75)    | -16.12<br>(-31.44;0.99)   |
| Jamaica                             | 1152.7<br>(977;1432.04)         | 1275.36<br>(969.07;1680.21)     | 10.64<br>(-8.49;31.47)     | 1180.97<br>(925.82;1498.16)      | 2.45<br>(-14.69;24.02)    |
| Puerto Rico                         | 160.27<br>(135.12;183.92)       | 212.03<br>(178.27;247.36)       | 32.29<br>(15;53.4)         | 275.58<br>(232.34;322.94)        | 71.95<br>(49.46;101.86)   |
| Saint Lucia                         | 8.46<br>(7.41;11.09)            | 9.77<br>(8.12;13.15)            | 15.55<br>(0.24;33.48)      | 13.34<br>(11.06;17.98)           | 57.82<br>(35.34;83.26)    |
| Saint Vincent and the Grenadines    | 22.8<br>(20.02;27.73)           | 22.89<br>(19.2;29.81)           | 0.41<br>(-13.49;19.25)     | 30.4<br>(25.36;39.72)            | 33.32<br>(14.01;58.66)    |
| Suriname                            | 203.59<br>(182.24;237.1)        | 217.53<br>(175.61;290.27)       | 6.85<br>(-12.8;33.97)      | 199.65<br>(159.19;254.83)        | -1.93<br>(-19.93;22.02)   |
| Trinidad and Tobago                 | 529.87<br>(473.84;629.72)       | 409.76<br>(345.57;501.76)       | -22.67<br>(-33.1;-10.42)   | 346.99<br>(282.18;425.07)        | -34.51<br>(-45.9;-22.22)  |
| Virgin Islands                      | 12.75<br>(10.34;17.11)          | 16<br>(10.89;24.81)             | 25.48<br>(0.94;53.37)      | 19.51<br>(13.67;29.71)           | 53.03<br>(24.39;91.75)    |
| <b>Central Latin America</b>        |                                 |                                 |                            |                                  |                           |
| Colombia                            | 5887.09<br>(4956.83;7386)       | 9959.03<br>(7459.92;13317.47)   | 69.17<br>(45.72;99.95)     | 10976.35<br>(8394.65;14526.39)   | 86.45<br>(58.37;125.71)   |
| Costa Rica                          | 412.93<br>(340.47;561.65)       | 413.6<br>(310.02;563.29)        | 0.16<br>(-13.61;16.8)      | 463.28<br>(387.82;591.04)        | 12.19<br>(-0.7;31.33)     |
| El Salvador                         | 1934.24<br>(1243.9;2453.07)     | 1368.53<br>(847.96;1846.69)     | -29.25<br>(-45.67;-8.54)   | 1526.76<br>(959.75;2013.45)      | -21.07<br>(-37.3;-3.46)   |
| Guatemala                           | 1311.78<br>(756;2592.44)        | 2781.23<br>(1356.3;6026.18)     | 112.02<br>(35.99;219.77)   | 3909.21<br>(1974.41;7793.03)     | 198.01<br>(97.07;343.67)  |
| Honduras                            | 498.16<br>(407.87;620.78)       | 611.31<br>(422.4;835.82)        | 22.71<br>(-14.57;68.11)    | 770.52<br>(555.39;1001.37)       | 54.67<br>(11.56;98.77)    |
| Mexico                              | 15296.33<br>(12046.47;23687.19) | 21821.41<br>(16256.39;28849.67) | 42.66<br>(-6.69;70.41)     | 26813.32<br>(20223.97;34485.54)  | 75.29<br>(16.09;106.42)   |
| Nicaragua                           | 1404.98<br>(1096.39;1720.97)    | 2118.35<br>(1428.04;2890.07)    | 50.77<br>(17.45;95.51)     | 2400.1<br>(1635.24;3304.34)      | 70.83<br>(32.68;123.52)   |
| Panama                              | 1158.15<br>(935.51;1538.29)     | 1881.37<br>(1459.4;2534.73)     | 62.45<br>(46;80.65)        | 1691.21<br>(1325.4;2296.4)       | 46.03<br>(30.58;64.46)    |
| Venezuela                           | 5657.73<br>(4840.04;7291.02)    | 8372.24<br>(6644.58;10357.87)   | 47.98<br>(17.61;79.14)     | 9563.36<br>(7685.36;11582.49)    | 69.03<br>(31.29;106.27)   |
| <b>Tropical Latin America</b>       |                                 |                                 |                            |                                  |                           |
| Brazil                              | 62884.89<br>(48144.5;74554.55)  | 89225.18<br>(65486.2;106959.24) | 41.89<br>(24.24;53.34)     | 96956.73<br>(69943.28;116647.03) | 54.18<br>(38.97;67.32)    |
| Paraguay                            | 1638.4<br>(1116.29;2092.46)     | 1842.06<br>(1221.57;2476.36)    | 12.43<br>(-3.81;31.33)     | 2157.2<br>(1420.89;2812.76)      | 31.67<br>(17.96;47.98)    |
| <b>North Africa and Middle East</b> |                                 |                                 |                            |                                  |                           |
| Afghanistan                         | 322.06<br>(26.46;1251.17)       | 1051.66<br>(51.25;4338.87)      | 226.54<br>(32.13;568.59)   | 1301.33<br>(76.62;5447.9)        | 304.07<br>(100.07;717.45) |
| Algeria                             | 1073.47<br>(109.92;3783.83)     | 1050.31<br>(24.06;4049.01)      | -2.16<br>(-96.23;135.2)    | 1375.75<br>(0.82;5063.44)        | 28.16<br>(-99.89;217.75)  |
| Bahrain                             | 19.87<br>(17.9;23.03)           | 26.48<br>(22.41;31.72)          | 33.28<br>(15.26;52.98)     | 51.83<br>(43.29;63)              | 160.82<br>(123.6;203.47)  |
| Egypt                               | 312.4<br>(257.02;374.11)        | 613.12<br>(440.32;786.72)       | 96.26<br>(46.94;153.7)     | 779.16<br>(577.59;1005.64)       | 149.41<br>(86.32;222.72)  |
| Iran                                | 1478.67<br>(1171.21;1815.78)    | 3333.82<br>(2208.97;4445.28)    | 125.46<br>(55.63;193.62)   | 3942.44<br>(2609.36;5512.15)     | 166.62<br>(81.43;251.43)  |
| Iraq                                | 123.74<br>(67.31;212.29)        | 252.34<br>(131.05;485.26)       | 103.92<br>(44.34;235.94)   | 345.05<br>(184.39;647.86)        | 178.85<br>(102.31;370.02) |
| Jordan                              | 40.02<br>(31.23;54.62)          | 61.89<br>(42.8;78.73)           | 54.67<br>(0.13;118.6)      | 75.76<br>(52.6;95.29)            | 89.32<br>(26.12;163.73)   |
| Kuwait                              | 10.73<br>(8.62;12.59)           | 19.68<br>(15.54;25.16)          | 83.36<br>(57.95;119.65)    | 30.42<br>(24.02;38.05)           | 183.44<br>(142.97;235.17) |
| Lebanon                             | 128.71<br>(11.24;539.58)        | 275.23<br>(15.35;1190.1)        | 113.84<br>(2.06;354.91)    | 244.82<br>(13.77;1138.45)        | 90.21<br>(-1.21;390.88)   |
| Libya                               | 112.33<br>(9.56;465.02)         | 214.23<br>(12.95;946.04)        | 90.71<br>(-7.59;330.35)    | 259.15<br>(17.33;1092.18)        | 130.7<br>(34.76;468.38)   |
| Morocco                             | 1364.39<br>(95.3;5722.65)       | 1286.15<br>(72.93;5512.66)      | -5.73<br>(-51.36;114.92)   | 1566.2<br>(91.73;6695.47)        | 14.79<br>(-38.41;157.35)  |
| Palestine                           | 14.03<br>(9.99;20.61)           | 22.06<br>(14.36;33.85)          | 57.24<br>(35.97;82.17)     | 31.09<br>(21.07;48.49)           | 121.64<br>(93.62;158.85)  |
| Oman                                | 174.87<br>(7.95;306.85)         | 712.74<br>(332.63;1286.79)      | 307.58<br>(144.92;8758.68) | 858.65<br>(401.35;1496.25)       | 391.01<br>(204;11088.36)  |
| Qatar                               | 6.7<br>(5.86;8.11)              | 12.93<br>(10.27;16.58)          | 92.88<br>(64.32;133.6)     | 22.23<br>(17.07;29)              | 231.51<br>(173.83;311.79) |
| Saudi Arabia                        | 513.79<br>(199.45;801.37)       | 798.12<br>(473.81;1495.44)      | 55.34<br>(14.33;200.72)    | 1145.34<br>(727.88;1919.16)      | 122.92<br>(69.53;296.54)  |
| Sudan                               | 9647.11<br>(7162.61;12706.27)   | 8597.95<br>(4670.08;15463.12)   | -10.88<br>(-46.53;46.02)   | 12216.42<br>(6488.16;20319.41)   | 26.63<br>(-24.96;86.47)   |
| Syria                               | 59.18<br>(43.89;87.16)          | 49.18<br>(33.07;74.86)          | -16.91<br>(-32.48;1.04)    | 75.73<br>(53.01;114.92)          | 27.96<br>(7.49;51.66)     |

|                                               |                                  |                                  |                           |                                   |                           |
|-----------------------------------------------|----------------------------------|----------------------------------|---------------------------|-----------------------------------|---------------------------|
| Tunisia                                       | 323.79<br>(35.78;1050.02)        | 458.94<br>(51.78;1708.48)        | 41.74<br>(-24.87;145.05)  | 506.87<br>(59.83;1826.6)          | 56.54<br>(-1.99;176.64)   |
| Turkey                                        | 392.53<br>(315.93;525.74)        | 505.02<br>(356.75;745.79)        | 28.66<br>(7.99;47.86)     | 521.65<br>(392.94;753.99)         | 32.89<br>(17.35;50.95)    |
| United Arab Emirates                          | 179.97<br>(10.41;958.7)          | 280.7<br>(13.19;1554.78)         | 55.97<br>(-19.08;327.14)  | 549.35<br>(26.71;3036.12)         | 205.24<br>(58.96;843.31)  |
| Yemen                                         | 545.62<br>(39.01;2462.8)         | 1219.33<br>(53.74;5466.52)       | 123.48<br>(-16.25;356.97) | 1656.2<br>(86.64;7359.81)         | 203.55<br>(34.64;552.73)  |
| <b>South Asia</b>                             |                                  |                                  |                           |                                   |                           |
| Bangladesh                                    | 1152.29<br>(30.5;4864.12)        | 1077.2<br>(25.34;4586.19)        | -6.52<br>(-48.25;85.29)   | 1282.34<br>(33.09;5501.78)        | 11.29<br>(-29.6;93.97)    |
| Bhutan                                        | 102.15<br>(2.72;423.2)           | 150.59<br>(4.03;666.51)          | 47.42<br>(-14.72;188.94)  | 178.6<br>(5.66;739.49)            | 74.83<br>(21.53;244.41)   |
| India                                         | 98676.87<br>(69514.03;135948.95) | 108884.4<br>(68211.14;162430.12) | 10.34<br>(-22.63;53.61)   | 139460.66<br>(86709.36;204484.74) | 41.33<br>(-0.67;94.27)    |
| Nepal                                         | 3992.99<br>(109.17;17279.43)     | 2555.25<br>(65.06;11359.95)      | -36.01<br>(-66.57;30.36)  | 3535.95<br>(92.67;15522.98)       | -11.45<br>(-53.11;66.73)  |
| Pakistan                                      | 8379.76<br>(251.14;33265.19)     | 16320.34<br>(496.93;68397.41)    | 94.76<br>(8.93;309.66)    | 19750.21<br>(661;79870.13)        | 135.69<br>(55.17;399.46)  |
| <b>Southeast Asia, East Asia, and Oceania</b> |                                  |                                  |                           |                                   |                           |
| <b>East Asia</b>                              |                                  |                                  |                           |                                   |                           |
| China                                         | 55710.48<br>(38322.9;89620.9)    | 36680.43<br>(15280.46;62276.58)  | -34.16<br>(-63.89;-22.78) | 43842.62<br>(20542.82;70824.76)   | -21.3<br>(-51.8;-11.36)   |
| North Korea                                   | 1172.65<br>(14.8;6047.75)        | 1257.31<br>(10.03;7960.25)       | 7.22<br>(-68.08;104.51)   | 1459.56<br>(14.51;8651.35)        | 24.47<br>(-55.39;117.27)  |
| Taiwan (Province of China)                    | 395.23<br>(281.21;616.77)        | 215.69<br>(107.45;384.38)        | -45.43<br>(-68.02;-33.06) | 193.29<br>(94.92;323.66)          | -51.09<br>(-71.48;-40.68) |
| <b>Oceania</b>                                |                                  |                                  |                           |                                   |                           |
| American Samoa                                | 0.46<br>(0.29;0.73)              | 0.79<br>(0.45;1.34)              | 71.2<br>(27.5;131.68)     | 1.33<br>(0.73;2.27)               | 186.3<br>(102.91;278.8)   |
| Federated States of Micronesia                | 38.24<br>(0.45;209.26)           | 91.23<br>(0.79;535.26)           | 138.55<br>(-8.26;419.99)  | 131.42<br>(1.1;821.96)            | 243.65<br>(13.72;719.3)   |
| Fiji                                          | 31.63<br>(25.72;40.48)           | 54.17<br>(41.64;72.7)            | 71.23<br>(49.97;96.78)    | 58.19<br>(43.93;77.58)            | 83.94<br>(54.23;138.32)   |
| Guam                                          | 5.41<br>(3.42;8.37)              | 8.29<br>(4.61;13.93)             | 53.15<br>(15.49;103.05)   | 11.53<br>(6.42;19.66)             | 113.07<br>(59.23;184.63)  |
| Kiribati                                      | 0.58<br>(0.45;0.81)              | 0.8<br>(0.47;1.52)               | 38.72<br>(-8.07;153.13)   | 1.16<br>(0.66;2.31)               | 100.81<br>(26.69;282.23)  |
| Marshall Islands                              | 3.83<br>(0.04;21.79)             | 8.9<br>(0.09;57.26)              | 132.26<br>(11.11;283.66)  | 11.79<br>(0.14;72.01)             | 207.56<br>(63.07;392.31)  |
| Northern Mariana Islands                      | 0.58<br>(0.37;0.88)              | 0.83<br>(0.49;1.3)               | 41.12<br>(9.45;98.86)     | 1.32<br>(0.83;2.07)               | 125.88<br>(59.75;244.32)  |
| Papua New Guinea                              | 2194.95<br>(174.41;6585.57)      | 3430.58<br>(314.36;13294.76)     | 56.29<br>(-41.05;188.37)  | 3712.12<br>(309.67;14642.23)      | 69.12<br>(-42.27;222.79)  |
| Samoa                                         | 13.32<br>(0.17;75.08)            | 30.49<br>(0.35;195.22)           | 128.91<br>(3.71;294.23)   | 36.04<br>(0.46;220.69)            | 170.58<br>(33.03;357.55)  |
| Solomon Islands                               | 36.82<br>(0.46;209.96)           | 96.88<br>(1.09;629.12)           | 163.09<br>(19.26;337.52)  | 125.49<br>(1.57;776.02)           | 240.78<br>(69.61;456.18)  |
| Tonga                                         | 1.91<br>(1.17;3.15)              | 3.1<br>(1.7;5.42)                | 62.15<br>(23.5;115.16)    | 4.45<br>(2.57;7.52)               | 132.94<br>(73.29;225.98)  |
| Vanuatu                                       | 26.03<br>(0.32;137.06)           | 45.11<br>(0.51;297.35)           | 73.3<br>(-78.68;317.79)   | 59.14<br>(0.76;369.16)            | 127.2<br>(-67.55;445.58)  |
| <b>Southeast Asia</b>                         |                                  |                                  |                           |                                   |                           |
| Cambodia                                      | 2349.78<br>(630.25;4575.15)      | 1187.32<br>(260.83;2781.92)      | -49.47<br>(-84.37;12.72)  | 1035.21<br>(130.61;2621.98)       | -55.94<br>(-92.31;-0.25)  |
| Indonesia                                     | 15084.07<br>(12145.96;20575.33)  | 19535.81<br>(15806.6;26250.83)   | 29.51<br>(16.95;48.15)    | 22148.29<br>(18205.19;28675.95)   | 46.83<br>(30.69;71.7)     |
| Laos                                          | 985.32<br>(11.96;5459.98)        | 898.95<br>(9.27;5651.94)         | -8.77<br>(-55.71;49.53)   | 1221.31<br>(14.93;6988.14)        | 23.95<br>(-32.64;91.3)    |
| Malaysia                                      | 3513.89<br>(2816.72;4053.88)     | 4992.32<br>(3411.44;6083.03)     | 42.07<br>(12.22;65.26)    | 6583.03<br>(4582.76;7956.46)      | 87.34<br>(51.37;118.84)   |
| Maldives                                      | 1.01<br>(0.8;1.38)               | 1.41<br>(1.09;1.93)              | 39.25<br>(22.62;58)       | 2.04<br>(1.66;2.57)               | 101.64<br>(77.11;132.75)  |
| Mauritius                                     | 313.6<br>(227.45;363.52)         | 333.7<br>(259.56;426.09)         | 6.41<br>(-22.22;50.65)    | 407.01<br>(326.67;506.72)         | 29.79<br>(-0.56;83.15)    |
| Myanmar                                       | 14626.51<br>(10635.77;19818.62)  | 12062.13<br>(9131.89;16338.63)   | -17.53<br>(-26.4;-6.47)   | 16921.46<br>(12804.54;23621.32)   | 15.69<br>(2.07;32.11)     |
| Philippines                                   | 10538.92<br>(7142.01;16894.3)    | 16056.99<br>(9575.62;26171.67)   | 52.36<br>(20.01;85.41)    | 21440.83<br>(13414.79;35156.07)   | 103.44<br>(61.98;154.74)  |
| Sri Lanka                                     | 141.98<br>(109.27;174.98)        | 327.44<br>(195.86;476.92)        | 130.63<br>(31.21;246.27)  | 406.01<br>(257.48;552.99)         | 185.96<br>(75.06;313.81)  |
| Seychelles                                    | 6.79<br>(5.78;8.86)              | 6.39<br>(4.94;8.88)              | -5.99<br>(-16.13;5.54)    | 8.84<br>(6.61;12.6)               | 30.15<br>(12.53;49.96)    |
| Thailand                                      | 33034.11<br>(26017.54;45774.6)   | 24197.98<br>(18842.97;34030.55)  | -26.75<br>(-37.92;-15.06) | 20687.95<br>(15832.18;30760.02)   | -37.37<br>(-47.59;24.03)  |
| Timor-Leste                                   | 268.64<br>(3.41;1541.92)         | 288.59<br>(3.17;1797.45)         | 7.43<br>(-44.62;82.46)    | 382.38<br>(4.33;2437.33)          | 42.34<br>(-32.37;134.74)  |
| Vietnam                                       | 25260.55<br>(20775.86;32029.61)  | 20686.89<br>(16476.8;27769.37)   | -18.11<br>(-26.84;-8.4)   | 25027.77<br>(20858.48;32476.09)   | -0.92<br>(-8.83;9.55)     |
| <b>Sub-Saharan Africa</b>                     |                                  |                                  |                           |                                   |                           |
| <b>Central sub-Saharan Africa</b>             |                                  |                                  |                           |                                   |                           |
| Angola                                        | 27875.6<br>(21007.4;36549.02)    | 25237.52<br>(11583.66;41500.56)  | -9.46<br>(-61.27;59.72)   | 28387.22<br>(11099.05;48307.06)   | 1.84<br>(-62.63;85.99)    |

|                                    |                                    |                                    |                              |                                    |                            |
|------------------------------------|------------------------------------|------------------------------------|------------------------------|------------------------------------|----------------------------|
| Central African Republic           | 5375.9<br>(2693.68;7998.32)        | 5971.88<br>(1661.79;12525.6)       | 11.09<br>(-65.36;206.92)     | 6005.07<br>(1269.99;13156.51)      | 11.7<br>(-73.35;222.61)    |
| Congo (Brazzaville)                | 7331.01<br>(5547.37;9269.6)        | 7802.97<br>(5645.37;10333.19)      | 6.44<br>(-10.93;29.48)       | 8450.57<br>(5946.17;11334.77)      | 15.27<br>(-5.12;40.96)     |
| DR Congo                           | 16313.3<br>(9425.15;24679.28)      | 20978.34<br>(6717.05;42792.91)     | 28.6<br>(-54.71;159.29)      | 22874.85<br>(4771.32;50352)        | 40.22<br>(-67.25;203.46)   |
| Equatorial Guinea                  | 4068.04<br>(2961.21;5352.5)        | 3137.32<br>(929.79;6967.85)        | -22.88<br>(-76.19;48.97)     | 3517.91<br>(729.78;8286.9)         | -13.52<br>(-82.89;75.7)    |
| Gabon                              | 1893.6<br>(1129.79;2692.7)         | 917.58<br>(527.79;1564.93)         | -51.54<br>(-67.66;-18.59)    | 846.95<br>(459.92;1522.2)          | -55.27<br>(-72.03;-18.37)  |
| <b>Eastern sub-Saharan Africa</b>  |                                    |                                    |                              |                                    |                            |
| Burundi                            | 1688.45<br>(904.95;2600.95)        | 4320.18<br>(1337.89;9466.01)       | 155.87<br>(6.76;374.28)      | 4929.05<br>(1117.97;11413.03)      | 191.93<br>(-7.44;462.54)   |
| Comoros                            | 2.26<br>(0.04;13.2)                | 14.83<br>(0.35;83)                 | 556.83<br>(170.7;2699.69)    | 19.03<br>(0.45;109.56)             | 742.97<br>(263.85;3546.19) |
| Djibouti                           | 631.2<br>(312.52;1093.07)          | 947.78<br>(291.97;1952.48)         | 50.16<br>(-51.8;211.18)      | 975.61<br>(285.92;2058.41)         | 54.56<br>(-55.25;227.94)   |
| Eritrea                            | 1402.44<br>(868.77;1990.56)        | 2040.76<br>(592.72;4089.85)        | 45.52<br>(-50.64;160.4)      | 2274.99<br>(485.07;4728.59)        | 62.22<br>(-61.32;201.8)    |
| Ethiopia                           | 16676.38<br>(12474.6;21795.93)     | 23861.18<br>(14992.83;35457.05)    | 43.08<br>(-6.7;105.46)       | 32122.11<br>(17464.23;51996.31)    | 92.62<br>(10.08;194.13)    |
| Kenya                              | 97329.12<br>(77874.06;121849.1)    | 117941.11<br>(82447.55;168301.16)  | 21.18<br>(-2.46;48.37)       | 170077.44<br>(118419.1;235557.58)  | 74.74<br>(39.65;112.01)    |
| Madagascar                         | 1829.45<br>(910.66;2868.18)        | 10738.61<br>(1290.95;50491.25)     | 486.99<br>(7.66;2150.32)     | 15633.23<br>(1936.29;68491.33)     | 754.53<br>(58.7;2966.81)   |
| Malawi                             | 54099.01<br>(43311.28;68026.25)    | 39440.94<br>(23051.66;58662.43)    | -27.09<br>(-61.74;13.8)      | 39167.99<br>(18103.12;61856.1)     | -27.6<br>(-69.76;21.18)    |
| Mozambique                         | 174428.18<br>(148563.34;207475.74) | 135760.95<br>(88081.71;195694.4)   | -22.17<br>(-49.89;9.15)      | 153643.69<br>(95867.82;223143.49)  | -11.92<br>(-44.88;24.14)   |
| Rwanda                             | 11511.57<br>(9380.48;14129.89)     | 9157.47<br>(6287.61;13228.5)       | -20.45<br>(-44.25;14.5)      | 9244.53<br>(5853.49;13839.34)      | -19.69<br>(-48.3;21.92)    |
| Somalia                            | 2716.47<br>(292.78;10425.63)       | 3172.21<br>(167.74;12401.28)       | 16.78<br>(-67.87;127.6)      | 4772.81<br>(151.08;19357.46)       | 75.7<br>(-71.75;267.18)    |
| South Sudan                        | 7048.58<br>(580.75;2238.88)        | 4946.67<br>(200.45;18987.02)       | -29.82<br>(-68.77;-7.67)     | 5482.27<br>(189.43;20659.83)       | -22.22<br>(-71.91;6.1)     |
| Tanzania                           | 56959.9<br>(23074.26;98006.36)     | 62253.26<br>(6826.47;183294.35)    | 9.29<br>(-90.48;459.98)      | 67996.2<br>(195.75;216250.95)      | 19.38<br>(-99.74;558.38)   |
| Uganda                             | 114642.88<br>(79823.51;143136.91)  | 72704.12<br>(25610.84;201024.21)   | -36.58<br>(-79.63;123.34)    | 72104.52<br>(11371.22;242617.42)   | -37.11<br>(-90.91;168.17)  |
| Zambia                             | 58240.53<br>(46654.81;71666.5)     | 48738.09<br>(32026.12;71313.04)    | -16.32<br>(-44.78;32.86)     | 55778.02<br>(35543.85;83732.01)    | -4.23<br>(-39;53.99)       |
| <b>Southern sub-Saharan Africa</b> |                                    |                                    |                              |                                    |                            |
| Botswana                           | 14942.83<br>(12126.86;18201.11)    | 9332.43<br>(6769.69;12328.06)      | -37.55<br>(-56.12;-14.31)    | 9508.97<br>(6620.74;12982.67)      | -36.36<br>(-56.08;-11.5)   |
| Lesotho                            | 21977.88<br>(18242.75;26872.17)    | 13837<br>(10151.79;18269.42)       | -37.04<br>(-56.7;-16.35)     | 13427.37<br>(9476.91;18188.34)     | -38.91<br>(-60;-17.85)     |
| Namibia                            | 11172.21<br>(8594.6;14324.07)      | 8455.25<br>(5098.24;13439.77)      | -24.32<br>(-53.68;24.33)     | 8206.44<br>(5065.35;12615.66)      | -26.55<br>(-55.23;16.54)   |
| South Africa                       | 413120.32<br>(339512.54;499977.23) | 282117.95<br>(208107.68;354882.78) | -31.71<br>(-45.51;-17.59)    | 310443.92<br>(222835.31;397728.64) | -24.85<br>(-41.22;-7.3)    |
| eSwatini                           | 18083.28<br>(15525.67;21056.24)    | 2297.71<br>(505.17;4350.93)        | -87.29***<br>(-97.32;-74.53) | 2649.65<br>(348.32;5248.56)        | -85.35<br>(-98.06;-69.8)   |
| Zimbabwe                           | 45748.57<br>(21577.72;82427.63)    | 69580.22<br>(7055.46;147350.05)    | 52.09<br>(-90.1;473.81)      | 79840.97<br>(2701.55;171853.29)    | 74.52<br>(-96.16;556.24)   |
| <b>Western sub-Saharan Africa</b>  |                                    |                                    |                              |                                    |                            |
| Benin                              | 4889.74<br>(3706.61;6312.8)        | 4628.01<br>(2797.38;6890.28)       | -5.35<br>(-41.76;32.52)      | 5014.94<br>(2810.86;7735.06)       | 2.56<br>(-42.67;47.57)     |
| Burkina Faso                       | 2762.6<br>(1570.9;4234.03)         | 3718.54<br>(916.05;7261.27)        | 34.6<br>(-71.17;228.51)      | 3954.47<br>(388.76;8436.69)        | 43.14<br>(-87.01;283.52)   |
| Cameroon                           | 37334.82<br>(26045.26;49075.24)    | 34336.87<br>(11742.22;54204.83)    | -8.03<br>(-68.43;52.25)      | 37272.77<br>(10268.66;61420.9)     | -0.17<br>(-72.35;70.52)    |
| Cape Verde                         | 271.08<br>(192.7;373.5)            | 352.75<br>(250.57;493.58)          | 30.13<br>(12.73;48.12)       | 373.47<br>(264.23;519.31)          | 37.77<br>(19.01;56.58)     |
| Chad                               | 8524.89<br>(6089.51;11545.08)      | 11324.75<br>(4775.51;18928.19)     | 32.84<br>(-41.06;136.91)     | 13587.51<br>(4736.27;23626.55)     | 59.39<br>(-41.35;203.64)   |
| Cote d'Ivoire                      | 28740.77<br>(11762.28;46075.1)     | 51694.87<br>(10830.55;96546.72)    | 79.87<br>(-57.48;486.91)     | 56258.08<br>(10069.75;109083.7)    | 95.74<br>(-60.76;566.74)   |
| The Gambia                         | 1731.77<br>(1181.07;2447.8)        | 1444.23<br>(483.05;2498.88)        | -16.6<br>(-69.03;36.08)      | 1692.97<br>(497.46;3018.48)        | -2.24<br>(-69.12;65.5)     |
| Ghana                              | 16490.14<br>(11002.27;23528.55)    | 27602.33<br>(15963.36;44441.74)    | 67.39<br>(-7.3;193.13)       | 28610.55<br>(15774.51;46667.15)    | 73.5<br>(-7.65;205.79)     |
| Guinea                             | 7746.12<br>(5172.81;10289.67)      | 5980.35<br>(3206.27;9508.67)       | -22.8<br>(-56.17;26.5)       | 7074.11<br>(3774.84;11417.9)       | -8.68<br>(-48.57;50.32)    |
| Guinea-Bissau                      | 3155.29<br>(1992.61;4590.69)       | 2416.96<br>(858.45;4465.61)        | -23.4<br>(-70.91;31.77)      | 2732.37<br>(910.16;5072.63)        | -13.4<br>(-68;52.75)       |
| Liberia                            | 1571.46<br>(867.54;2433.43)        | 2857.24<br>(1300.98;4853.28)       | 81.82<br>(-9.37;235.47)      | 3197.81<br>(1372.51;5534.64)       | 103.49<br>(-3.14;288.36)   |
| Mali                               | 9021.4<br>(6774.81;11641.28)       | 8202.01<br>(5587.79;11126.39)      | -9.08<br>(-26.39;9.88)       | 9834.86<br>(6517;13552.47)         | 9.02<br>(-13.48;34.29)     |
| Mauritania                         | 74.89<br>(2.05;446.36)             | 88.6<br>(2.52;476.49)              | 18.32<br>(-30.09;130.28)     | 130.22<br>(3.88;727.33)            | 73.9<br>(3.12;237.81)      |
| Niger                              | 1670.51<br>(1030.78;2404.91)       | 2842.7<br>(1711.92;4265.28)        | 70.17<br>(16.55;149.33)      | 3439.28<br>(1897.61;5364.43)       | 105.88<br>(32.69;206.14)   |
| Nigeria                            | 289543.2<br>(228393.04;359264.02)  | 227542.58<br>(164431.42;296715.1)  | -21.41<br>(-36.24;-0.65)     | 268159.46<br>(189389.91;355042.92) | -7.39<br>(-26.36;19.12)    |
| Sao Tome and Principe              | 1.07<br>(0.29;2.37)                | 1.78<br>(0.45;3.91)                | 66.74<br>(-32.52;317.13)     | 2.87<br>(0.71;6.02)                | 168.39<br>(10.42;556.15)   |



|              |                              |                              |                          |                              |                          |
|--------------|------------------------------|------------------------------|--------------------------|------------------------------|--------------------------|
| Senegal      | 3344.13<br>(2215.28;4636.23) | 3909.01<br>(2411.47;5804.78) | 16.89<br>(-14.21;79.34)  | 6209.05<br>(3723.11;9346.78) | 85.67<br>(34.07;192.45)  |
| Sierra Leone | 3547.09<br>(1548.15;5670.55) | 3596.68<br>(656.84;7801.15)  | 1.4<br>(-82.61;196.17)   | 3918.43<br>(424.08;8764.71)  | 10.47<br>(-89.08;233.54) |
| Togo         | 5779.33<br>(3608.28;8287.42) | 4796.52<br>(1340.81;9423.25) | -17.01<br>(-76.91;78.36) | 4886.15<br>(731.53;10306.72) | -15.45<br>(-87.29;93.92) |

\*\*\*Meets Target

UI = Uncertainty Interval

Appendix Figure 1. Percentage of PLHIV on and off ART coverage in all GBD super-regions, by country, by sex, 2017  
Latin America and Caribbean

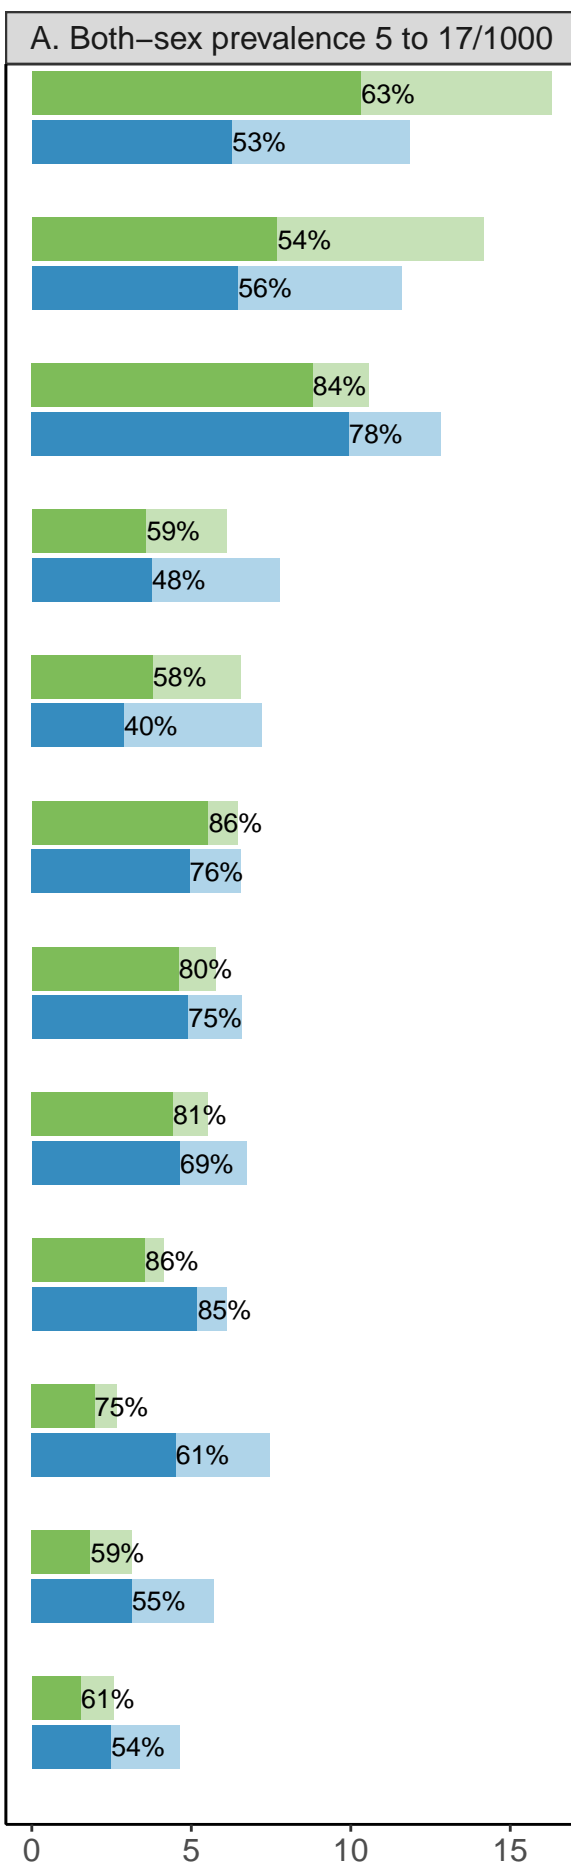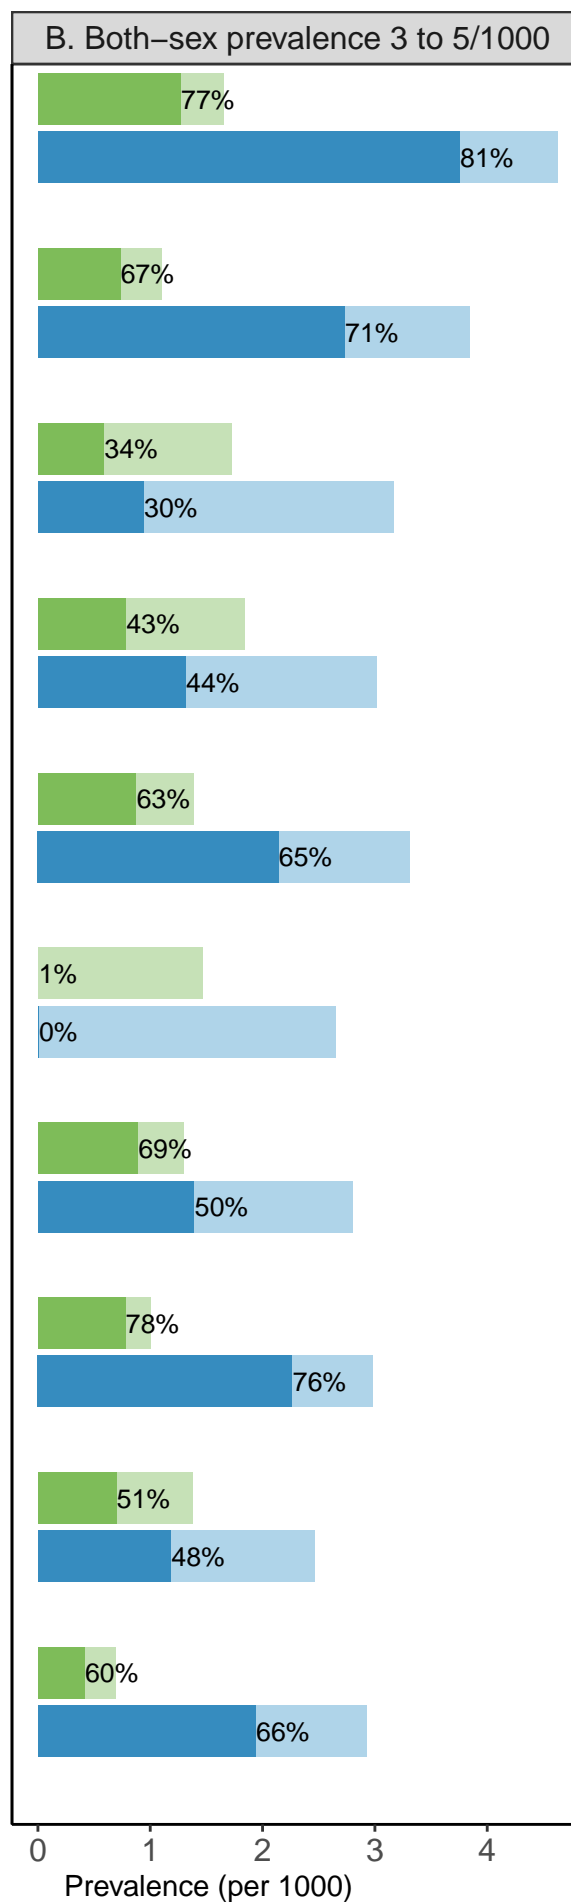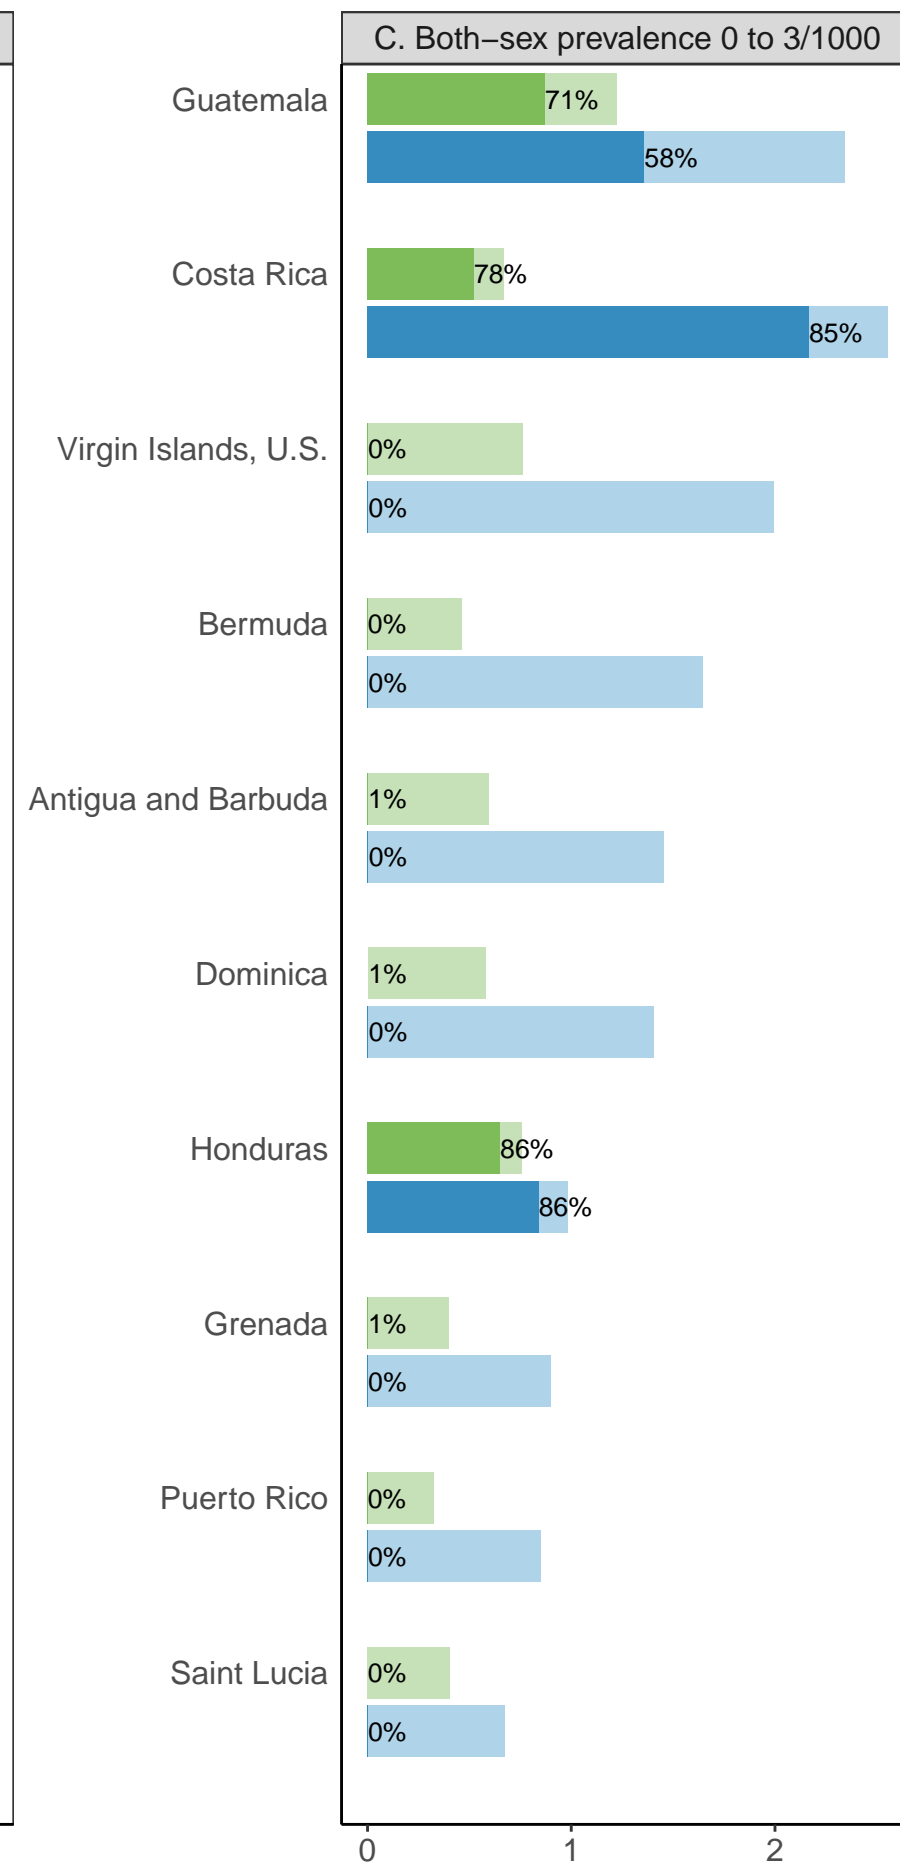

On ART, Females On ART, Males Off ART, Females Off ART, Males

# High-income

## A. Both-sex prevalence 3 to 27/1000

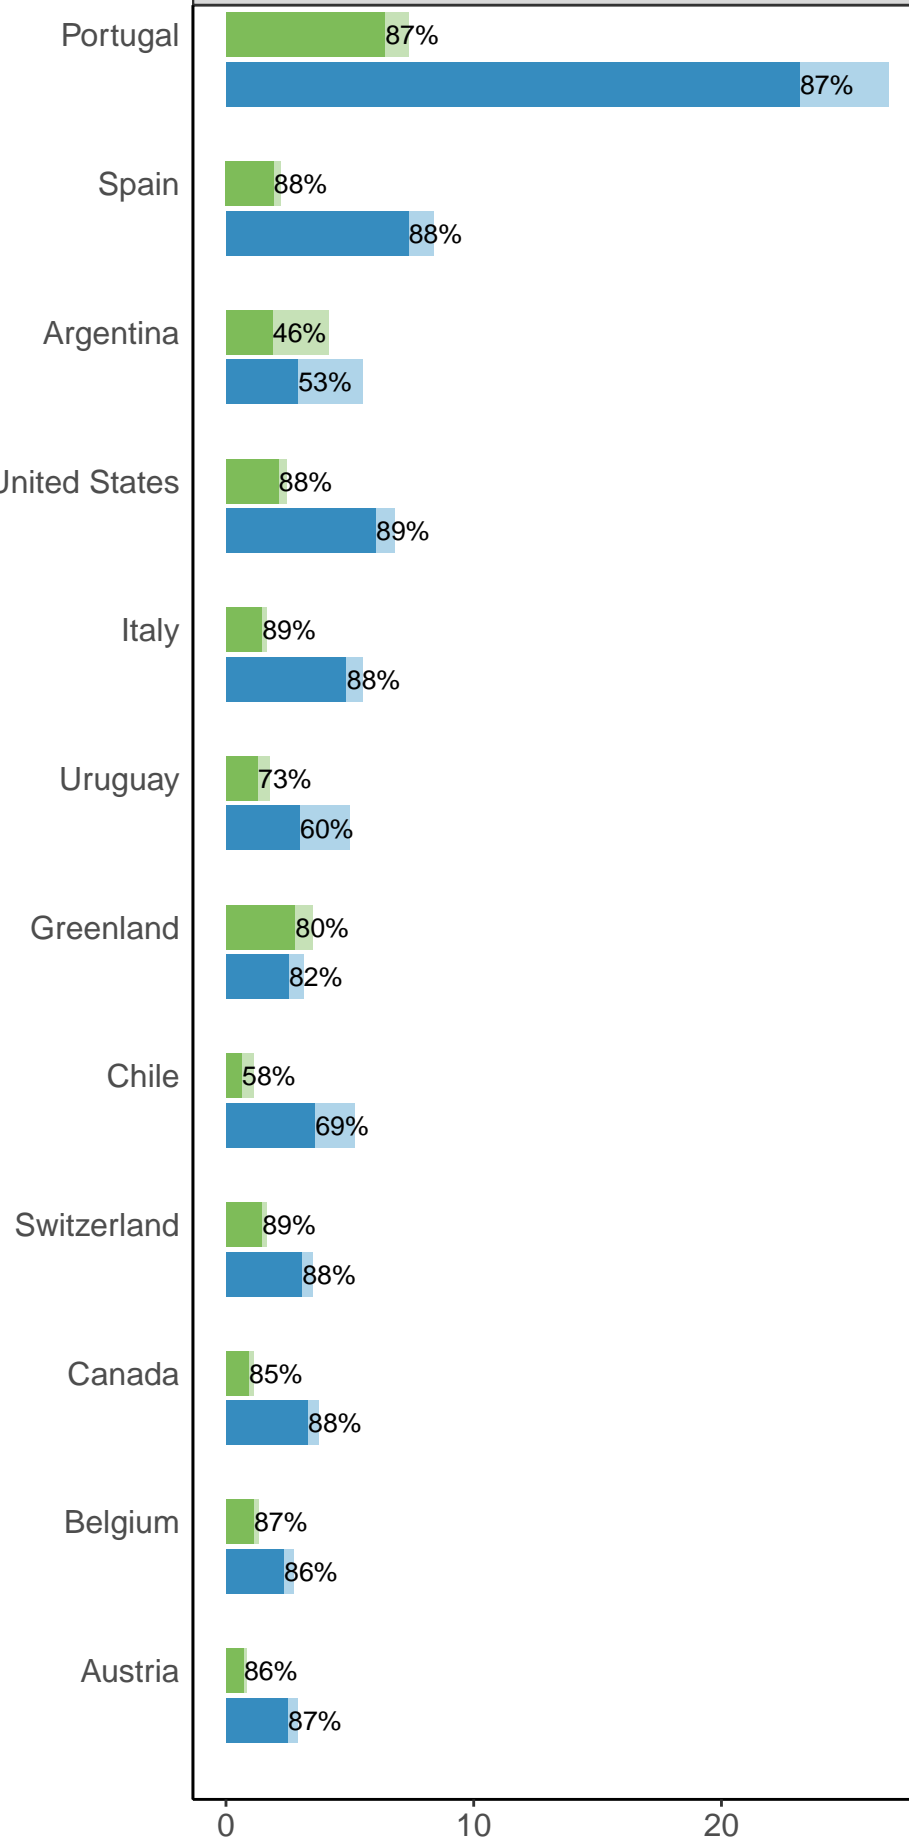

## B. Both-sex prevalence 2 to 3/1000

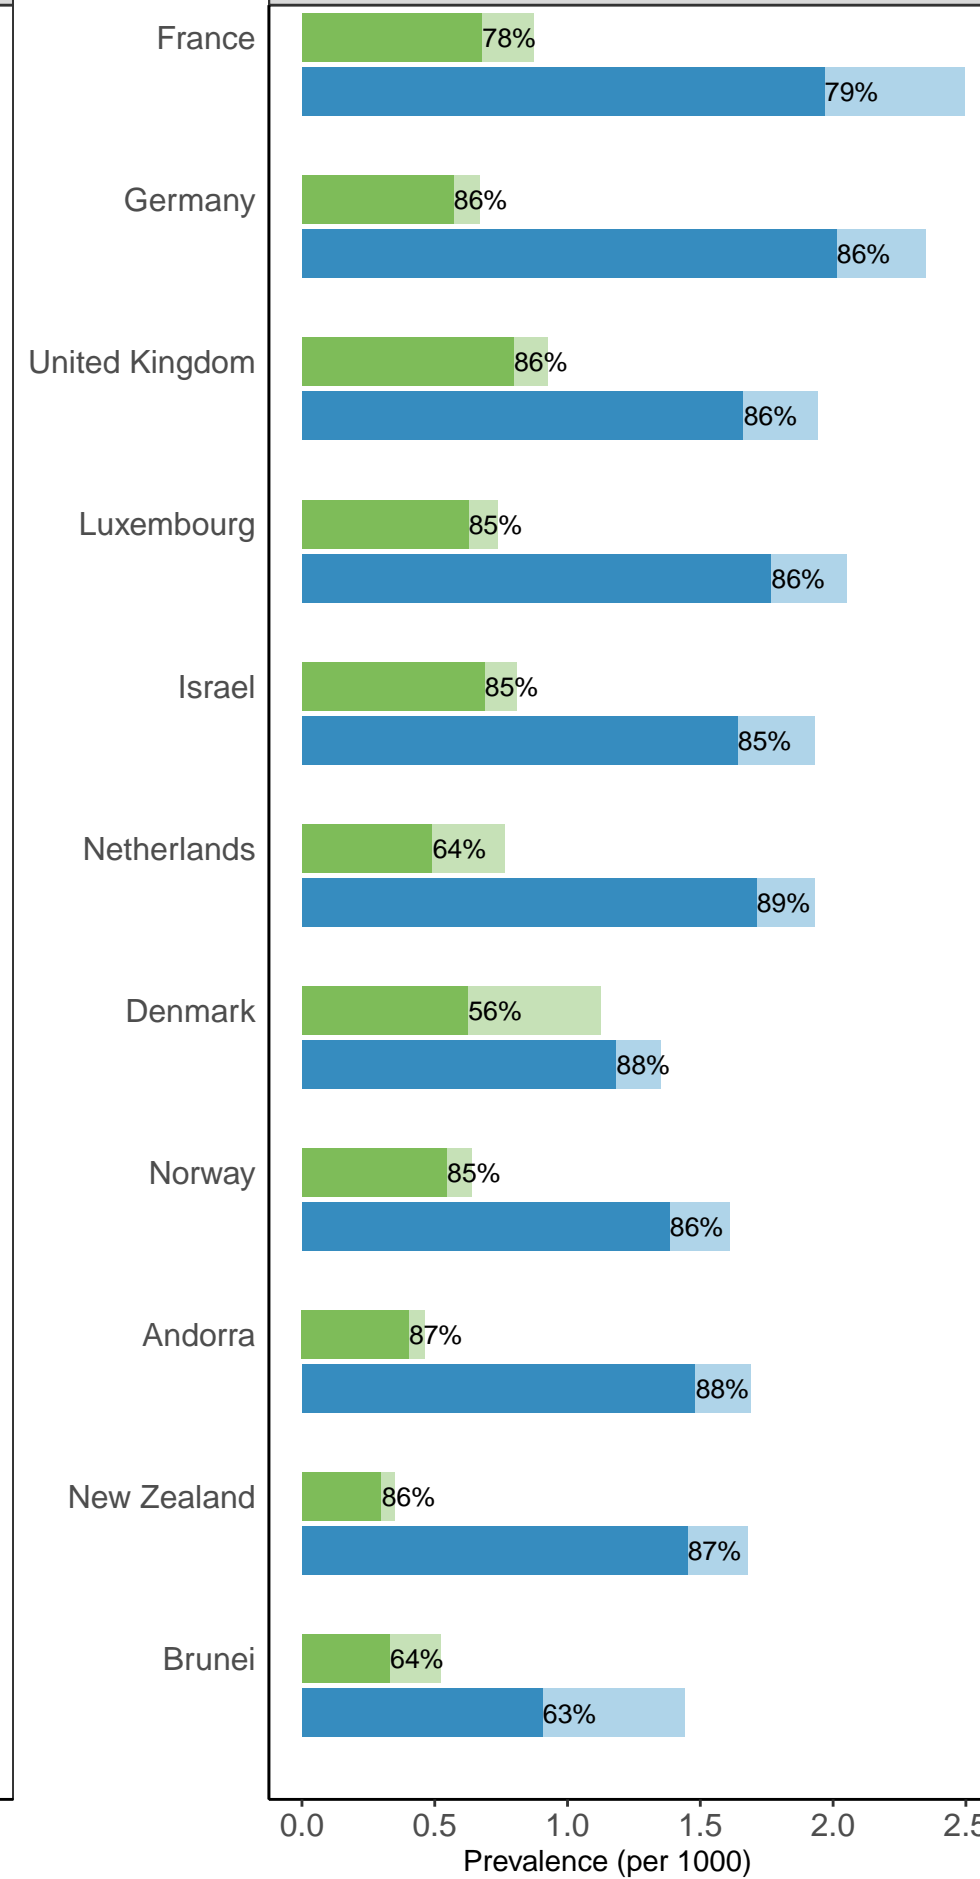

## C. Both-sex prevalence 0 to 2/1000

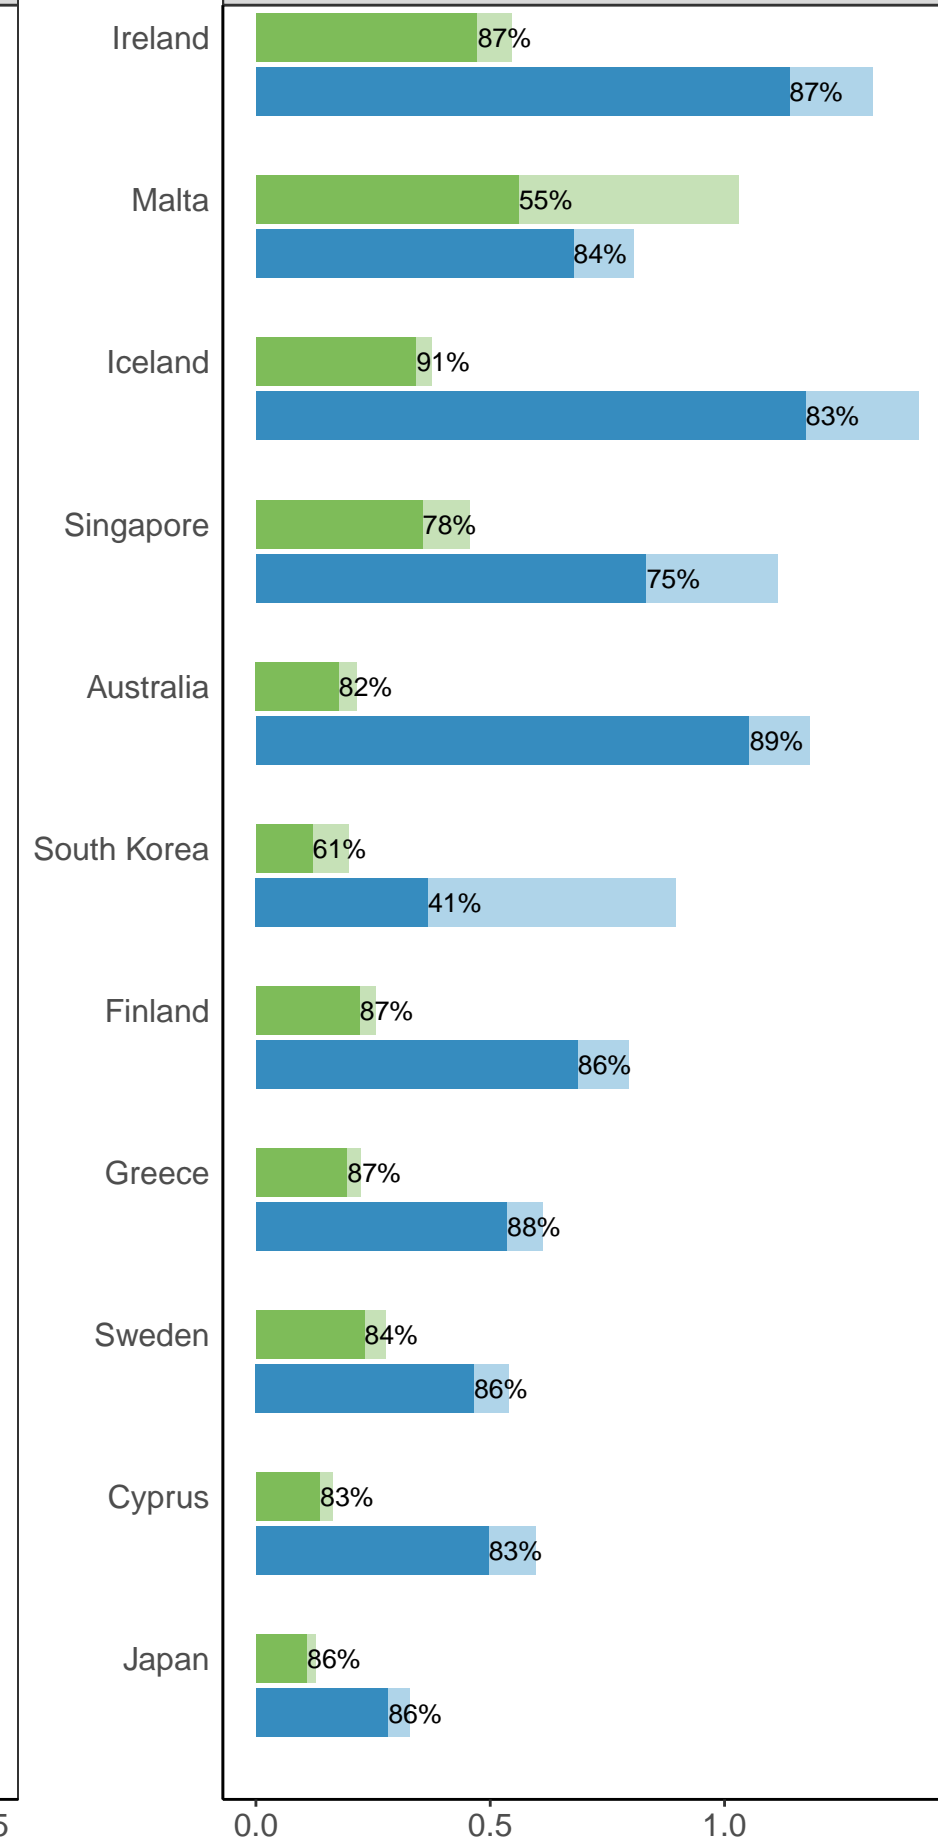

■ On ART, Females 
 ■ On ART, Males 
 ■ Off ART, Females 
 ■ Off ART, Males

# Central Europe, Eastern Europe, and Central Asia

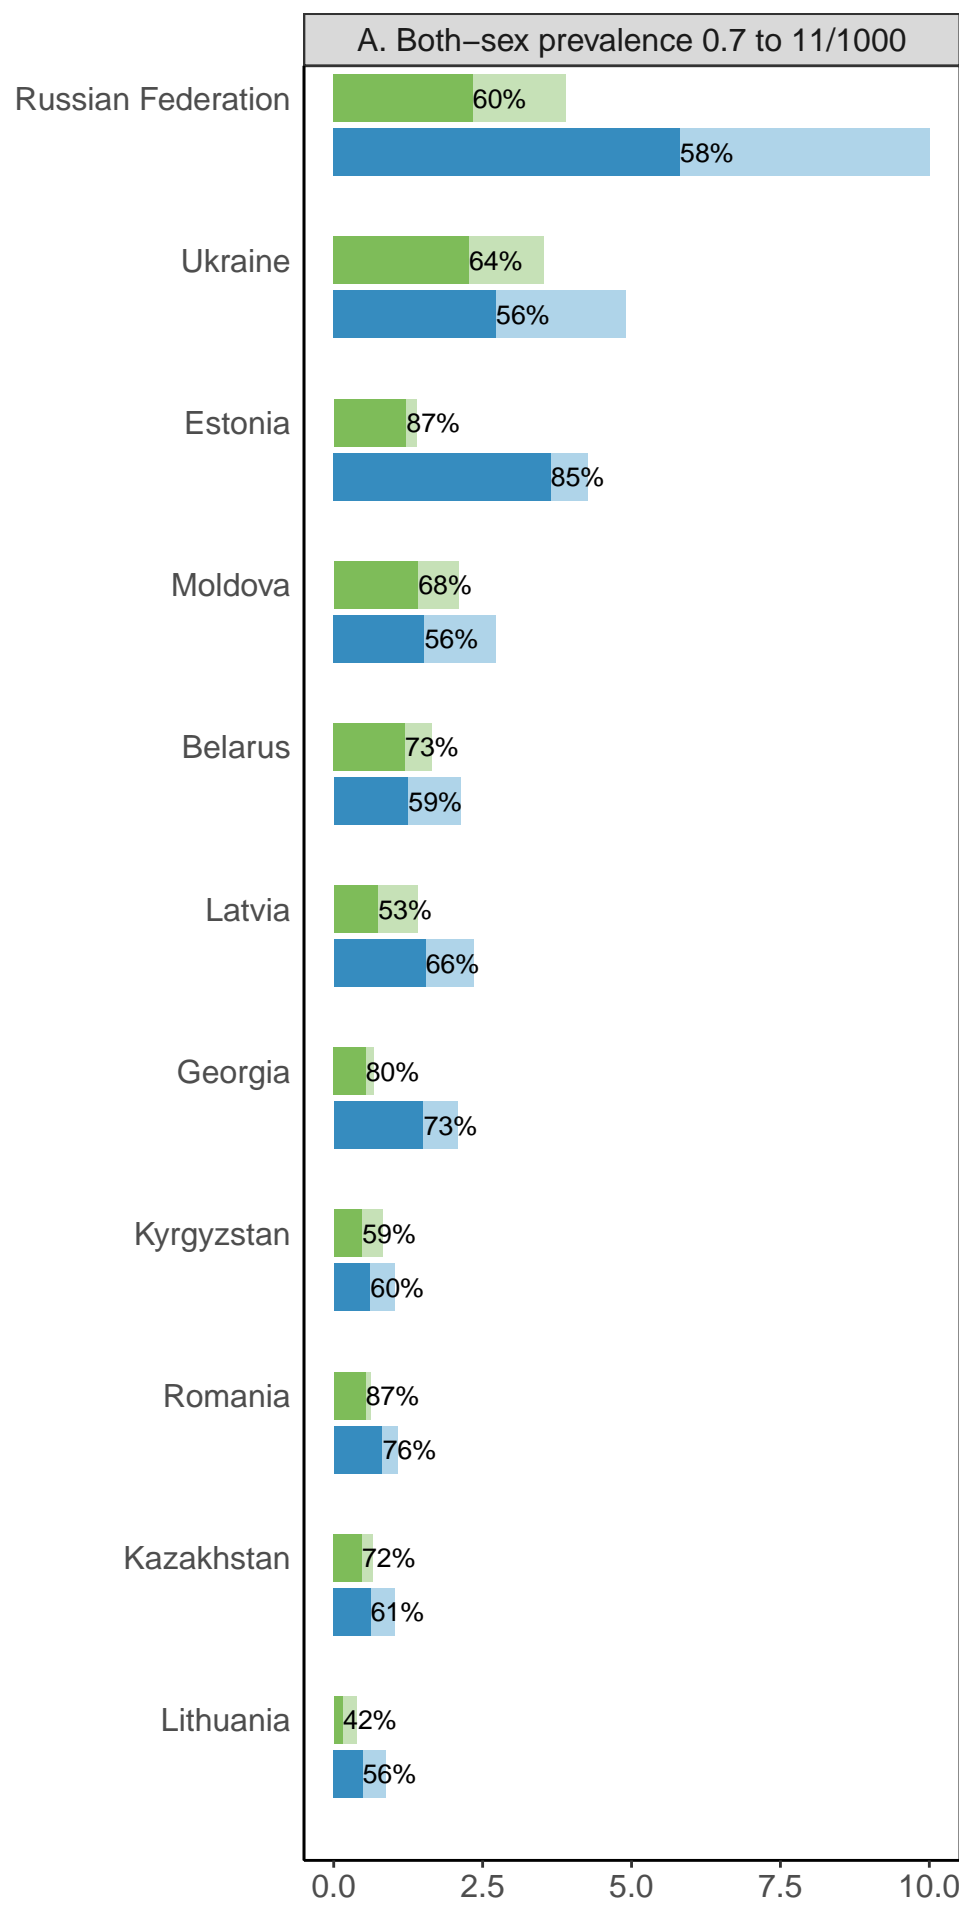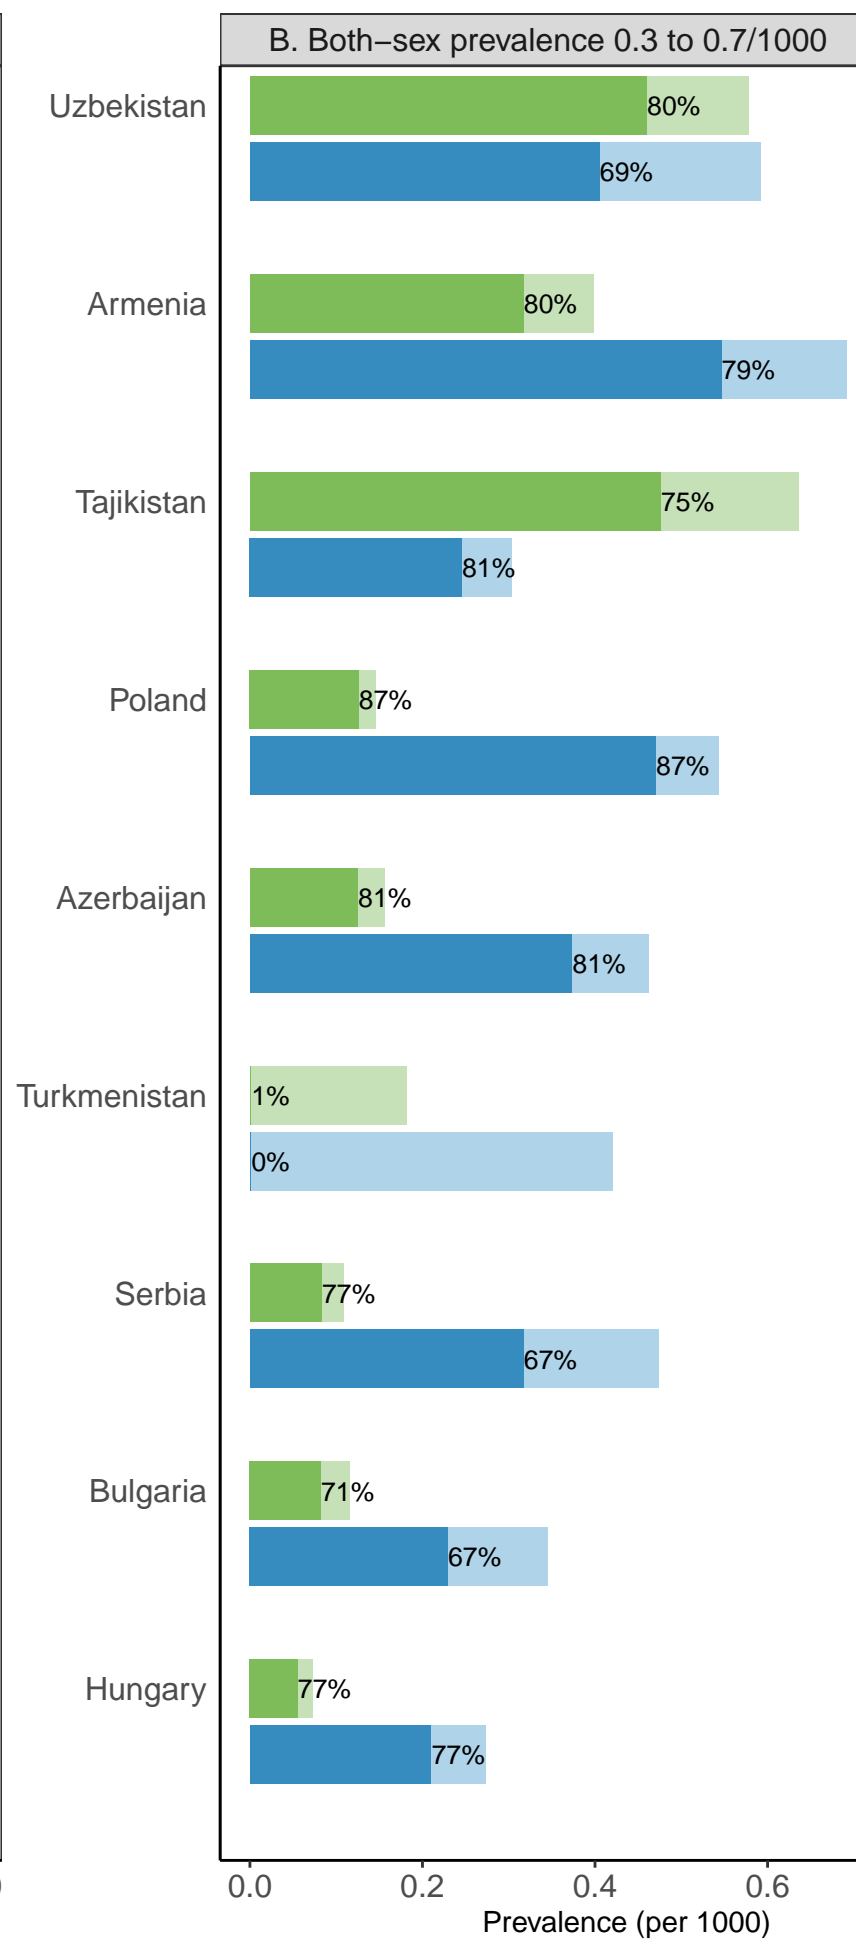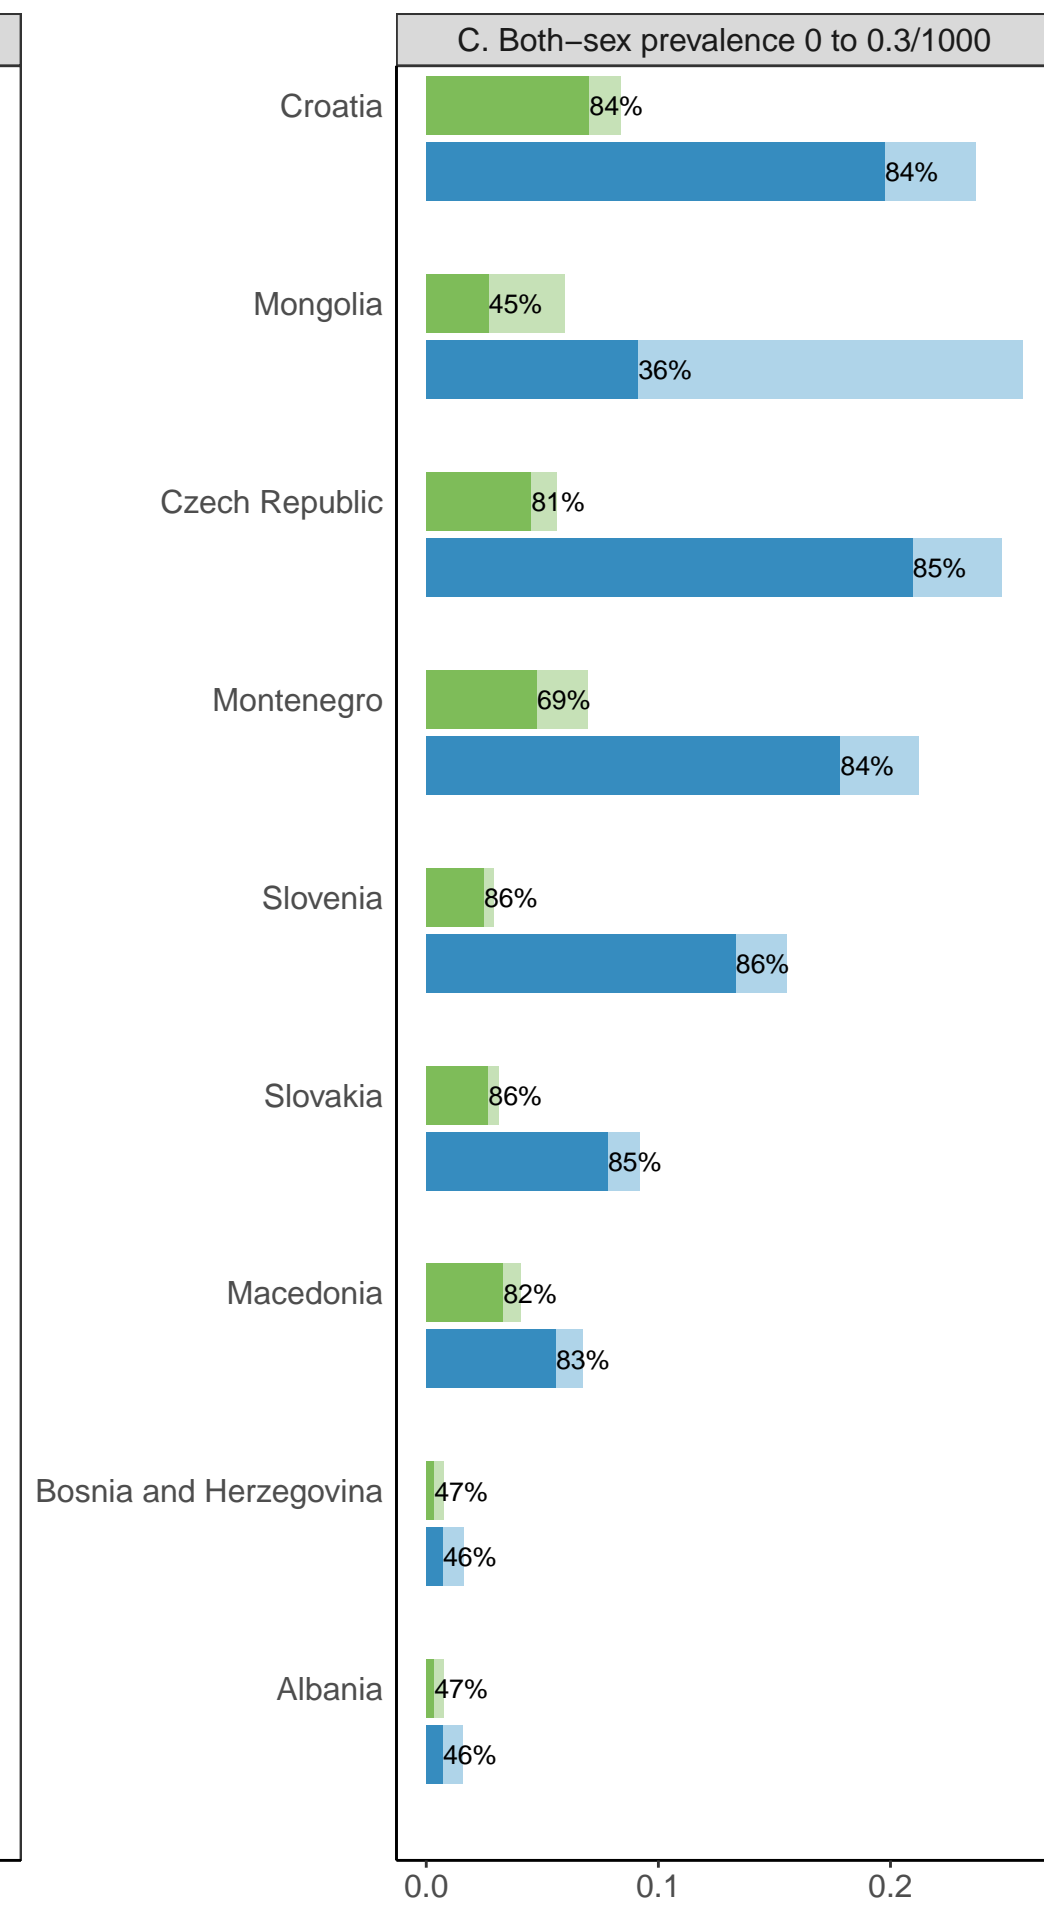

# Sub-Saharan Africa

A. Both-sex prevalence 27 to 213/1000

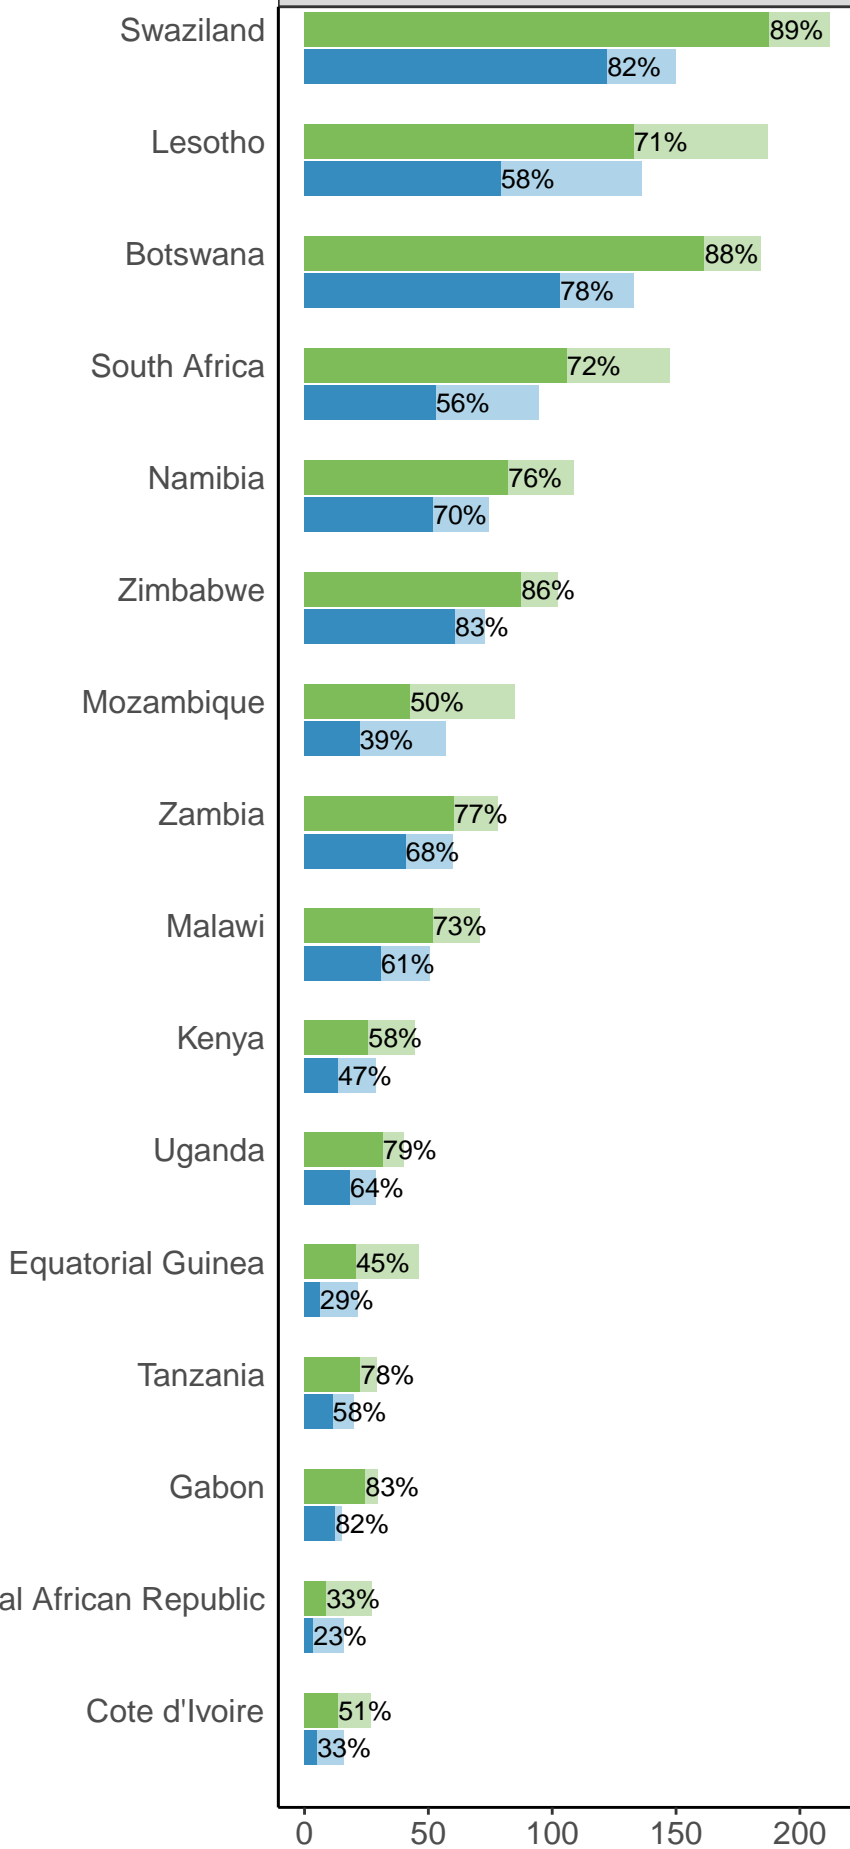

B. Both-sex prevalence 9 to 27/1000

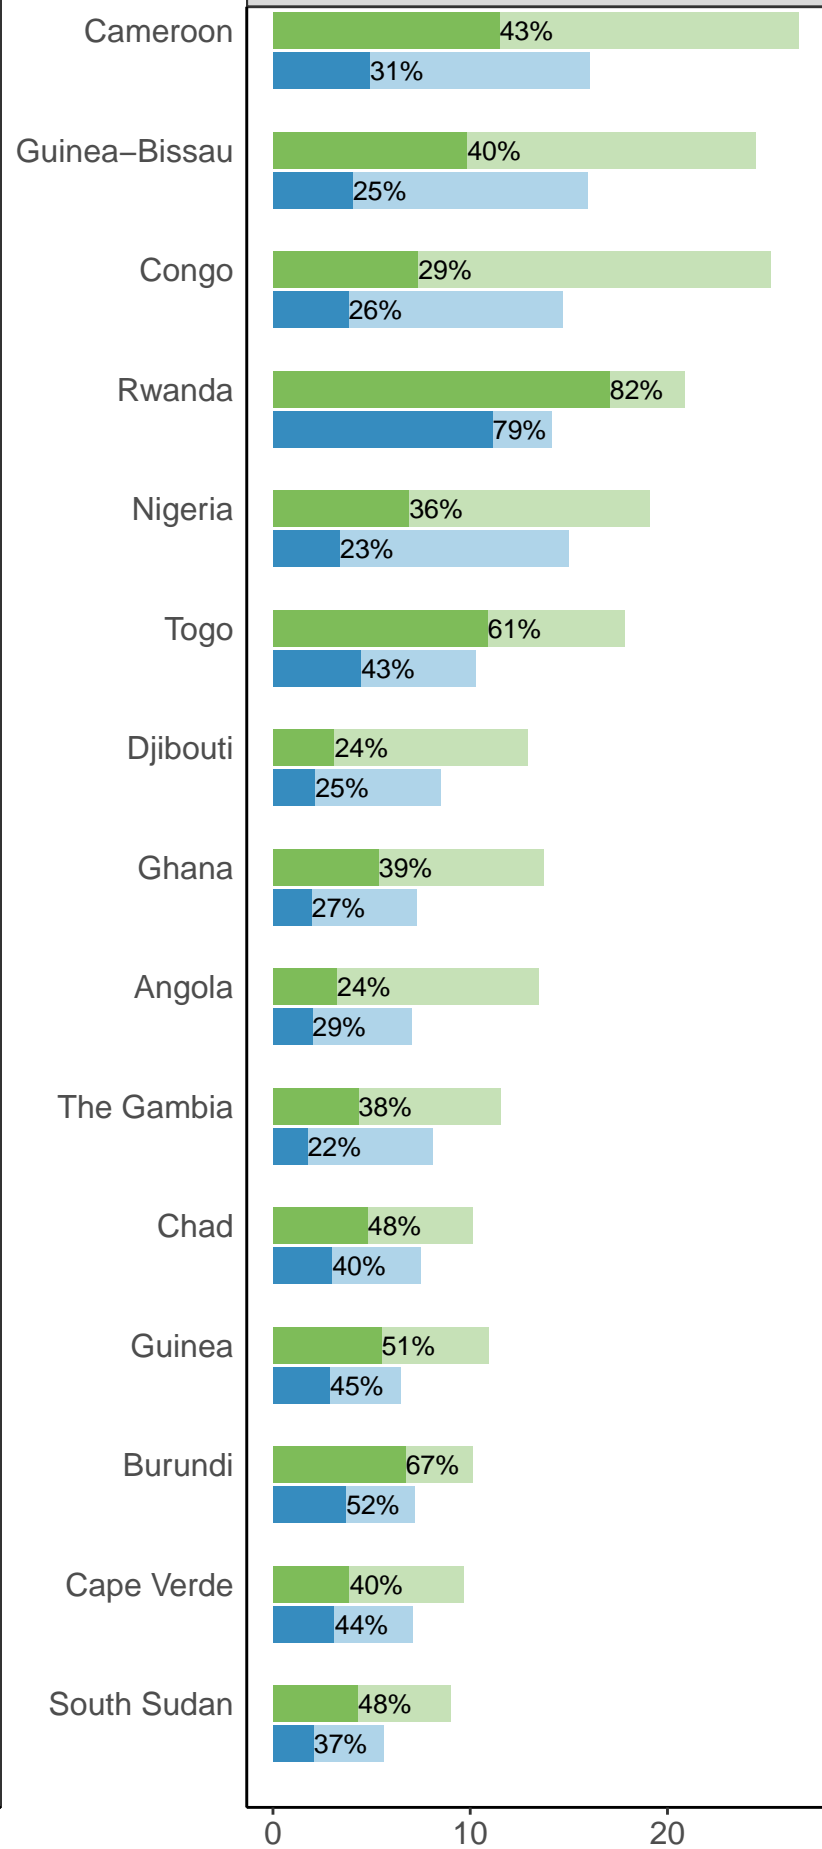

C. Both-sex prevalence 0 to 9/1000

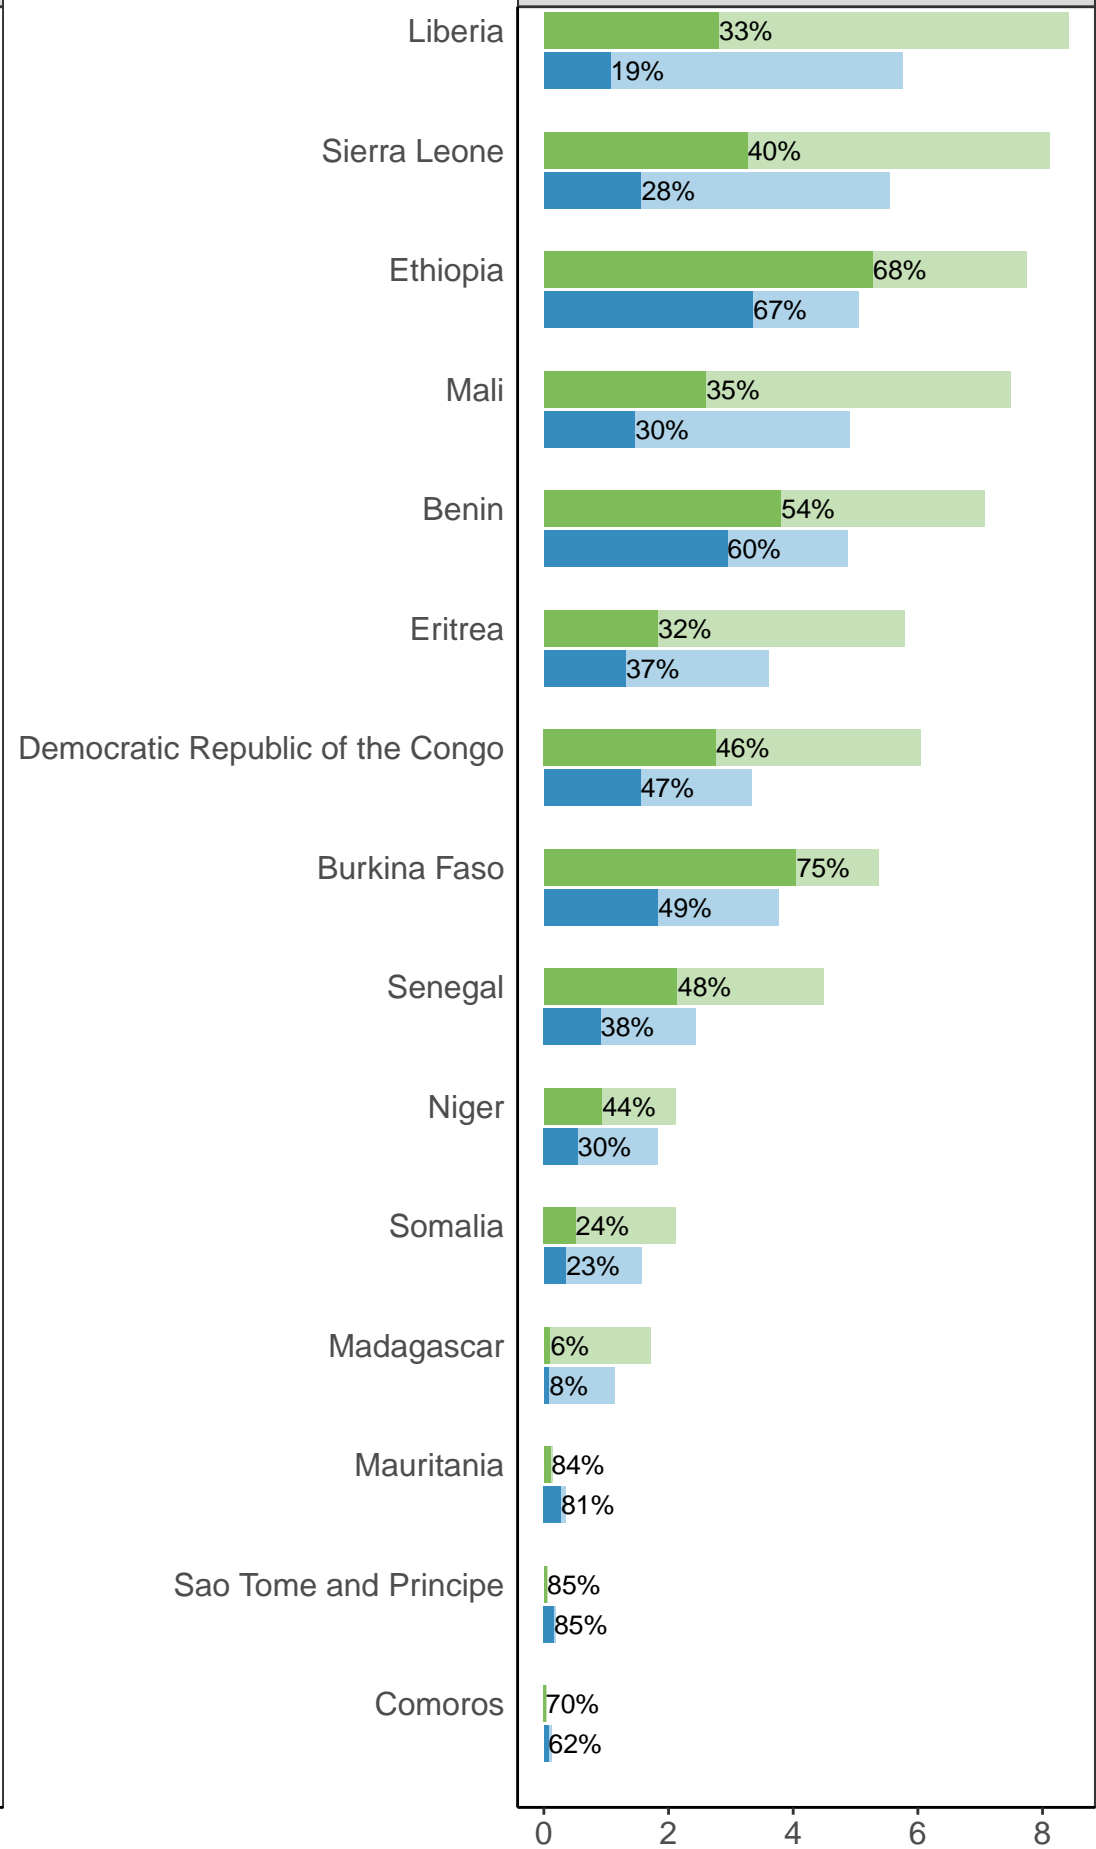

# Southeast Asia, East Asia, and Oceania

A. Both-sex prevalence 2 to 9/1000

B. Both-sex prevalence 0.7 to 2/1000

C. Both-sex prevalence 0 to 0.7/1000

Federated States of Micronesia

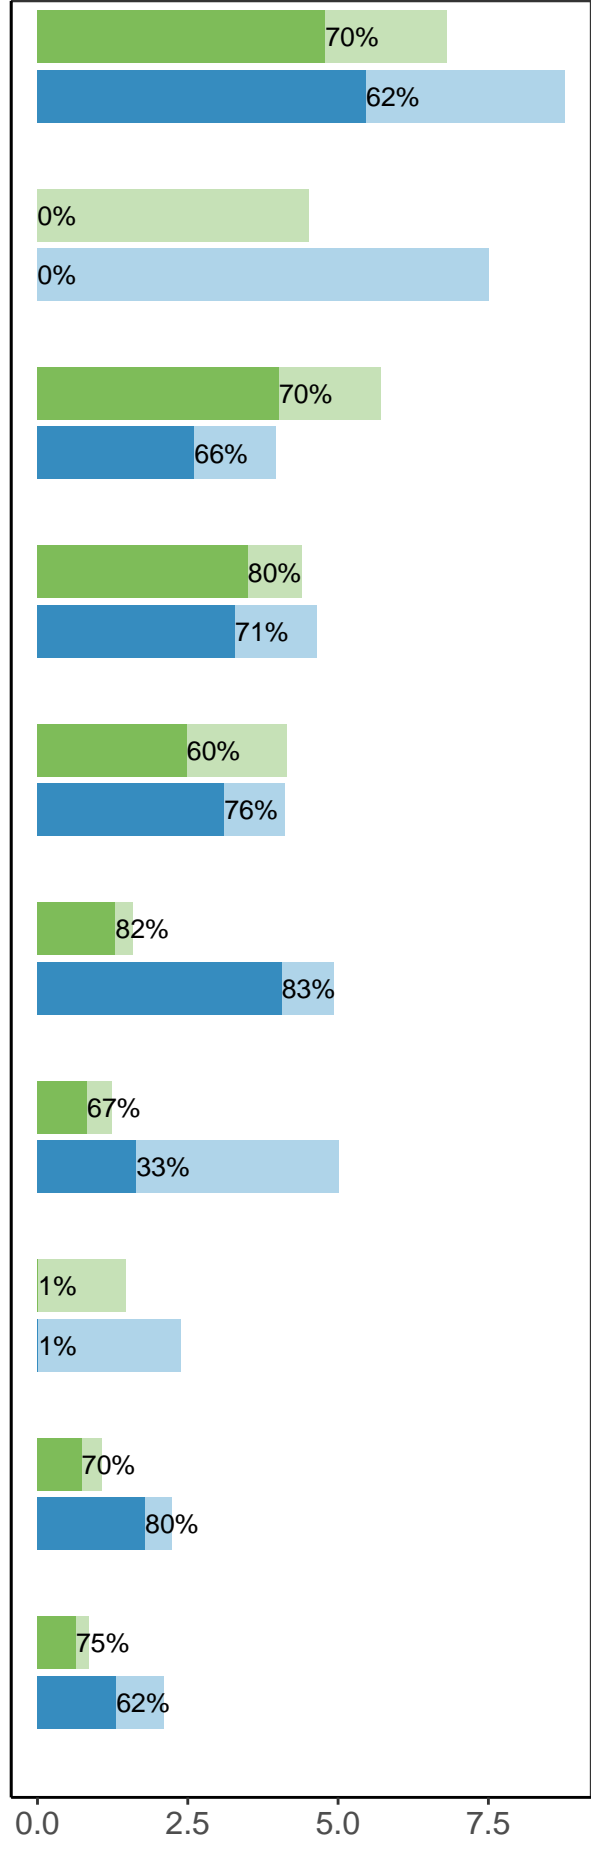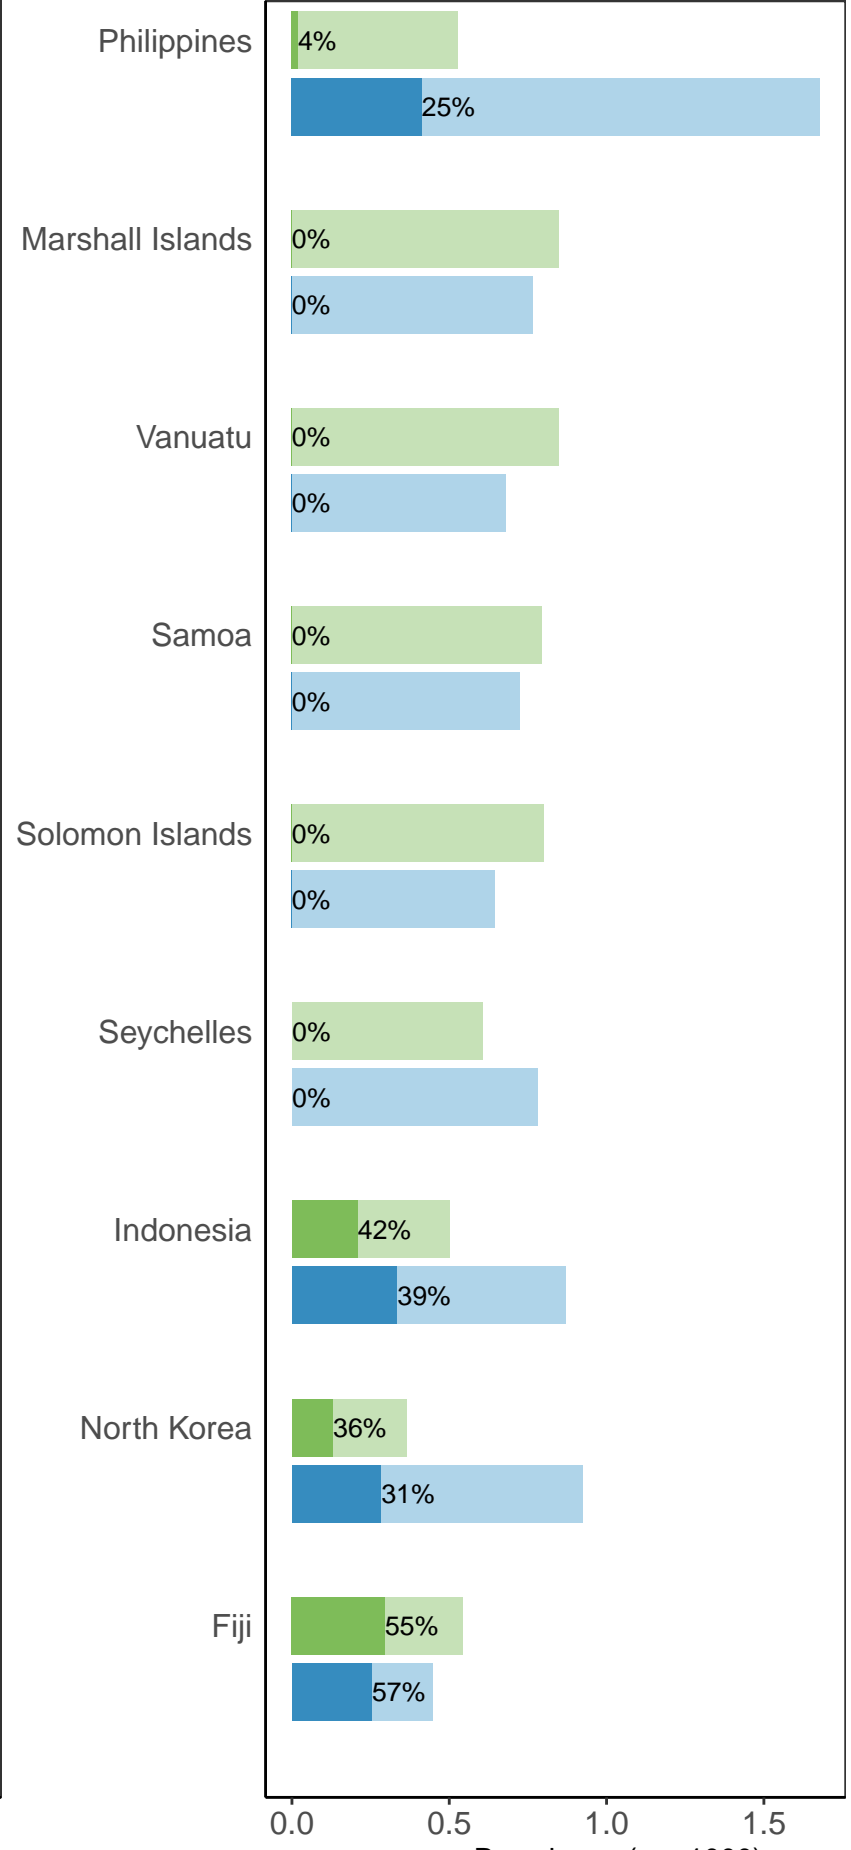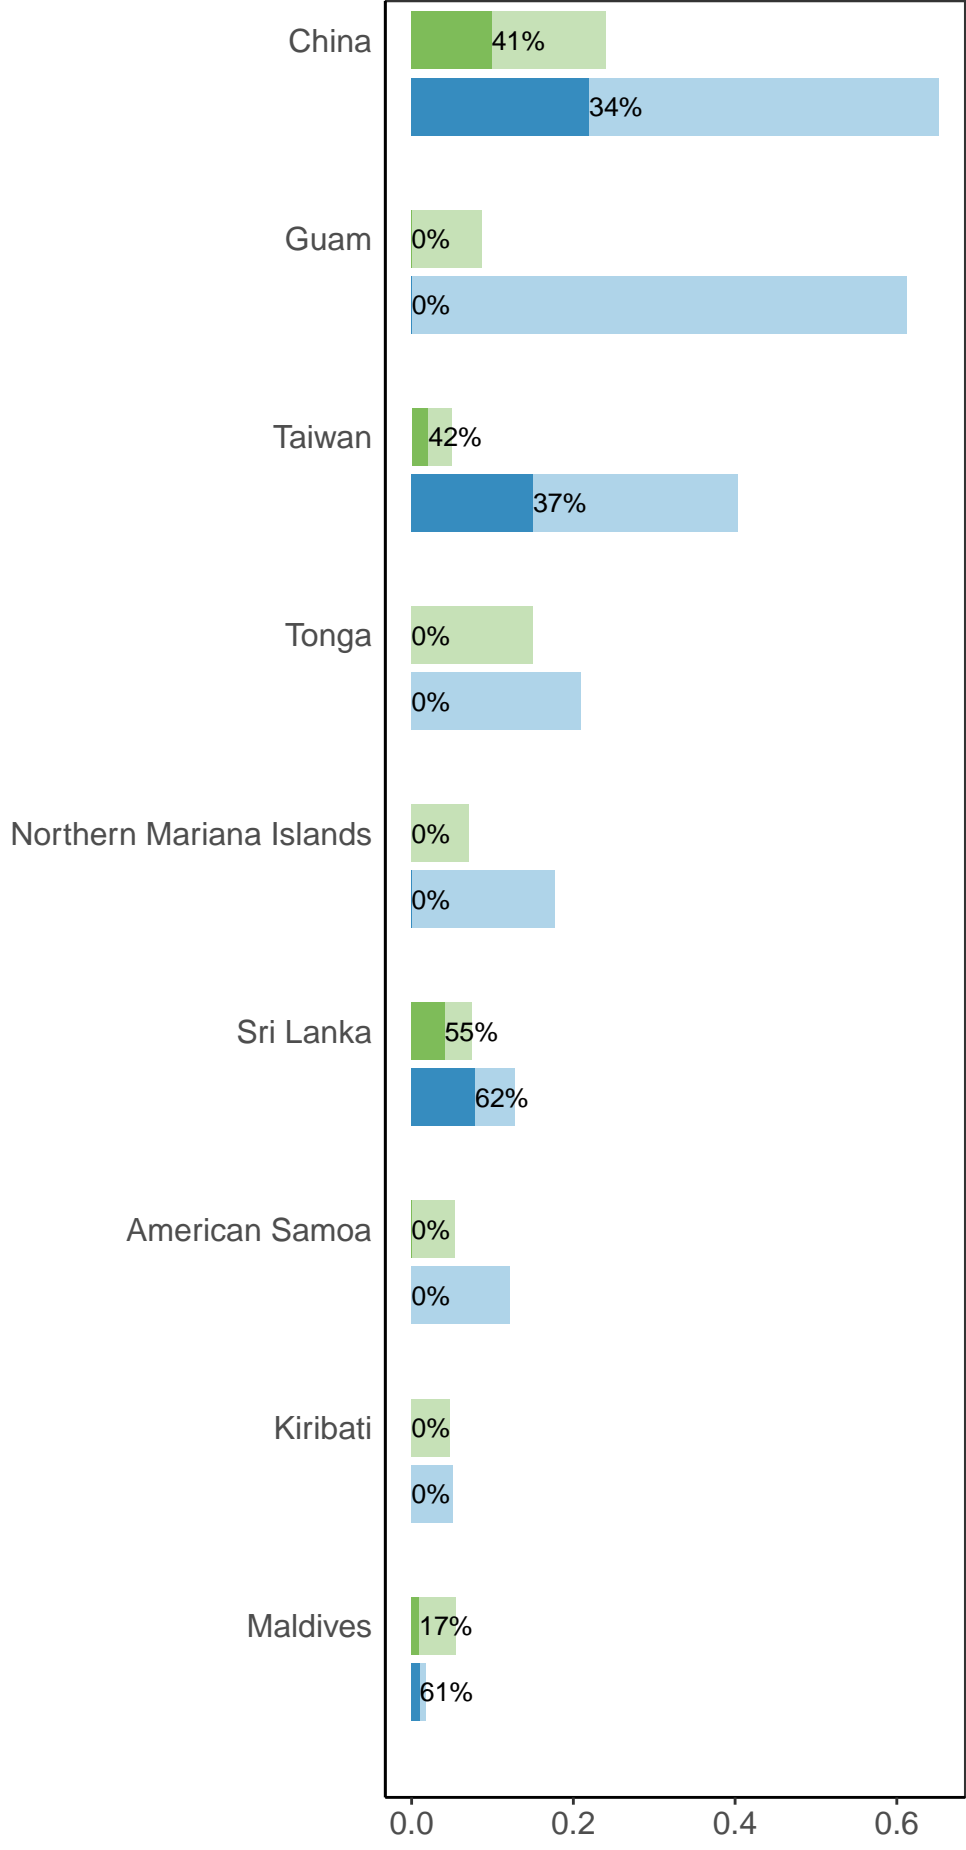

On ART, Females On ART, Males Off ART, Females Off ART, Males

# North Africa and Middle East

A. Both-sex prevalence 0.3 to 3/1000

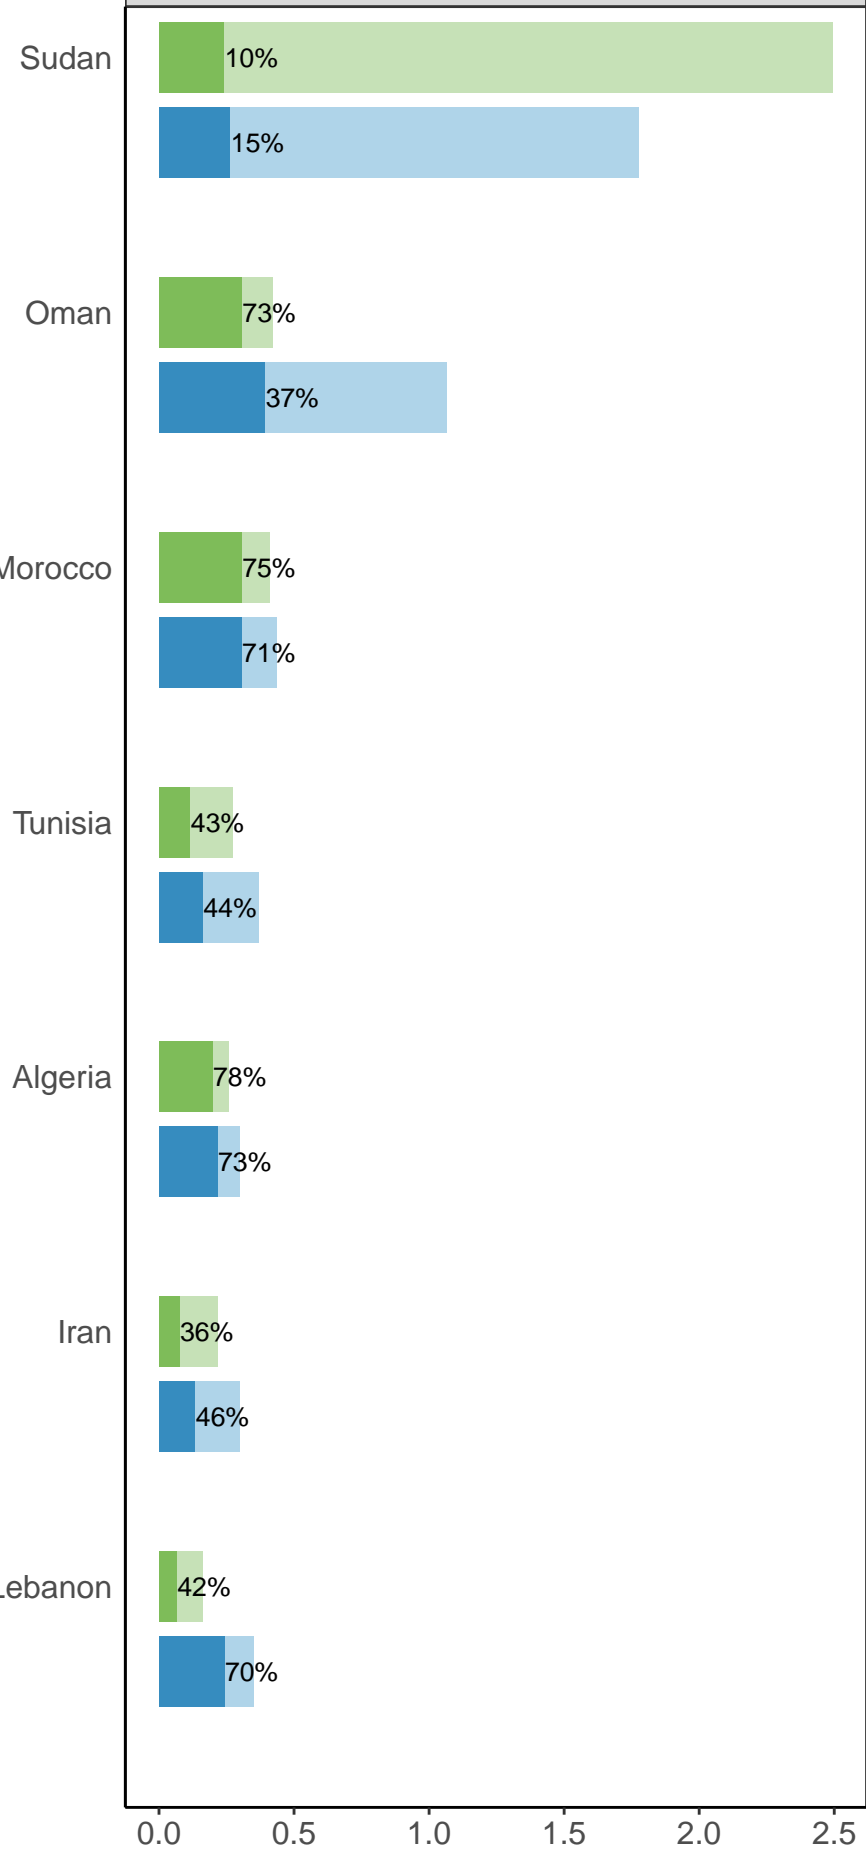

B. Both-sex prevalence 0.1 to 0.3/1000

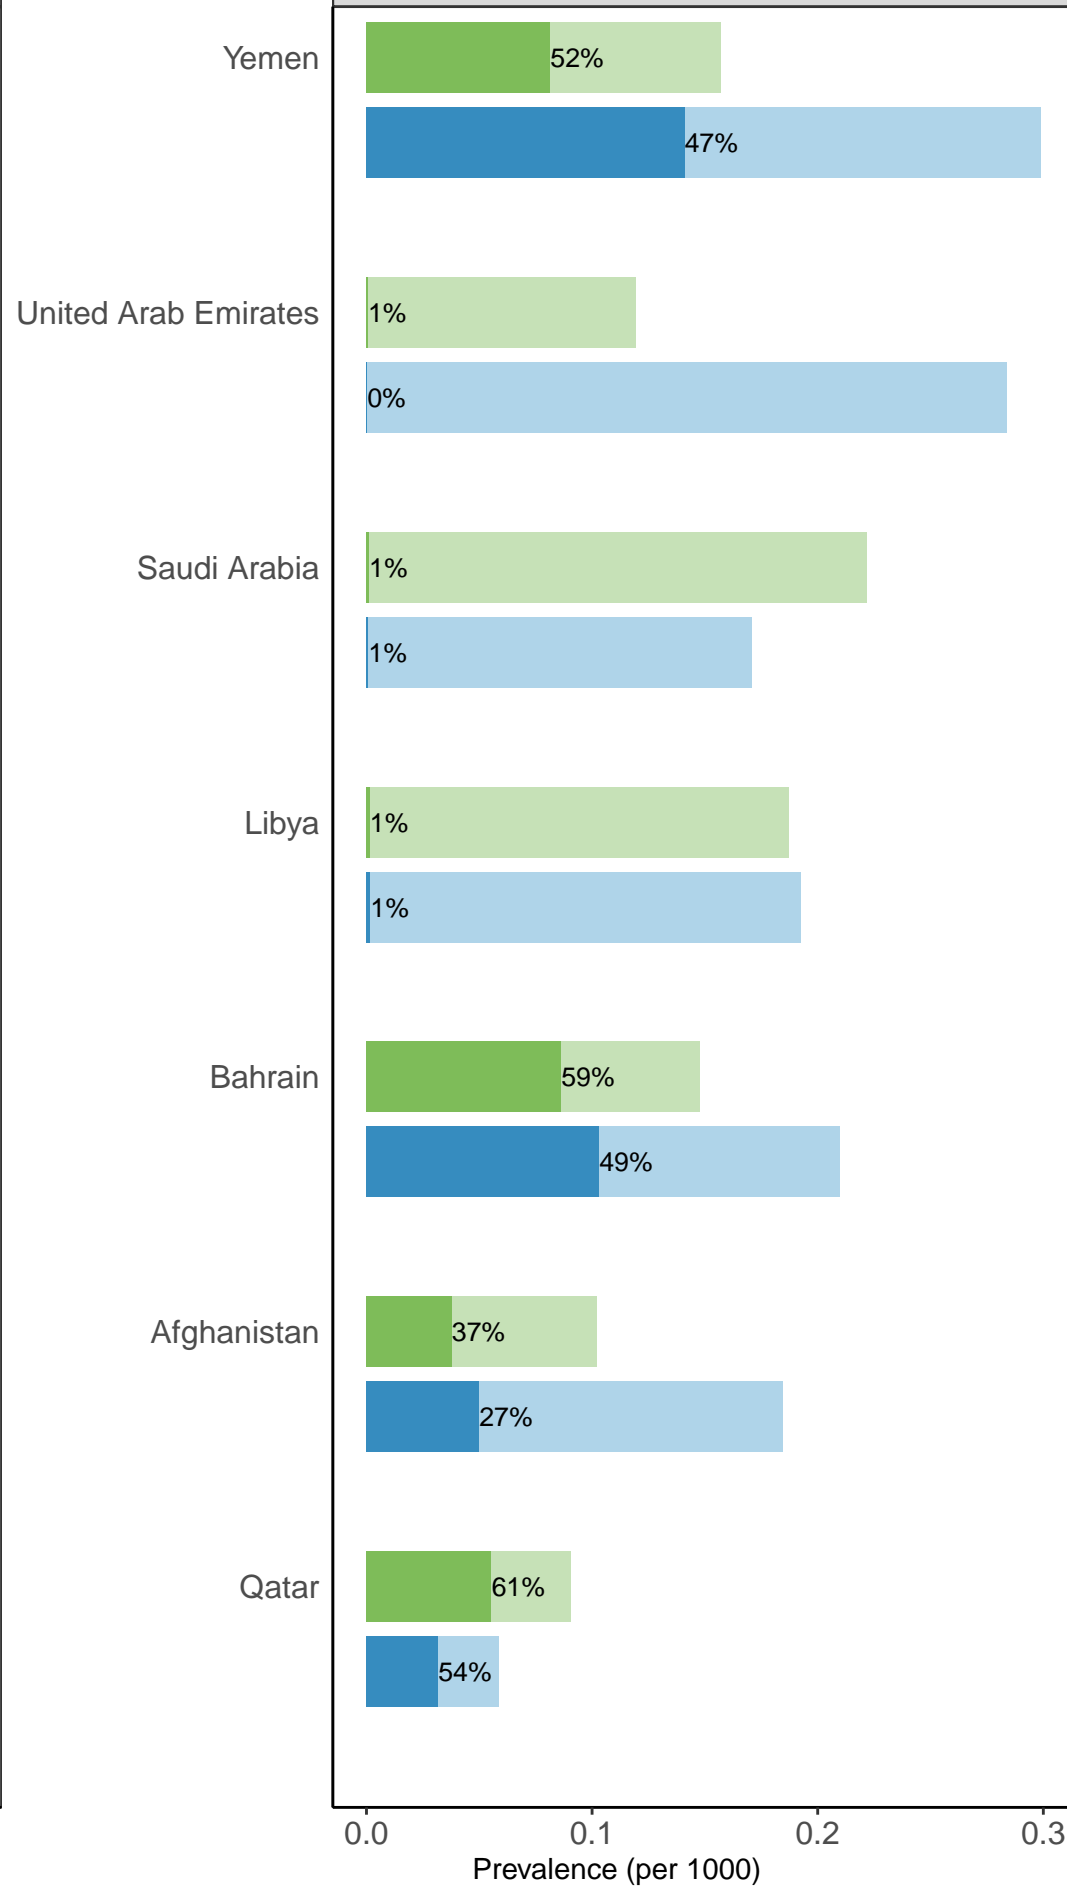

C. Both-sex prevalence 0 to 0.1/1000

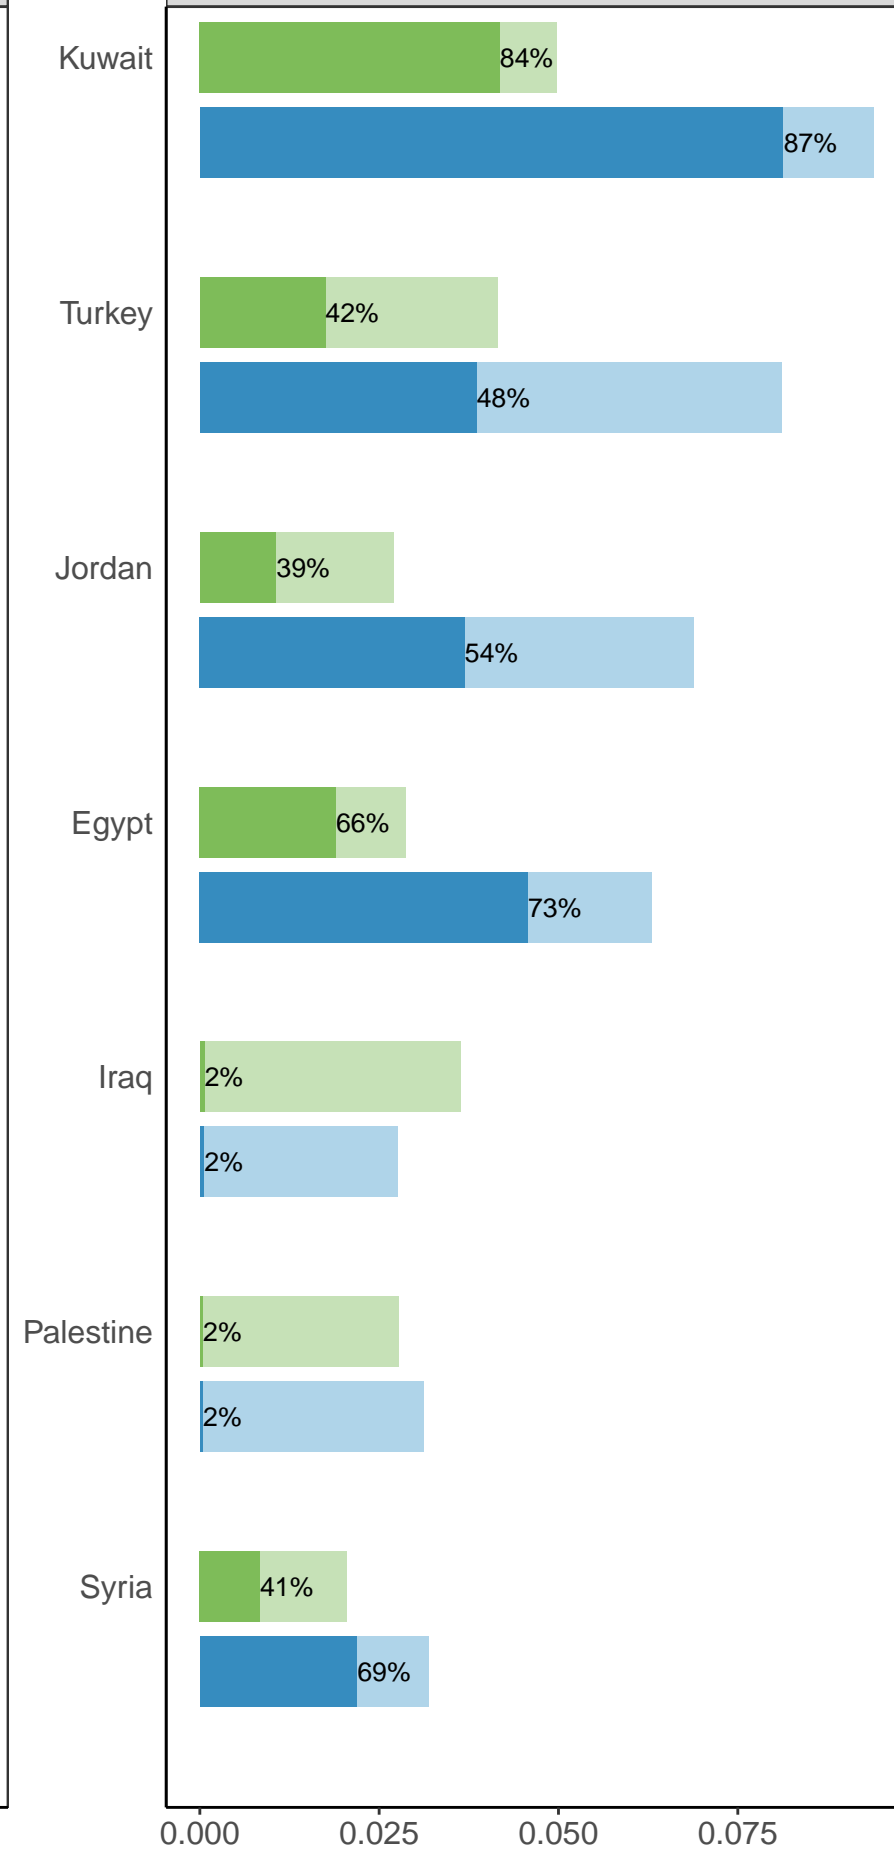

Prevalence (per 1000)

On ART, Females On ART, Males Off ART, Females Off ART, Males

# South Asia

A. Both-sex prevalence 0.6 to 2/1000

B. Both-sex prevalence 0.1 to 0.6/1000

C. Both-sex prevalence 0 to 0.1/1000

India

Pakistan

Bangladesh

Nepal

Bhutan

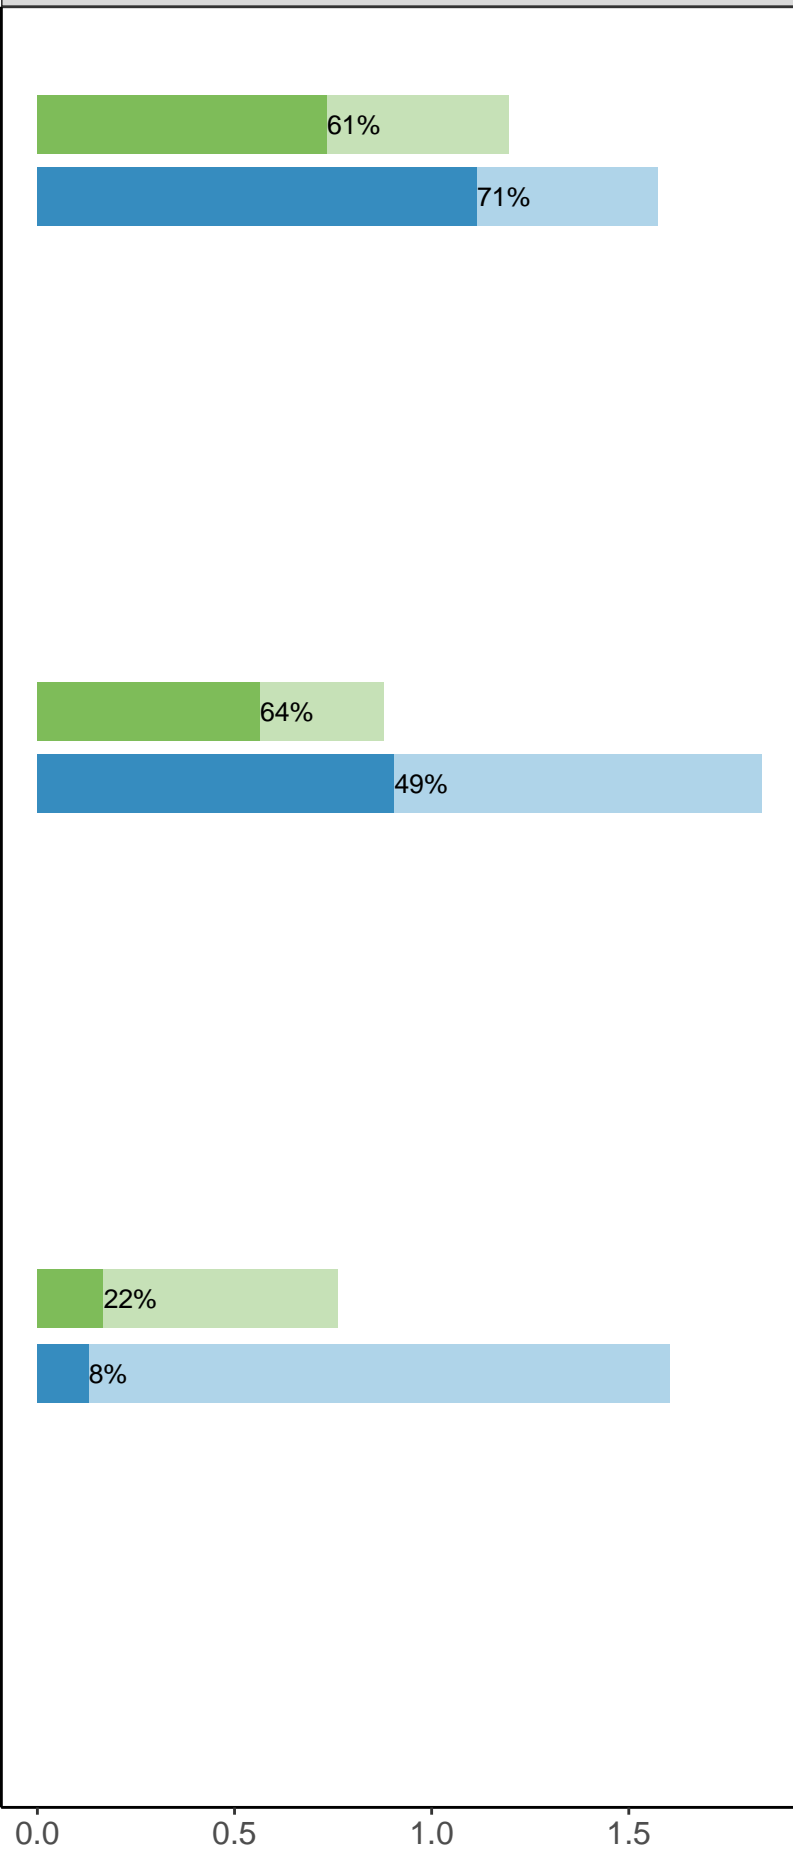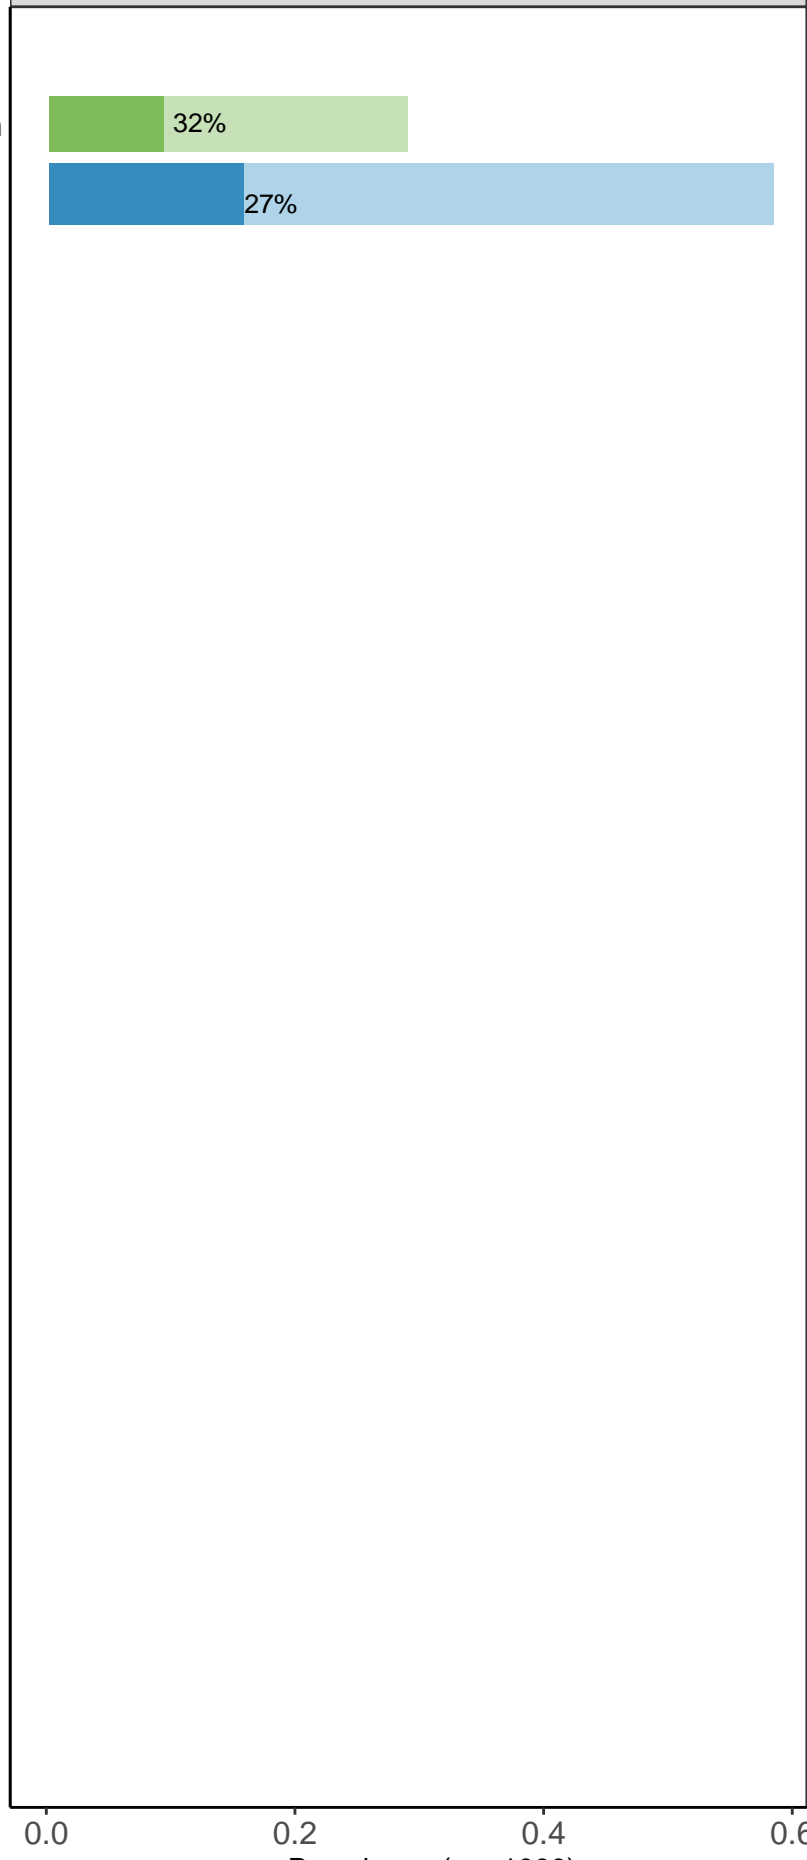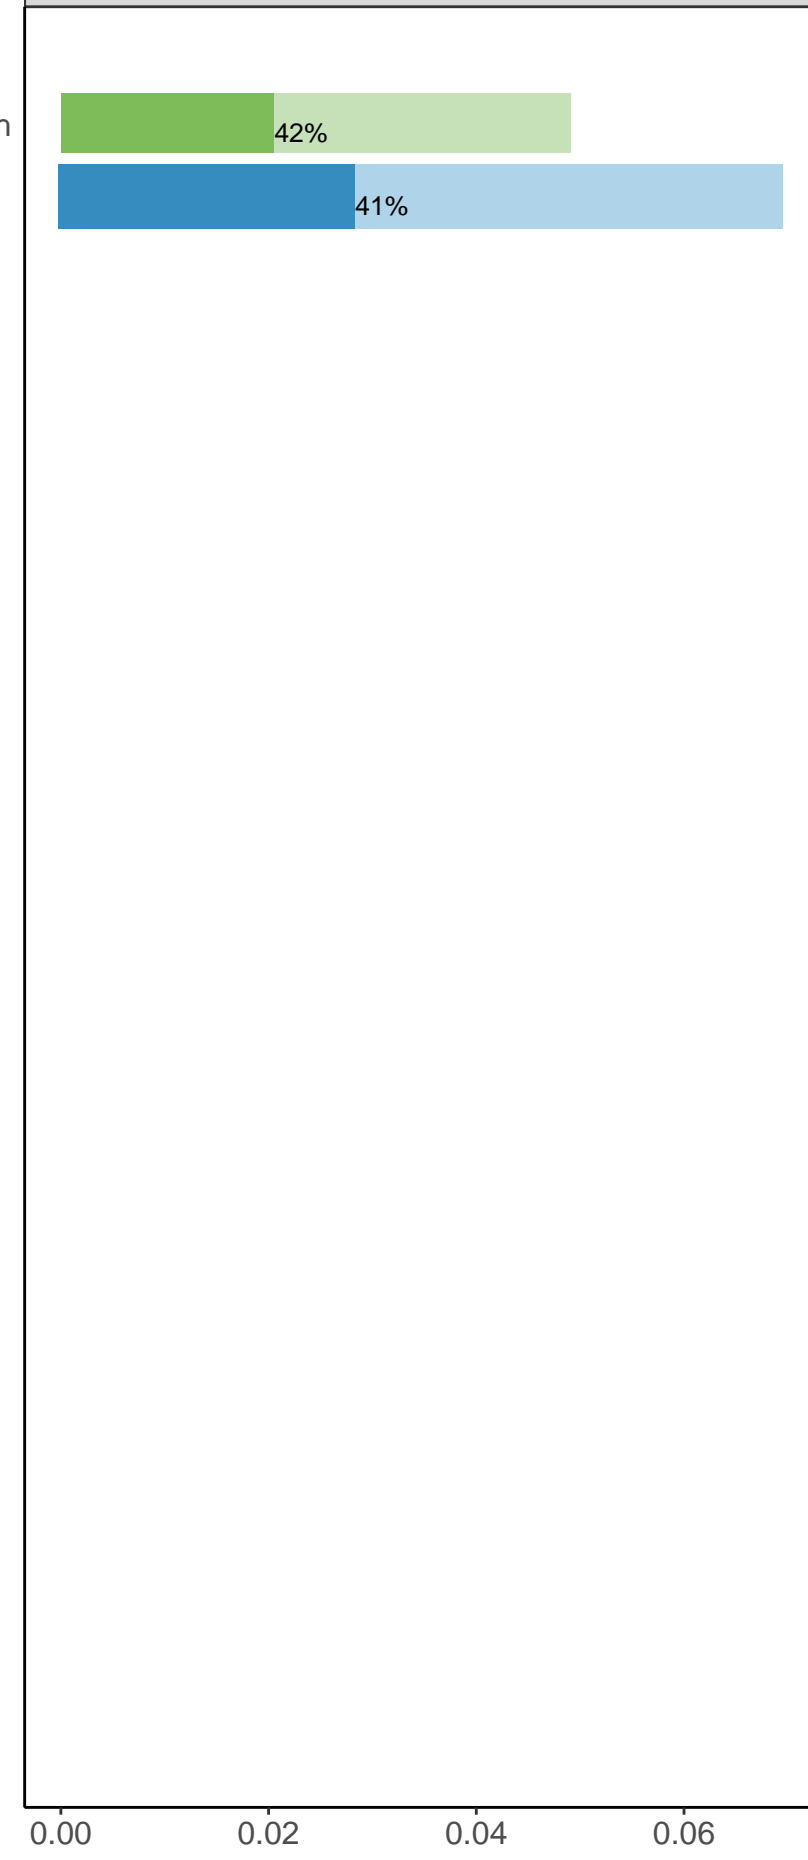

Prevalence (per 1000)

■ On ART, Females 
 ■ On ART, Males 
 ■ Off ART, Females 
 ■ Off ART, Males



Appendix Figure 2. All Age HIV incidence (A), prevalence (B), and mortality (C), in 2017, for both sexes.

A) Incidence

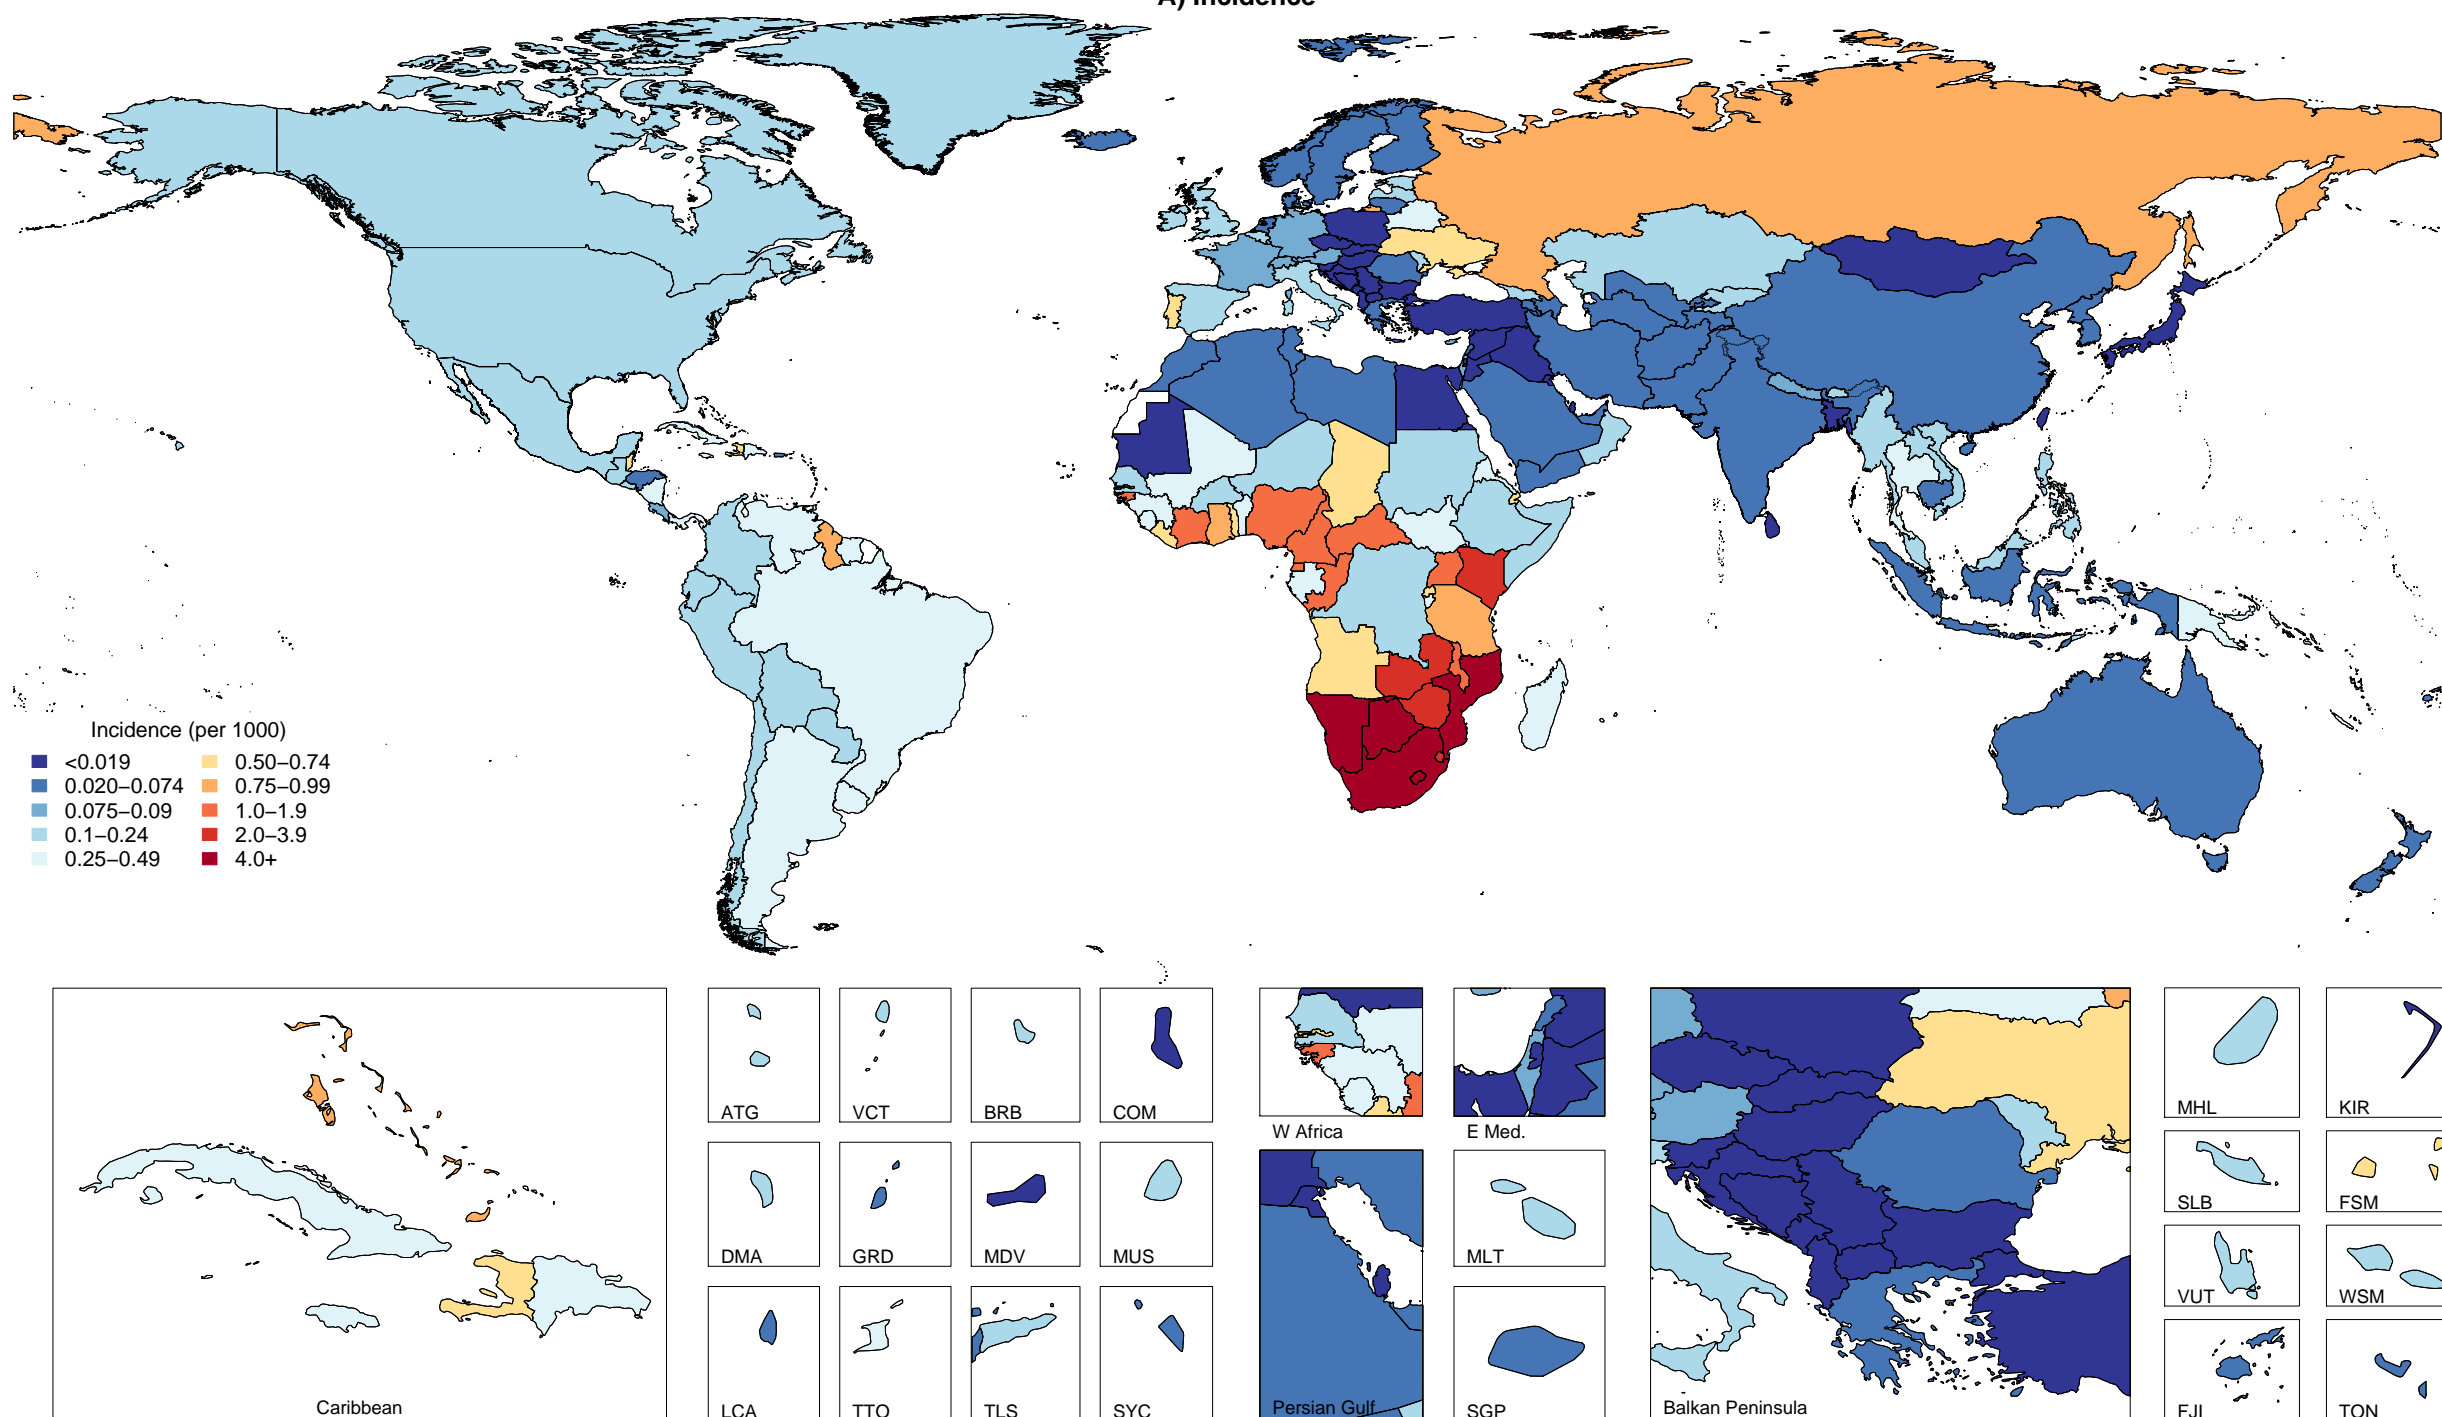

B) Prevalence

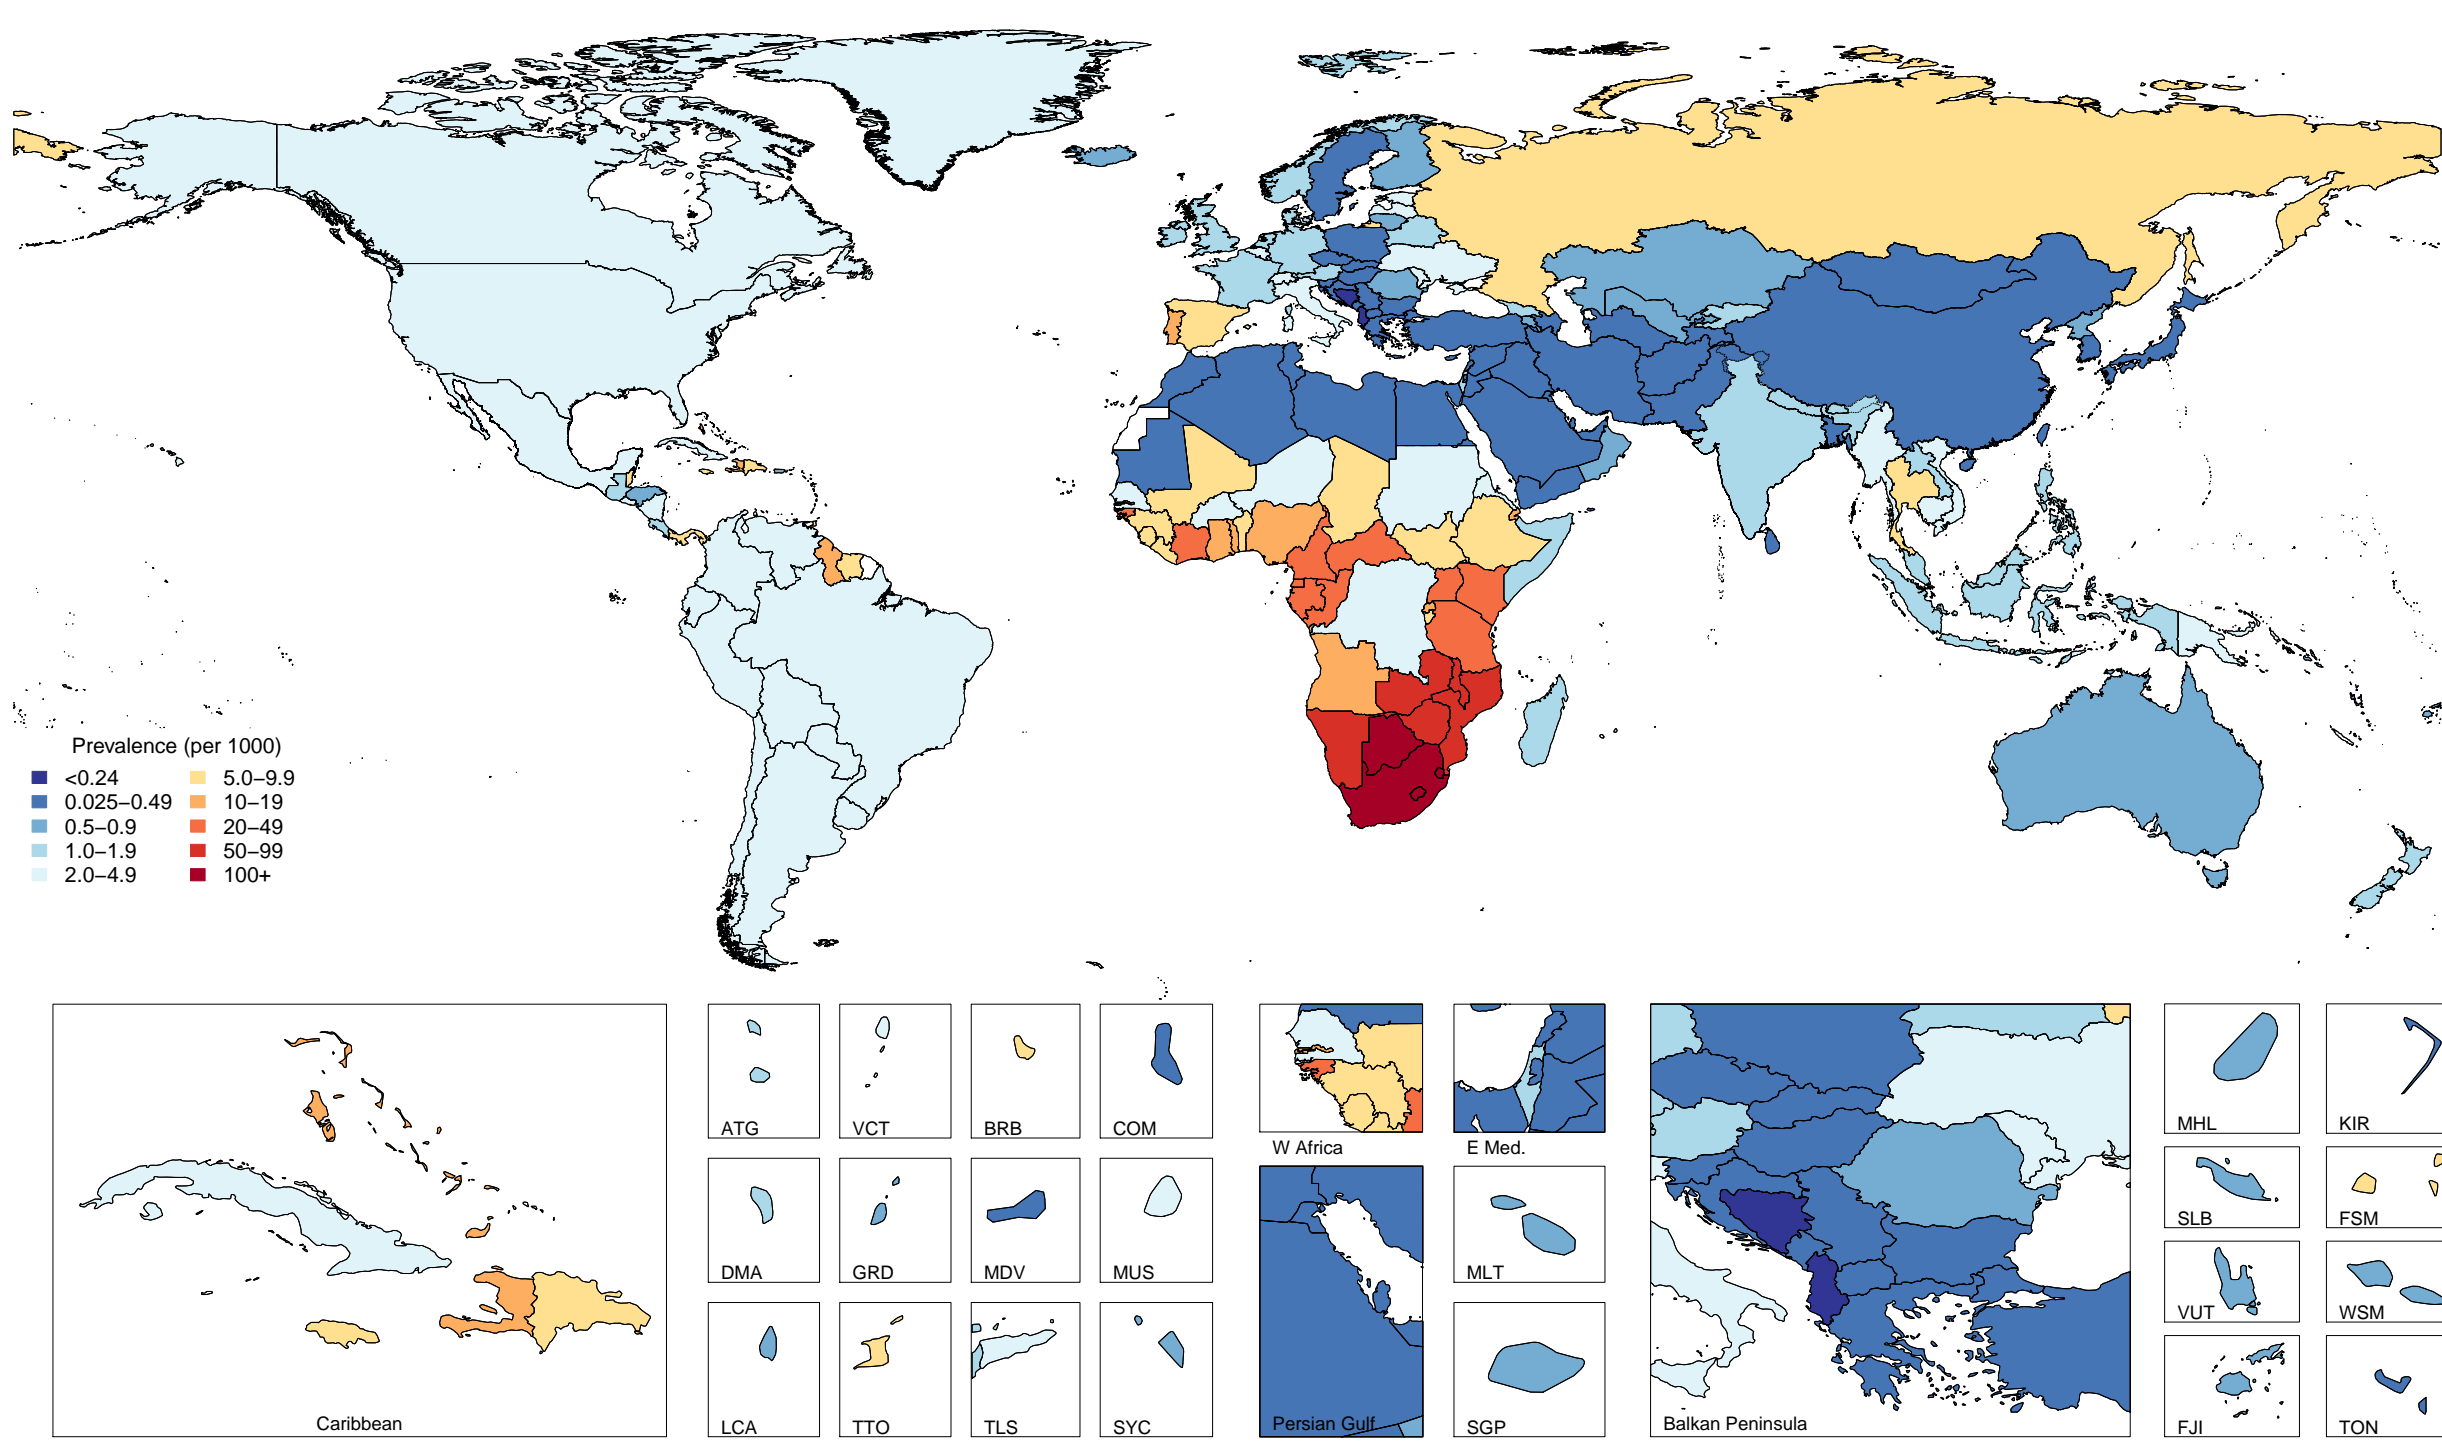

C) Mortality

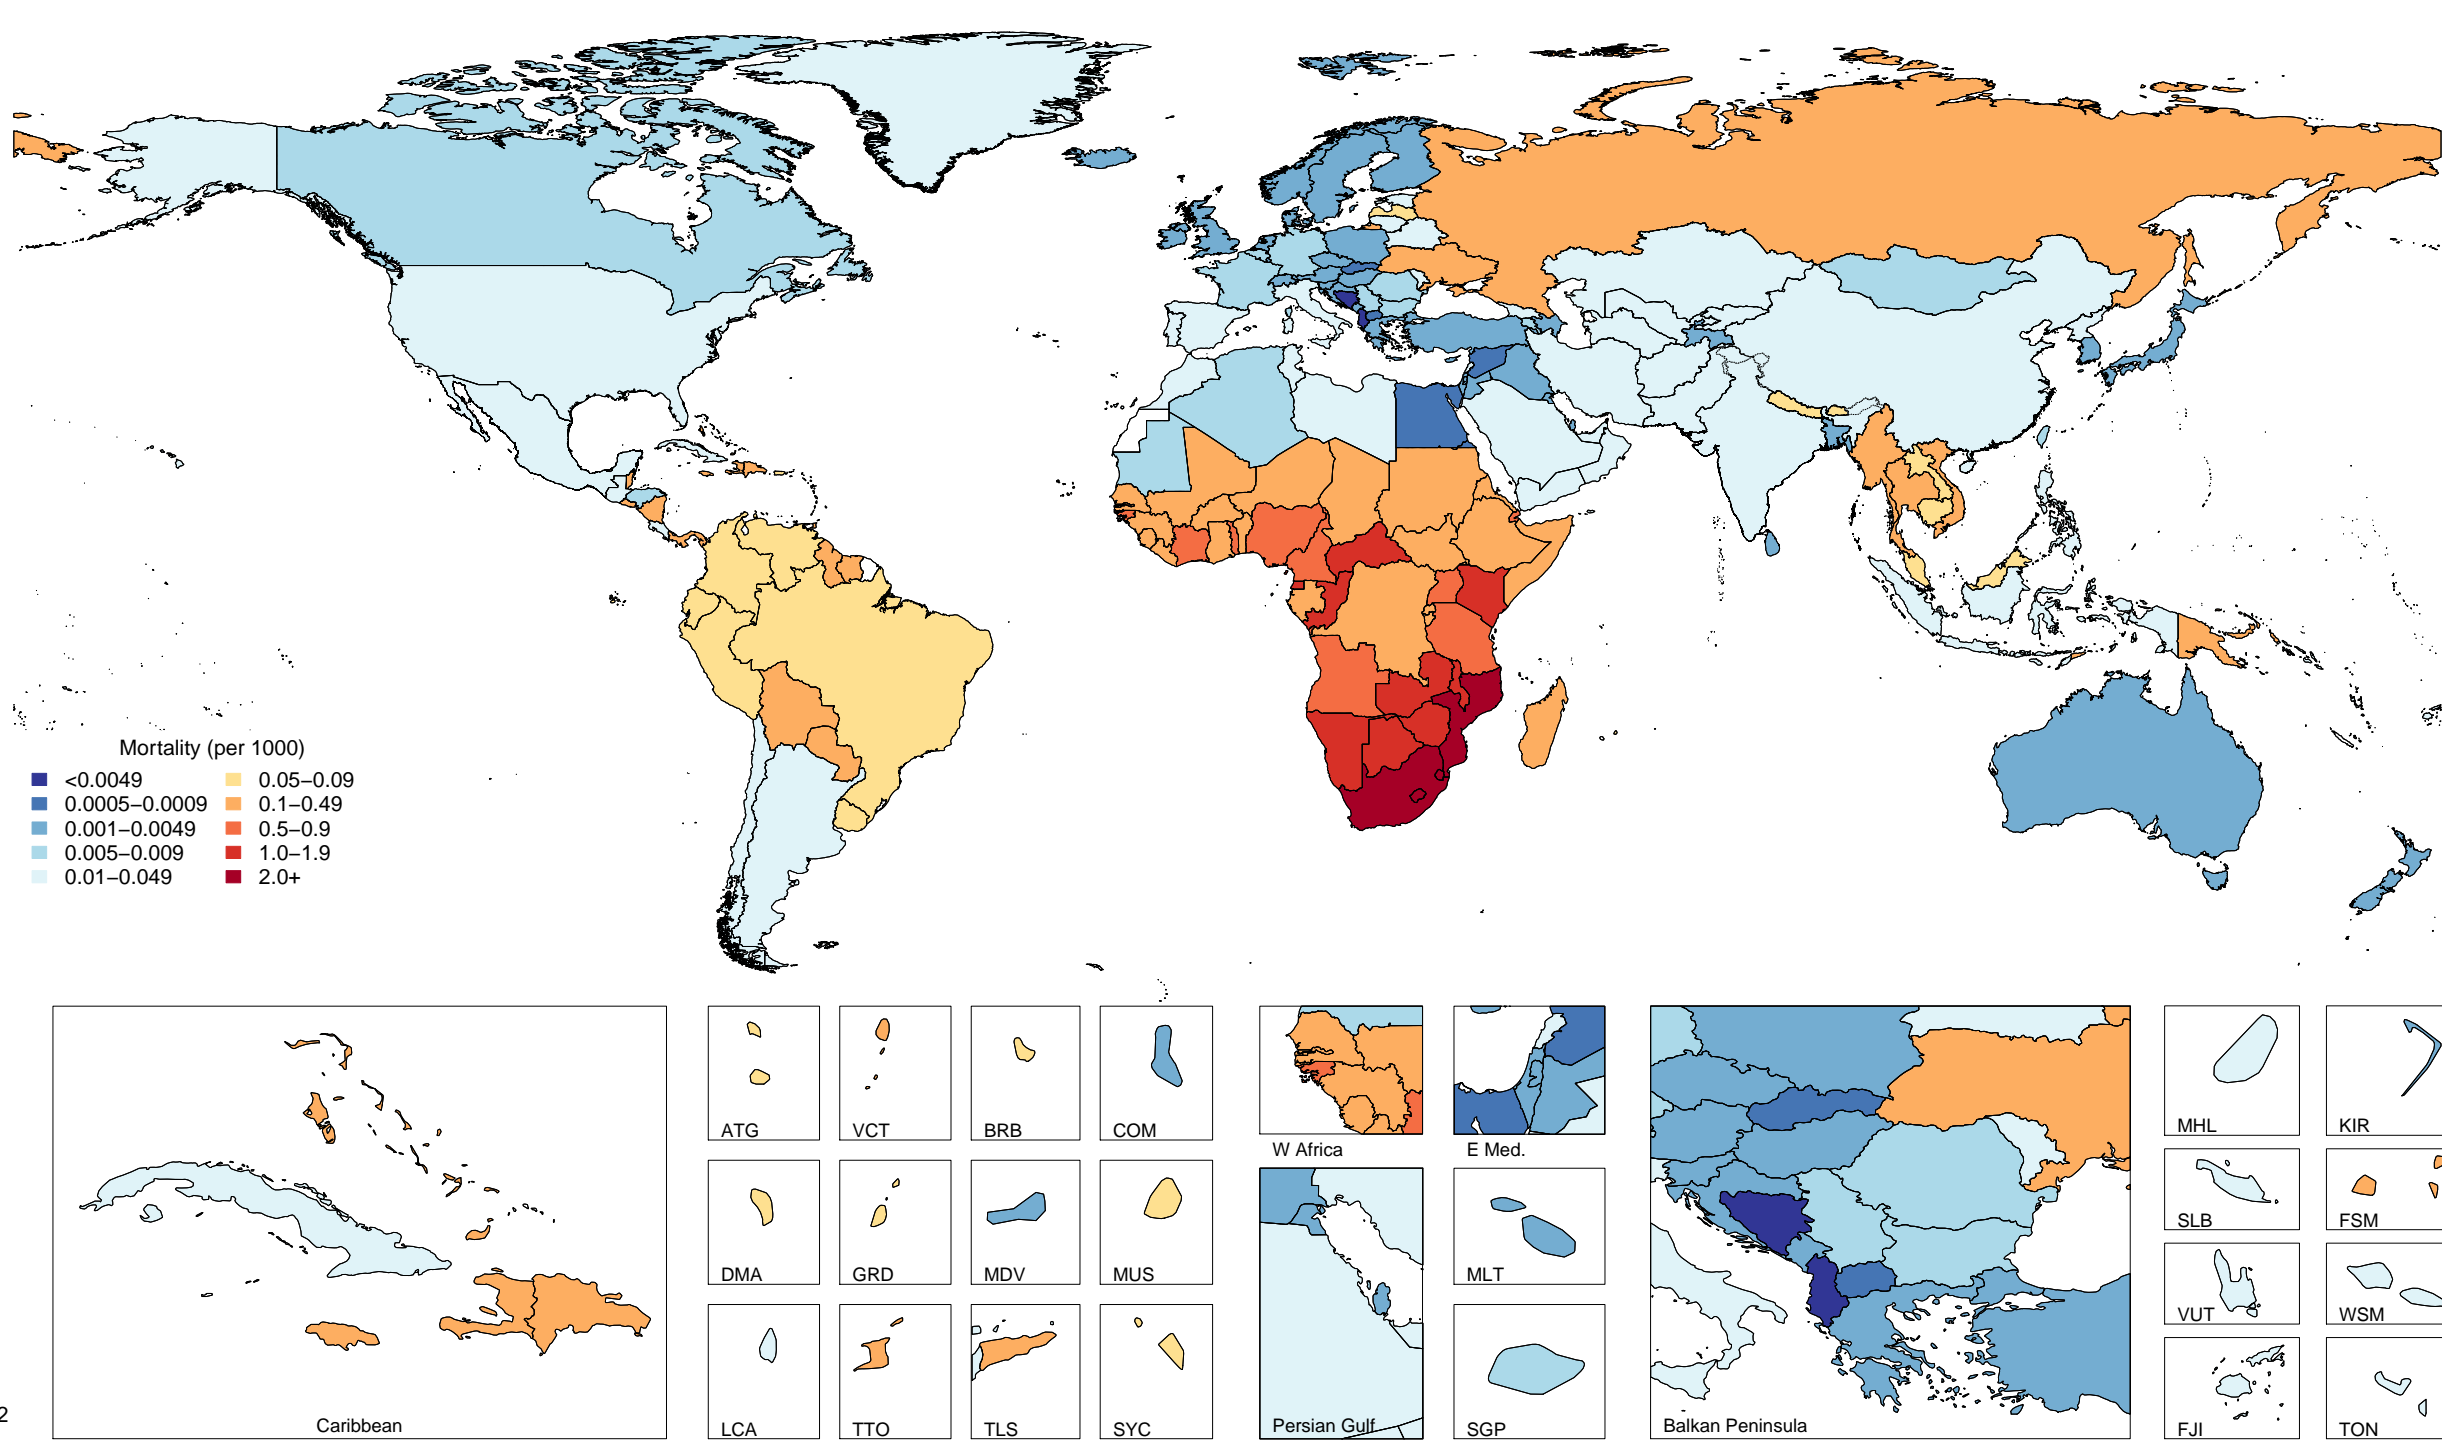

Appendix Figure 3. Percentage of new HIV infections and HIV deaths occurring in each age group in Sub-Saharan Africa, by sex, 2007 and 2017

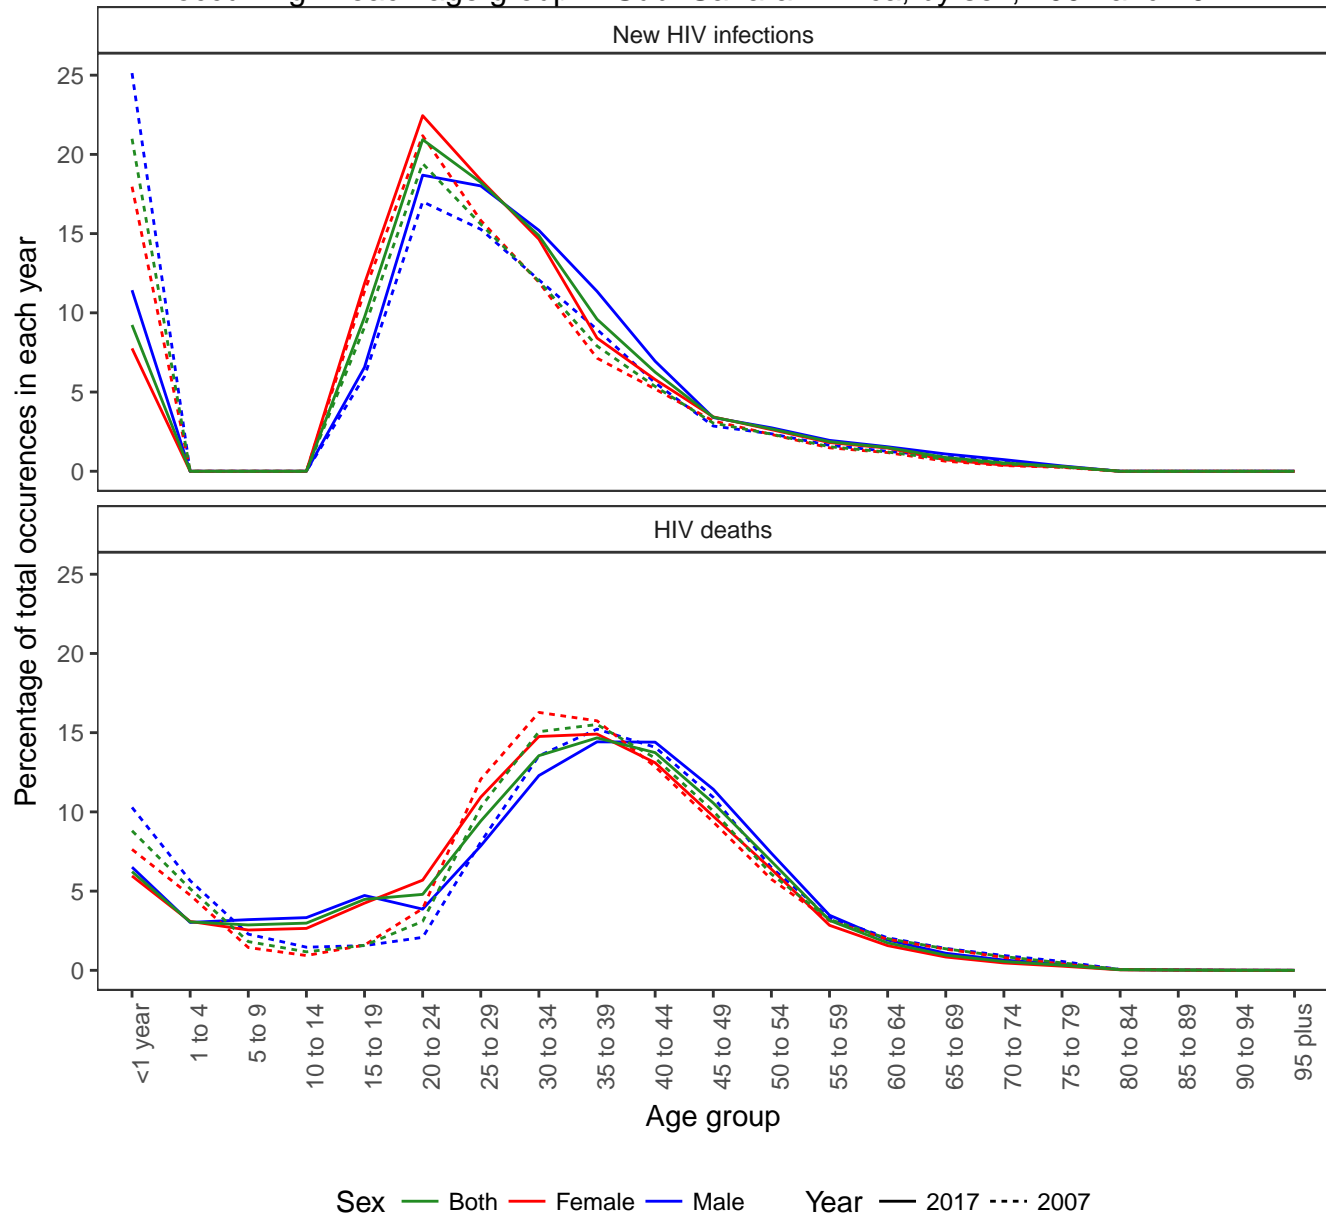

Supplement: mmc2.pdf [file mmc2.pdf]
